# Supplementary material
Source: publisher figshare collection journal article supplement (https://acs.figshare.com/ndownloader/files/3736369)

# A Catalyst-Free Synthesis of Phosphinic Amides using *O*-Benzoylhydroxylamines

Rui Zhu, Chongqing Pan and Zhenhua Gu\*

## Supporting Information

### General Information

The reactions were carried out in Schlenk tubes fitted with glass stoppers under open air atmosphere. Flash column chromatography was performed using 40-63  $\mu\text{m}$  silica gel as the stationary phase.  $^1\text{H}$ ,  $^{13}\text{C}$ ,  $^{19}\text{F}$  and  $^{31}\text{P}$  NMR spectra were recorded on a Bruker AC-400 FT spectrometer using solvent residue as an internal reference (7.26 and 77.00 ppm for  $\text{CDCl}_3$ , respectively). High resolution mass spectral analysis (HRMS) was performed on Water XEVO G2 Q-TOF (Waters Corporation).

### EPR experiments

EPR spectra was recorded at 298 K on EPR spectrometer operated at 9.062 GHz. Typical spectrometer parameters are shown as follows, scan range: 10 mT; center field set: 324 mT; time constant: 0.1s; scan time: 60 s; modulation amplitude: 0.3 mT; modulation frequency: 100 kHz; microwave power: 10 mW.

The interaction between diphenylphosphine oxide, *N*-benzoyloxymorpholine, and  $\text{K}_2\text{CO}_3$  was investigated by electron paramagnetic resonance (EPR) (X band, 9.1GHz, RT): diphenylphosphine oxide (0.20 mmol), *N*-benzoyloxymorpholine (1.2 equiv),  $\text{K}_2\text{CO}_3$  (1.1 equiv) and *t*-AmylOH (2 ml) were added sequentially in a schlenk tube under open air atmosphere. The reaction was stirred at 105  $^\circ\text{C}$  for 20 min, then put the reaction system into liquid nitrogen. Afterwards, 60  $\mu\text{L}$  of the melting mixture was quickly taken out into a small tube and analyzed by EPR.

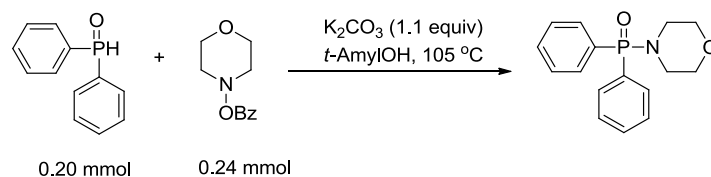

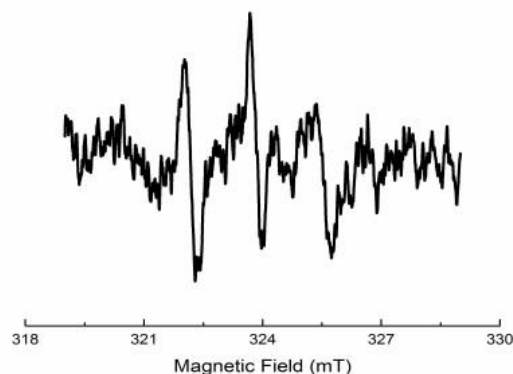

**Figure S1** The EPR spectra

### Typical Procedures for the preparation of **3a**:

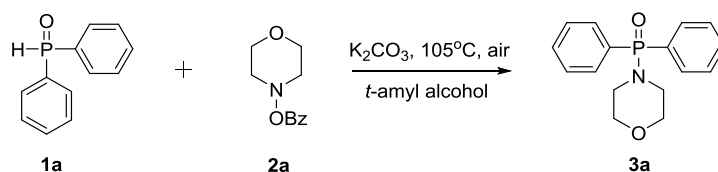

*N*-benzoyloxymorpholine **2a** (50 mg, 0.24 mmol, 1.2 equiv) was added to a solution of **1a** (40 mg, 0.20 mmol, 1.0 equiv) and potassium carbonate (30 mg, 0.22 mmol, 1.1 equiv) in *t*-amyl alcohol (2.0 mL) at room temperature. The mixture was stirred at 105 °C for 8 h under air atmosphere before being diluted with water (15 mL) and extracted with dichloromethane (3×10 mL). The combined organic layer was washed with brine (15 mL), dried over sodium sulfate, filtrated and concentrated. The crude product was purified by column chromatography (ethyl acetate, then hexane/dichloromethane 40/1) to afford **3a** (49 mg, 85%) as white solid. <sup>1</sup>H NMR (400 MHz, CDCl<sub>3</sub>) δ 7.97-7.78 (m, 4 H), 7.58-7.38 (m, 6 H), 3.70 (t, *J* = 4.6 Hz, 4 H), 3.6-2.99 (m, 4 H); <sup>13</sup>C NMR (100 MHz, CDCl<sub>3</sub>) δ 132.4 (d, *J* = 9.1 Hz), 131.9 (d, *J* = 2.6 Hz), 130.8 (d, *J* = 128.3 Hz), 128.7 (d, *J* = 12.3 Hz), 67.2 (d, *J* = 6.7 Hz), 44.9; <sup>31</sup>P NMR (162 MHz, CDCl<sub>3</sub>) δ 29.08; HRMS (ESI) calcd. for C<sub>16</sub>H<sub>19</sub>NO<sub>2</sub>P [M + H]<sup>+</sup>: 288.1153, found 288.1154.

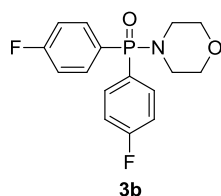

**3b** (52 mg, 81%, reaction time: 6 h) (*R*<sub>f</sub> 0.4, EA) was prepared following the typical procedure in 0.20 mmol scale as colorless oil. <sup>1</sup>H NMR (400 MHz, CDCl<sub>3</sub>) δ 8.01-7.70 (m, 4 H), 7.26-7.03 (m, 4 H), 3.69 (t, *J* = 4.6 Hz, 4 H), 3.15-2.96 (m, 4 H); <sup>13</sup>C NMR (100 MHz, CDCl<sub>3</sub>) δ 165.2 (dd, *J* = 252.5 (C<sub>C,F</sub>), 3.3 Hz), 134.8 (dd, *J* = 10.4, 8.8 Hz), 126.7 (dd, *J* = 132.7, 3.4 (C<sub>C,F</sub>) Hz), 116.2 (dd, *J* = 21.2, 13.6 Hz), 67.2 (d, *J* = 6.6 Hz), 45.0; <sup>19</sup>F NMR (376 MHz, CDCl<sub>3</sub>) δ -106.43; <sup>31</sup>P NMR (162 MHz, CDCl<sub>3</sub>) δ 27.26; HRMS (ESI) calcd. for

$C_{16}H_{17}F_2NO_2P$   $[M + H]^+$ : 324.0965, found 324.0966.

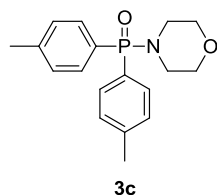

**3c** (49 mg, 78%, reaction time: 10 h) ( $R_f$  0.3, EA) was prepared following the typical procedure in 0.20 mmol scale as yellow oil.  $^1H$  NMR (400 MHz,  $CDCl_3$ )  $\delta$  7.82-7.65 (m, 4 H), 7.32-7.18 (m, 4 H), 3.68 (t,  $J$  = 4.4 Hz, 4 H), 3.19-2.91 (m, 4 H), 2.35 (s, 6 H);  $^{13}C$  NMR (100 MHz,  $CDCl_3$ )  $\delta$  142.3 (d,  $J$  = 2.8 Hz), 132.3 (d,  $J$  = 9.4 Hz), 129.4 (d,  $J$  = 12.8 Hz), 127.7 (d,  $J$  = 130.8 Hz), 67.2 (d,  $J$  = 6.8 Hz), 44.9, 21.5;  $^{31}P$  NMR (162 MHz,  $CDCl_3$ )  $\delta$  29.58; HRMS (ESI) calcd. for  $C_{18}H_{23}NO_2P$   $[M + H]^+$ : 316.1466, found 316.1463.

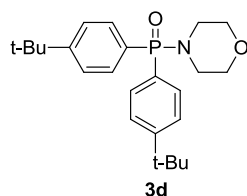

**3d** (61 mg, 88%, reaction time: 8 h) ( $R_f$  0.4, EA) was prepared following the typical procedure in 0.20 mmol scale as yellow solid.  $^1H$  NMR (400 MHz,  $CDCl_3$ )  $\delta$  7.84-7.72 (m, 4 H), 7.50-7.41 (m, 4 H), 3.69 (t,  $J$  = 4.4 Hz, 4 H), 3.19-2.95 (m, 4 H), 1.29 (s, 18 H);  $^{13}C$  NMR (100 MHz,  $CDCl_3$ )  $\delta$  155.2 (d,  $J$  = 2.7 Hz), 132.2 (d,  $J$  = 9.4 Hz), 127.8 (d,  $J$  = 130.6 Hz), 125.60 (d,  $J$  = 12.5 Hz), 67.25 (d,  $J$  = 6.9 Hz), 44.89, 34.90, 31.05;  $^{31}P$  NMR (162 MHz,  $CDCl_3$ )  $\delta$  29.25; HRMS (ESI) calcd. for  $C_{24}H_{35}NO_2P$   $[M + H]^+$ : 400.2405, found 400.2404.

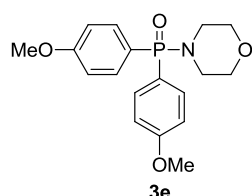

**3e** (61 mg, 88%, reaction time: 10 h) ( $R_f$  0.3, EA) was prepared following the typical procedure in 0.20 mmol scale as yellow oil.  $^1H$  NMR (400 MHz,  $CDCl_3$ )  $\delta$  7.87-7.69 (m, 4 H), 7.00-6.91 (m, 4 H), 3.83 (s, 6 H), 3.69 (t,  $J$  = 4.4 Hz, 4 H), 3.11-2.99 (m, 4 H);  $^{13}C$  NMR (100 MHz,  $CDCl_3$ )  $\delta$  162.5, 134.1 (d,  $J$  = 10.4 Hz), 122.4 (d,  $J$  = 135.2 Hz), 114.2 (d,  $J$  = 13.3 Hz), 67.3 (d,  $J$  = 6.9 Hz), 55.3, 44.9;  $^{31}P$  NMR (162 MHz,  $CDCl_3$ )  $\delta$  29.27; HRMS (ESI) calcd. for  $C_{18}H_{23}NO_4P$   $[M + H]^+$ : 348.1365, found 348.1368.

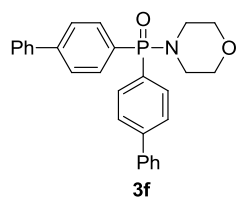

**3f** (74 mg, 84%, reaction time: 12 h) ( $R_f$  0.3, EA) was prepared following the typical procedure in 0.20 mmol scale as yellow oil.  $^1\text{H NMR}$  (400 MHz,  $\text{CDCl}_3$ )  $\delta$  7.98 (dd,  $J$  = 11.2, 8.0 Hz, 4 H), 7.70 (dd,  $J$  = 8.4, 3.2 Hz, 4 H), 7.66-7.55 (m, 4 H), 7.54-7.41 (m, 4 H), 7.41-7.33 (m, 2 H), 3.76 (t,  $J$  = 4.6 Hz, 4 H), 3.25-3.06 (m, 4 H);  $^{13}\text{C NMR}$  (100 MHz,  $\text{CDCl}_3$ )  $\delta$  144.8 (d,  $J$  = 2.8 Hz), 139.8, 132.87 (d,  $J$  = 9.4 Hz), 129.3 (d,  $J$  = 130.4 Hz), 128.9, 128.1, 127.5, 127.4, 67.2 (d,  $J$  = 6.6 Hz), 45.0;  $^{31}\text{P NMR}$  (162 MHz,  $\text{CDCl}_3$ )  $\delta$  29.11; HRMS (ESI) calcd. for  $\text{C}_{28}\text{H}_{27}\text{NO}_2\text{P}$   $[\text{M} + \text{H}]^+$ : 440.1779, found 440.1783.

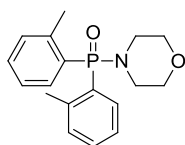

**3g**

**3g** (37 mg, 59%, reaction time: 15 h) ( $R_f$  0.3, EA) was prepared following the typical procedure in 0.20 mmol scale as colorless oil.  $^1\text{H NMR}$  (400 MHz,  $\text{CDCl}_3$ )  $\delta$  7.50-7.36 (m, 4 H), 7.31-7.16 (m, 4 H), 3.71 (t,  $J$  = 4.4 Hz, 4 H), 3.26-3.09 (m, 4 H), 2.53 (s, 6 H);  $^{13}\text{C NMR}$  (100 MHz,  $\text{CDCl}_3$ )  $\delta$  143.0 (d,  $J$  = 9.1 Hz), 132.7 (d,  $J$  = 11.5 Hz), 132.05, 131.90 (t,  $J$  = 3.2 Hz), 130.0 (d,  $J$  = 122.1 Hz), 125.39 (d,  $J$  = 12.9 Hz), 67.36 (d,  $J$  = 5.3 Hz), 44.96, 21.58 (d,  $J$  = 3.7 Hz);  $^{31}\text{P NMR}$  (162 MHz,  $\text{CDCl}_3$ )  $\delta$  34.60; HRMS (ESI) calcd. for  $\text{C}_{18}\text{H}_{23}\text{NO}_2\text{P}$   $[\text{M} + \text{H}]^+$ : 316.1466, found 316.1465.

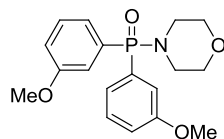

**3h**

**3h** (47 mg, 68%, reaction time: 12 h) ( $R_f$  0.3, EA) was prepared following the typical procedure in 0.20 mmol scale as yellow oil.  $^1\text{H NMR}$  (400 MHz,  $\text{CDCl}_3$ )  $\delta$  7.48-7.32 (m, 6 H), 7.09-6.98 (m, 2 H), 3.83 (s, 6 H), 3.70 (t,  $J$  = 4.4 Hz, 4 H), 3.15-3.01 (m, 4 H);  $^{13}\text{C NMR}$  (100 MHz,  $\text{CDCl}_3$ )  $\delta$  159.7 (d,  $J$  = 15.6 Hz), 132.2 (d,  $J$  = 127.8 Hz), 129.9 (d,  $J$  = 14.6 Hz), 124.3 (d,  $J$  = 8.7 Hz), 118.1 (d,  $J$  = 2.7 Hz), 117.3 (d,  $J$  = 10.3 Hz), 67.2 (d,  $J$  = 6.7 Hz), 55.4, 45.0;  $^{31}\text{P NMR}$  (162 MHz,  $\text{CDCl}_3$ )  $\delta$  29.16; HRMS (ESI) calcd. for  $\text{C}_{18}\text{H}_{23}\text{NO}_4\text{P}$   $[\text{M} + \text{H}]^+$ : 348.1365, found 348.1370.

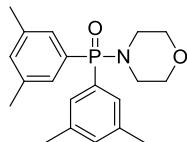

**3i**

**3i** (57 mg, 83%, reaction time: 12 h) ( $R_f$  0.3, EA) was prepared following the typical procedure in 0.20 mmol scale as yellow oil.  $^1\text{H NMR}$  (400 MHz,  $\text{CDCl}_3$ )  $\delta$  7.46 (bd,  $J$  = 11.6 Hz, 4 H), 7.11 (bs, 2 H), 3.70 (t,  $J$  = 4.6 Hz, 4 H), 3.14-2.96 (m, 4 H), 2.33 (s, 12 H);  $^{13}\text{C NMR}$  (100 MHz,  $\text{CDCl}_3$ )  $\delta$  138.3 (d,  $J$  = 12.9 Hz), 133.6 (d,  $J$  = 2.9 Hz), 130.7 (d,  $J$  = 127.0 Hz).

Hz), 129.9 (d,  $J = 9.0$  Hz), 67.25 (d,  $J = 6.5$  Hz), 45.01, 21.27;  $^{31}\text{P}$  NMR (162 MHz,  $\text{CDCl}_3$ )  $\delta$  30.02; HRMS (ESI) calcd. for  $\text{C}_{20}\text{H}_{27}\text{NO}_2\text{P}$   $[\text{M} + \text{H}]^+$ : 344.1779, found 344.1786.

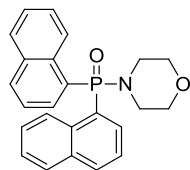

**3j**

**3j** (58 mg, 75%, reaction time: 12 h) ( $R_f$  0.4, EA) was prepared following the typical procedure in 0.20 mmol scale as yellow solid.  $^1\text{H}$  NMR (400 MHz,  $\text{CDCl}_3$ )  $\delta$  9.01-8.79 (m, 2 H), 8.01 (d,  $J = 8.4$  Hz, 2 H), 7.92-7.82 (m, 2 H), 7.71-7.47 (m, 6 H), 7.47-7.34 (m, 2 H), 3.67 (t,  $J = 4.4$  Hz, 4 H), 3.37-3.20 (m, 4 H);  $^{13}\text{C}$  NMR (100 MHz,  $\text{CDCl}_3$ )  $\delta$  133.9 (dd,  $J = 9.7$ , 6.9 Hz), 133.3 (d,  $J = 2.9$  Hz), 133.1 (d,  $J = 11.4$  Hz), 128.7 (d,  $J = 1.0$  Hz), 128.7, 127.7, 127.6 (d,  $J = 4.6$  Hz), 127.5, 127.0 (d,  $J = 85.4$  Hz), 124.4 (d,  $J = 14.9$  Hz), 67.3 (d,  $J = 4.9$  Hz), 45.1;  $^{31}\text{P}$  NMR (162 MHz,  $\text{CDCl}_3$ )  $\delta$  35.65; HRMS (ESI) calcd. for  $\text{C}_{24}\text{H}_{23}\text{NO}_2\text{P}$   $[\text{M} + \text{H}]^+$ : 388.1466, found 388.1469.

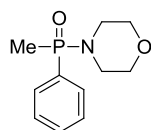

**3k**

**3k** (29 mg, 64%, reaction time: 9 h) ( $R_f$  0.2, EA) was prepared following the typical procedure in 0.20 mmol scale as colorless oil.  $^1\text{H}$  NMR (400 MHz,  $\text{CDCl}_3$ )  $\delta$  7.85-7.71 (m, 2 H), 7.64-7.35 (m, 3 H), 3.75-3.58 (m, 4 H), 3.15-2.93 (m, 4 H), 1.71 (d,  $J = 13.6$  Hz, 3 H);  $^{13}\text{C}$  NMR (100 MHz,  $\text{CDCl}_3$ )  $\delta$  132.1 (d,  $J = 123.5$  Hz), 132.0 (d,  $J = 2.7$  Hz), 131.3 (d,  $J = 9.5$  Hz), 128.7 (d,  $J = 12.3$  Hz), 67.1 (d,  $J = 7.0$  Hz), 44.2, 13.8 (d,  $J = 92.3$  Hz);  $^{31}\text{P}$  NMR (162 MHz,  $\text{CDCl}_3$ )  $\delta$  35.43; HRMS (ESI) calcd. for  $\text{C}_{11}\text{H}_{17}\text{NO}_2\text{P}$   $[\text{M} + \text{H}]^+$ : 226.0997, found 226.1000.

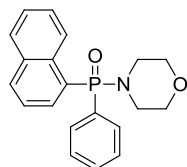

**3l**

**3l** (49 mg, 72%, reaction time: 10 h) ( $R_f$  0.4, EA) was prepared following the typical procedure in 0.20 mmol scale as white solid.  $^1\text{H}$  NMR (300 MHz,  $\text{CDCl}_3$ )  $\delta$  8.88 (d,  $J = 8.4$  Hz, 1 H), 7.98 (d,  $J = 8.1$  Hz, 1 H), 7.93-7.73 (m, 4 H), 7.64-7.34 (m, 6 H), 3.69 (t,  $J = 4.5$  Hz, 4H), 3.26-3.05 (m, 4 H);  $^{13}\text{C}$  NMR (75 MHz,  $\text{CDCl}_3$ )  $\delta$  133.83 (d,  $J = 13.8$  Hz), 133.78 133.6 (t,  $J = 11.3$  Hz), 133.3 (d,  $J = 3.0$  Hz), 132.3, 132.2 (d,  $J = 3.7$  Hz), 131.9 (d,  $J = 3.7$  Hz), 129.3 (d,  $J = 272.0$  Hz), 128.8 (d,  $J = 1.7$  Hz), 128.6 (d,  $J = 16.7$  Hz), 126.9 (d,  $J = 95.1$  Hz),

126.8 (d,  $J = 5.6$  Hz), 126.3, 124.4 (d,  $J = 19.3$  Hz), 67.2 (d,  $J = 5.9$  Hz), 45.0;  $^{31}\text{P}$  NMR (121 MHz,  $\text{CDCl}_3$ )  $\delta$  32.40; HRMS (ESI) calcd. for  $\text{C}_{20}\text{H}_{21}\text{NO}_2\text{P}$   $[\text{M} + \text{H}]^+$ : 338.1310, found 338.1309.

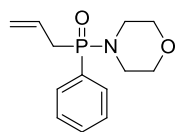

**3m**

**3m** (45 mg, 90%, reaction time: 9 h) ( $R_f$  0.3, EA) was prepared following the typical procedure in 0.20 mmol scale as colorless oil.  $^1\text{H}$  NMR (400 MHz,  $\text{CDCl}_3$ )  $\delta$  7.87-7.67 (m, 2 H), 7.61-7.41 (m, 3 H), 6.95-6.70 (m, 0.1 H), 5.98-5.84 (m, 0.2 H), 5.84-5.67 (m, 0.9 H), 5.24-5.01 (m, 1.8 H), 3.67 (t,  $J = 4.6$  Hz, 4 H), 3.18-2.99 (m, 4 H), 2.95-2.83 (m, 1.7 H), 1.94-1.88 (m, 0.3 H);  $^{13}\text{C}$  NMR (100 MHz,  $\text{CDCl}_3$ )  $\delta$  132.0 (d,  $J = 2.7$  Hz), 131.8 (dd,  $J = 9.2$ , 4.7 Hz), 131.1 (d,  $J = 121.4$  Hz), 128.6 (dd,  $J = 12.2$ , 4.8 Hz), 127.7 (d,  $J = 8.6$  Hz), 120.24 (d,  $J = 12.4$  Hz), 67.07 (d,  $J = 6.6$  Hz), 44.43 (d,  $J = 4.5$  Hz), 33.7 (d,  $J = 87.5$  Hz);  $^{31}\text{P}$  NMR (162 MHz,  $\text{CDCl}_3$ )  $\delta$  34.41; HRMS (ESI) calcd. for  $\text{C}_{13}\text{H}_{19}\text{NO}_2\text{P}$   $[\text{M} + \text{H}]^+$ : 252.1153, found 252.1154.

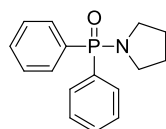

**3n**

**3n** (44 mg, 82%, reaction time: 8 h) ( $R_f$  0.4, EA) was prepared following the typical procedure in 0.20 mmol scale as yellow oil.  $^1\text{H}$  NMR (400 MHz,  $\text{CDCl}_3$ )  $\delta$  8.06-7.87 (m, 2 H), 7.87-7.73 (m, 2 H), 7.58-7.37 (m, 6 H), 3.87 (td,  $J = 8.4$ , 3.6 Hz, 1 H), 3.09-2.96 (m, 1 H), 2.96-2.83 (m, 1 H), 2.17 (bs, 1 H), 2.08-1.87 (m, 2 H), 1.87-1.62 (m, 2 H);  $^{13}\text{C}$  NMR (100 MHz,  $\text{CDCl}_3$ )  $\delta$  133.0, 131.8 (d,  $J = 8.6$  Hz), 131.5 (d,  $J = 112.6$  Hz), 131.7 (dd,  $J = 12.0$ , 2.7 Hz), 131.1 (d,  $J = 8.7$  Hz), 128.5 (dd,  $J = 11.2$ , 4.2 Hz), 56.9 (d,  $J = 84.4$  Hz), 48.3 (d,  $J = 8.6$  Hz), 26.6, 26.4 (d,  $J = 6.5$  Hz);  $^{31}\text{P}$  NMR (162 MHz,  $\text{CDCl}_3$ )  $\delta$  31.43; HRMS (ESI) calcd. for  $\text{C}_{16}\text{H}_{19}\text{NOP}$   $[\text{M} + \text{H}]^+$ : 272.1204, found 272.1208.

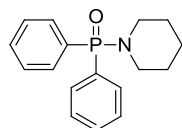

**3o**

**3o** (52 mg, 91%, reaction time: 8 h) ( $R_f$  0.4, EA) was prepared following the typical procedure in 0.20 mmol scale as white solid.  $^1\text{H}$  NMR (400 MHz,  $\text{CDCl}_3$ )  $\delta$  7.94-7.79 (m, 4 H), 7.54-7.35 (m, 6 H), 3.00 (dd,  $J = 10.8$ , 6.4 Hz, 4 H), 1.72-1.45 (m, 6 H);  $^{13}\text{C}$  NMR (100 MHz,  $\text{CDCl}_3$ )  $\delta$  132.2 (d,  $J = 10.0$  Hz), 132.0 (d,  $J = 128.5$  Hz), 131.5 (d,  $J = 2.7$  Hz), 128.5 (d,  $J = 12.3$  Hz), 45.7, 26.2 (d,  $J = 6.8$  Hz), 24.5;  $^{31}\text{P}$  NMR (162 MHz,  $\text{CDCl}_3$ )  $\delta$  28.98;

HRMS (ESI) calcd. for  $C_{17}H_{21}NOP$   $[M + H]^+$ : 286.1361, found 286.1357.

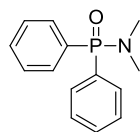

**3p**

**3p** (45 mg, 91%, reaction time: 9 h) ( $R_f$  0.3, EA) was prepared following the typical procedure in 0.20 mmol scale as colorless oil.  $^1H$  NMR (400 MHz,  $CDCl_3$ )  $\delta$  7.93-7.76 (m, 4 H), 7.55-7.36 (m, 6 H), 2.66 (s, 3 H), 2.63 (s, 3 H);  $^{13}C$  NMR (100 MHz,  $CDCl_3$ )  $\delta$  132.3 (d,  $J = 9.2$  Hz), 131.8 (d,  $J = 128.4$  Hz), 131.7 (d,  $J = 2.7$  Hz), 128.5 (d,  $J = 12.3$  Hz), 37.1 (d,  $J = 2.4$  Hz);  $^{31}P$  NMR (162 MHz,  $CDCl_3$ )  $\delta$  31.27; HRMS (ESI) calcd. for  $C_{14}H_{17}NOP$   $[M + H]^+$ : 246.1048, found 246.1044.

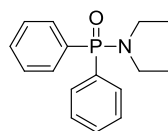

**3q**

**3q** (37 mg, 67%, reaction time: 10 h) ( $R_f$  0.3, EA) was prepared following the typical procedure in 0.20 mmol scale as yellow oil.  $^1H$  NMR (400 MHz,  $CDCl_3$ )  $\delta$  8.00-7.80 (m, 4 H), 7.60-7.37 (m, 6 H), 3.61-3.47 (m, 1 H), 2.89-2.72 (m, 1 H), 2.58-2.40 (m, 1 H), 1.85 (bs, 1 H), 1.31 (dd,  $J = 15.6, 6.8$  Hz, 3 H), 1.01 (t,  $J = 7.2$  Hz, 3 H);  $^{13}C$  NMR (100 MHz,  $CDCl_3$ )  $\delta$  131.8 (d,  $J = 183.7$  Hz), 131.68 (dd,  $J = 40.6, 8.4$  Hz), 131.67 (t,  $J = 2.5$  Hz), 128.4 (dd,  $J = 15.6, 11.1$  Hz), 52.6 (d,  $J = 83.6$  Hz), 42.3 (d,  $J = 11.7$  Hz), 15.3, 14.2 (d,  $J = 1.8$  Hz);  $^{31}P$  NMR (162 MHz,  $CDCl_3$ )  $\delta$  32.11; HRMS (ESI) calcd. for  $C_{16}H_{21}NOP$   $[M + H]^+$ : 274.1361, found 274.1361.

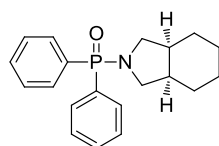

**3s**

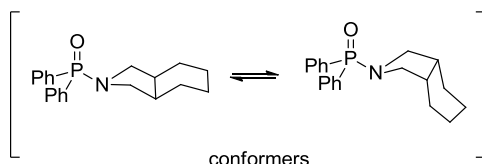

**3s** (56 mg, 86%, reaction time: 12 h) ( $R_f$  0.3, EA) was prepared following the typical procedure in 0.20 mmol scale as white solid. **Conformers were observed by NMR analysis.**  $^1H$  NMR (400 MHz,  $CDCl_3$ )  $\delta$  8.11-7.92 (m, 2 H), 7.92-7.75 (m, 2 H), 7.62-7.34 (m, 6 H), 4.20 (t,  $J = 8.8$  Hz, 0.1 H), 3.80 (dd,  $J = 6.8, 4.4$  Hz, 0.9 H), 3.22-3.12 (m, 0.1 H), 2.89-2.68 (m, 1.9 H), 2.56-2.34 (m, 1 H), 2.15 (s, 1 H), 2.08-1.92 (m, 1 H), 1.69-1.11 (m, 8 H);  $^{13}C$  NMR (100 MHz,  $CDCl_3$ )  $\delta$  133.1 (d,  $J = 92.8$  Hz), 131.9, 131.7 (dd,  $J = 99.4, 8.4$  Hz), 131.6 (dd,  $J = 12.4, 2.6$  Hz), 130.9, 128.4 (dd,  $J = 11.0, 8.8$  Hz), 59.9, 59.0, 51.5 (d,  $J = 4.7$  Hz), 39.0 (d,  $J = 3.3$  Hz), 27.3 (d,  $J = 5.3$  Hz), 26.0, 23.4, 22.6;  $^{31}P$  NMR (162 MHz,  $CDCl_3$ )  $\delta$  30.63; HRMS (ESI) calcd. for  $C_{20}H_{25}NOP$   $[M + H]^+$ : 326.1674, found 326.1677.

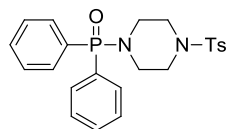

**3t**

**3t** (42 mg, 48%, reaction time: 12 h) ( $R_f$  0.3, EA) was prepared following the typical procedure in 0.20 mmol scale as yellow solid.  $^1\text{H NMR}$  (400 MHz,  $\text{CDCl}_3$ )  $\delta$  7.93-7.70 (m, 4H), 7.65-7.4 (m, 7H), 7.28 (d,  $J$  = 8.0 Hz, 3H), 3.81-3.68 (m, 1 H), 3.64 (d,  $J$  = 12.0 Hz, 2 H), 3.51 (bs, 1 H), 3.09 (d,  $J$  = 13.2 Hz, 1 H), 2.99-2.85 (m, 1 H), 2.52-2.35 (m, 4 H), 2.32-2.18 (m, 1 H);  $^{13}\text{C NMR}$  (100 MHz,  $\text{CDCl}_3$ )  $\delta$  143.9, 132.5 (dd,  $J$  = 21.8, 2.7 Hz), 132.3, 131.4 (d,  $J$  = 11.1 Hz), 131.2 (d,  $J$  = 9.1 Hz), 129.0 (d,  $J$  = 10.6 Hz), 128.8 (d,  $J$  = 11.7 Hz), 128.7 (d,  $J$  = 209.5 Hz), 53.8 (d,  $J$  = 80.4 Hz), 46.4, 45.6 (dd,  $J$  = 34.5, 6.3 Hz), 29.7, 21.5;  $^{31}\text{P NMR}$  (162 MHz,  $\text{CDCl}_3$ )  $\delta$  28.88; HRMS (ESI) calcd. for  $\text{C}_{23}\text{H}_{26}\text{N}_2\text{O}_3\text{PS}$  [ $\text{M} + \text{H}$ ] $^+$ : 441.1402, found 441.1401.

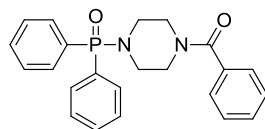

**3u**

**3u** (64 mg, 82%, reaction time: 8 h) ( $R_f$  0.3, EA) was prepared following the typical procedure in 0.20 mmol scale as yellow oil.  $^1\text{H NMR}$  (400 MHz,  $\text{CDCl}_3$ )  $\delta$  7.93-7.76 (m, 4 H), 7.60-7.41 (m, 6 H), 7.41-7.28 (m, 5 H), 3.61 (bd,  $J$  = 12.8 Hz, 4 H), 3.08 (bs, 4 H);  $^{13}\text{C NMR}$  (100 MHz,  $\text{CDCl}_3$ )  $\delta$  170.5, 135.4, 132.2 (d,  $J$  = 9.2 Hz), 132.1 (d,  $J$  = 2.7 Hz), 130.7 (d,  $J$  = 128.1 Hz), 129.8, 128.7 (d,  $J$  = 12.4 Hz), 128.5, 126.9, 45.0 (m);  $^{31}\text{P NMR}$  (162 MHz,  $\text{CDCl}_3$ )  $\delta$  29.66; HRMS (ESI) calcd. for  $\text{C}_{23}\text{H}_{24}\text{N}_2\text{O}_2\text{P}$  [ $\text{M} + \text{H}$ ] $^+$ : 391.1575, found 391.1576.

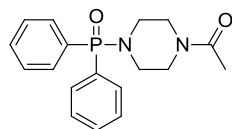

**3v**

**3v** (49 mg, 74%, reaction time: 10 h) ( $R_f$  0.3, EA) was prepared following the typical procedure in 0.20 mmol scale as yellow oil.  $^1\text{H NMR}$  (400 MHz,  $\text{CDCl}_3$ )  $\delta$  7.92-7.77 (m, 4 H), 7.58-7.40 (m, 6 H), 3.68-3.56 (m, 2 H), 3.53-3.39 (m, 2 H), 3.16-3.06 (m, 2 H), 3.06-2.97 (m, 2 H), 2.06 (s, 3 H);  $^{13}\text{C NMR}$  (75 MHz,  $\text{CDCl}_3$ )  $\delta$  169.1, 132.2 (d,  $J$  = 9.2 Hz), 132.1 (d,  $J$  = 2.7 Hz), 130.8 (d,  $J$  = 170.8 Hz), 128.8 (d,  $J$  = 12.5 Hz), 46.9 (d,  $J$  = 6.3 Hz), 44.9 (d,  $J$  = 5.9 Hz), 41.9 (d,  $J$  = 6.1 Hz), 21.3;  $^{31}\text{P NMR}$  (162 MHz,  $\text{CDCl}_3$ )  $\delta$  29.70; HRMS (ESI) calcd. for  $\text{C}_{18}\text{H}_{22}\text{N}_2\text{O}_2\text{P}$  [ $\text{M} + \text{H}$ ] $^+$ : 329.1419, found 329.1414.

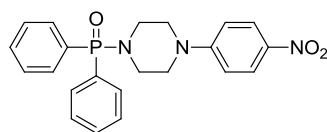

**3w**



**3w** (52 mg, 64%, reaction time: 10 h) ( $R_f$  0.2, EA) was prepared following the typical procedure in 0.20 mmol scale as yellow solid.  $^1\text{H NMR}$  (400 MHz,  $\text{CDCl}_3$ )  $\delta$  8.18-8.07 (m, 2 H), 7.97-7.84 (m, 4 H), 7.62-7.44 (m, 6 H), 6.87-6.75 (m, 2 H), 3.47-3.38 (m, 4 H), 3.31-3.20 (m, 4 H);  $^{13}\text{C NMR}$  (100 MHz,  $\text{CDCl}_3$ )  $\delta$  154.9, 139.0, 132.3 (d,  $J = 9.2$  Hz), 132.2 (d,  $J = 2.7$  Hz), 130.8 (d,  $J = 128.3$  Hz), 128.8 (d,  $J = 12.5$  Hz), 125.9, 113.10, 47.8 (d,  $J = 6.5$  Hz), 44.5;  $^{31}\text{P NMR}$  (162 MHz,  $\text{CDCl}_3$ )  $\delta$  29.53; HRMS (ESI) calcd. for  $\text{C}_{22}\text{H}_{23}\text{N}_3\text{O}_3\text{P}$   $[\text{M} + \text{H}]^+$ : 408.1477, found 408.1477.

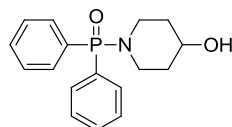

**3x**

**3x** (40 mg, 67%, reaction time: 8 h) ( $R_f$  0.1, EA) was prepared following the typical procedure in 0.20 mmol scale as yellow oil.  $^1\text{H NMR}$  (400 MHz,  $\text{CDCl}_3$ )  $\delta$  7.98-7.75 (m, 4 H), 7.58-7.35 (m, 6 H), 3.93-3.72 (m, 1 H), 3.42-3.18 (m, 2 H), 2.96-2.74 (m, 2 H), 2.54 (bs, 1 H), 1.97-1.79 (m, 2 H), 1.66-1.46 (m, 2 H);  $^{13}\text{C NMR}$  (100 MHz,  $\text{CDCl}_3$ )  $\delta$  132.2 (d,  $J = 9.2$  Hz), 131.8 (d,  $J = 2.7$  Hz), 131.6 (d,  $J = 128.5$  Hz), 128.6 (d,  $J = 12.4$  Hz), 67.7, 42.8, 34.9 (d,  $J = 6.5$  Hz);  $^{31}\text{P NMR}$  (162 MHz,  $\text{CDCl}_3$ )  $\delta$  29.52; HRMS (ESI) calcd. for  $\text{C}_{17}\text{H}_{21}\text{NO}_2\text{P}$   $[\text{M} + \text{H}]^+$ : 302.1310, found 302.1310.

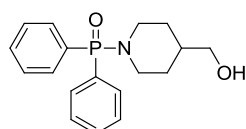

**3y**

**3y** (56 mg, 89%, reaction time: 10 h) ( $R_f$  0.2, EA) was prepared following the typical procedure in 0.20 mmol scale as yellow oil.  $^1\text{H NMR}$  (400 MHz,  $\text{CDCl}_3$ )  $\delta$  7.98-7.67 (m, 4 H), 7.57-7.34 (m, 6 H), 3.50 (d,  $J = 5.6$  Hz, 2 H), 3.37-3.20 (m, 2 H), 2.91 (bs, 1 H), 2.84-2.68 (m, 2 H), 1.76-1.57 (m, 2 H), 1.37-1.15 (m, 2 H);  $^{13}\text{C NMR}$  (100 MHz,  $\text{CDCl}_3$ )  $\delta$  132.2 (d,  $J = 9.2$  Hz), 131.7 (d,  $J = 2.7$  Hz), 130.9, 128.5 (d,  $J = 12.3$  Hz), 67.3, 44.9, 38.7, 29.2 (d,  $J = 6.7$  Hz);  $^{31}\text{P NMR}$  (162 MHz,  $\text{CDCl}_3$ )  $\delta$  29.50; HRMS (ESI) calcd. for  $\text{C}_{18}\text{H}_{23}\text{NO}_2\text{P}$   $[\text{M} + \text{H}]^+$ : 316.1466, found 316.1468.

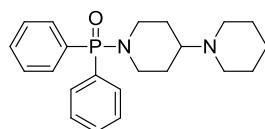

**3z**

**3z** (39 mg, 53%, reaction time: 8 h) ( $R_f$  0.5, dichloromethane/methanol 20/1 + 2% triethylamine) was prepared following the typical procedure in 0.20 mmol scale as yellow solid.  $^1\text{H NMR}$  (400 MHz,  $\text{CDCl}_3$ )  $\delta$  8.08-7.74 (m, 4 H), 7.58-7.32 (m, 6 H), 3.40-3.24 (m, 2 H), 2.83-2.66 (m, 2 H), 2.48 (t,  $J = 5.0$  Hz, 4 H), 2.42-2.26 (m, 1 H), 1.77 (bd,  $J = 12.0$  Hz, 2 H), 1.65-1.45 (m, 6 H), 1.45-1.31 (m, 2 H);  $^{13}\text{C NMR}$  (100 MHz,  $\text{CDCl}_3$ )  $\delta$  132.1 (d,  $J = 9.0$  Hz), 131.7 (d,  $J = 128.6$  Hz), 131.6 (d,  $J = 2.7$  Hz), 128.46 (d,  $J = 12.3$  Hz), 62.4, 50.1, 44.7, 28.7 (d,  $J = 7.3$  Hz), 26.2, 24.6;  $^{31}\text{P NMR}$  (162 MHz,  $\text{CDCl}_3$ )  $\delta$  28.92; HRMS (ESI) calcd. for  $\text{C}_{22}\text{H}_{30}\text{N}_2\text{OP}$   $[\text{M} + \text{H}]^+$ : 369.2096, found 369.2091.

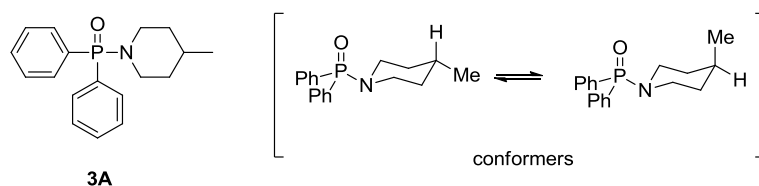

**3A** (40 mg, 67%, reaction time: 10 h) ( $R_f$  0.2, EA) was prepared following the typical procedure in 0.20 mmol scale as yellow oil. **Conformers were observed by NMR analysis.**  $^1\text{H}$  NMR (400 MHz,  $\text{CDCl}_3$ )  $\delta$  8.00-7.72 (m, 4 H), 7.60-7.37 (m, 6 H), 3.77-3.67 (m, 0.7 H), 3.49-3.40 (m, 0.3 H), 3.17-3.09 (m, 0.3 H), 3.07-2.96 (m, 0.7 H), 2.88-2.77 (m, 0.7 H), 2.60 (td,  $J$  = 12.4, 2.4 Hz, 0.3 H), 2.25-2.09 (m, 1 H), 1.90-1.79 (m, 1 H), 1.79-1.41 (m, 3 H), 1.34-1.23 (m, 1 H), 0.99 (d,  $J$  = 6.8 Hz, 2 H), 0.87 (d,  $J$  = 6.4 Hz, 1 H);  $^{13}\text{C}$  NMR (100 MHz,  $\text{CDCl}_3$ )  $\delta$  131.9 (d,  $J$  = 3.2 Hz), 131.80 (d,  $J$  = 91.8 Hz), 131.79 (d,  $J$  = 1.8 Hz), 131.7 (d,  $J$  = 2.7 Hz), 131.6 (d,  $J$  = 8.5 Hz), 131.4 (d,  $J$  = 8.8 Hz), 131.2 (d,  $J$  = 8.5 Hz), 128.6 (d,  $J$  = 2.4 Hz), 128.5 (d,  $J$  = 1.7 Hz), 128.4, 56.8, 56.0, 51.5, 50.7, 47.5 (d,  $J$  = 14.3 Hz), 41.9 (d,  $J$  = 10.0 Hz), 34.9, 33.5, 32.4, 31.6 (d,  $J$  = 12.5 Hz), 31.5, 25.8 (d,  $J$  = 8.5 Hz), 22.5, 18.7;  $^{31}\text{P}$  NMR (162 MHz,  $\text{CDCl}_3$ )  $\delta$  32.73, 31.19; HRMS (ESI) calcd. for  $\text{C}_{18}\text{H}_{23}\text{NOP}$   $[\text{M} + \text{H}]^+$ : 300.1517, found 300.1515.

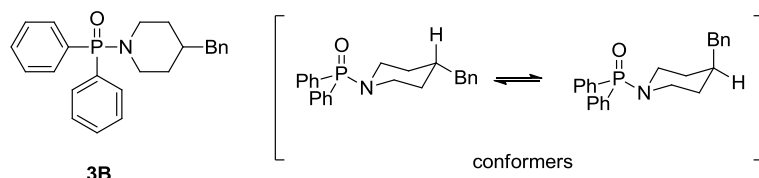

**3B** (41 mg, 55%, reaction time: 7 h) ( $R_f$  0.2, EA) was prepared following the typical procedure in 0.20 mmol scale as yellow oil. **Conformers were observed by NMR analysis.**  $^1\text{H}$  NMR (400 MHz,  $\text{CDCl}_3$ )  $\delta$  8.05-7.83 (m, 2 H), 7.83-7.65 (m, 2 H), 7.59-7.45 (m, 4 H), 7.45-7.35 (m, 1 H), 7.33-7.00 (m, 6 H), 3.78-3.70 (m, 0.7 H), 3.48-3.40 (m, 0.3 H), 3.16-3.04 (m, 1 H), 2.97-2.84 (m, 1 H), 2.76-2.59 (m, 1 H), 2.58-2.47 (m, 1 H), 2.44-2.26 (m, 1 H), 1.87-1.74 (m, 2 H), 1.74-1.61 (m, 1 H), 1.61-1.48 (m, 1 H), 1.44-1.25 (m, 1 H);  $^{13}\text{C}$  NMR (100 MHz,  $\text{CDCl}_3$ )  $\delta$  140.4, 131.9 (d,  $J$  = 2.6 Hz), 131.7 (d,  $J$  = 2.9 Hz), 131.6 (d,  $J$  = 8.5 Hz), 131.2 (d,  $J$  = 8.7 Hz), 129.0 128.59 (dd,  $J$  = 12.3, 11.4 Hz), 128.58 (d,  $J$  = 89.2 Hz), 128.2, 51.9, 51.1, 42.2 (d,  $J$  = 9.4 Hz), 39.2, 33.2 (d,  $J$  = 8.1 Hz), 30.4, 29.3;  $^{31}\text{P}$  NMR (162 MHz,  $\text{CDCl}_3$ )  $\delta$  32.88, 31.36; HRMS (ESI) calcd. for  $\text{C}_{24}\text{H}_{27}\text{NOP}$   $[\text{M} + \text{H}]^+$ : 376.1830, found 376.1832.

# <sup>1</sup>H NMR of 3a

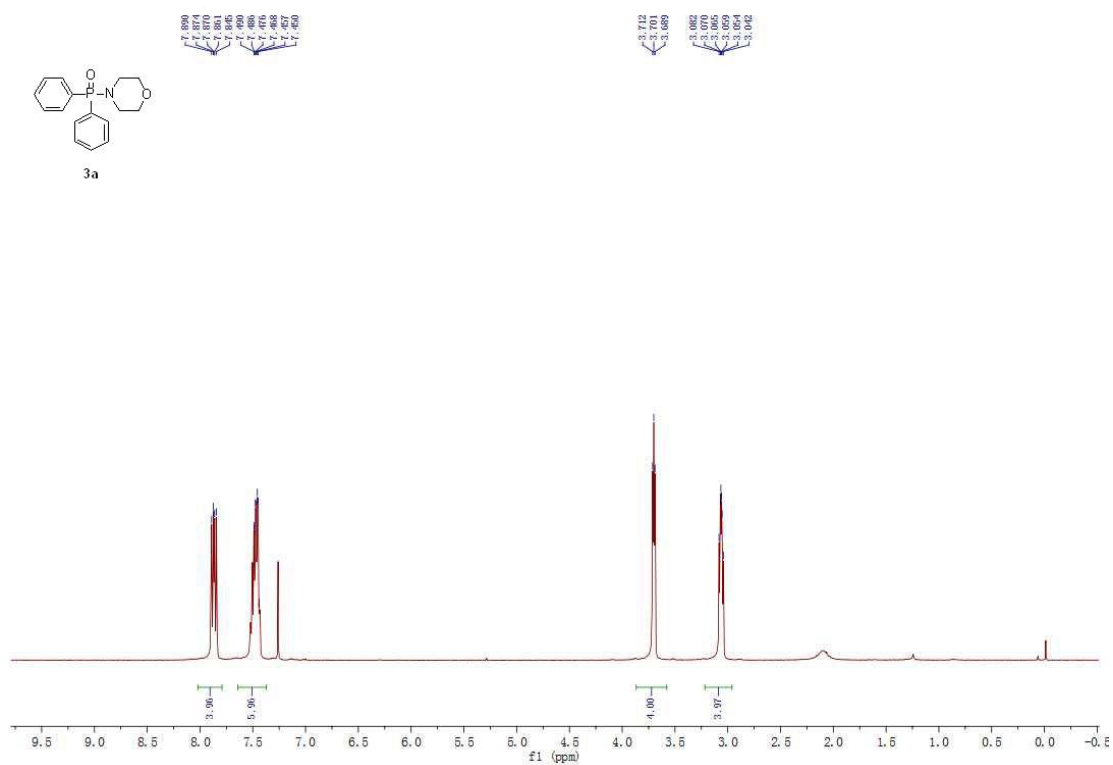

# <sup>13</sup>C NMR of 3a

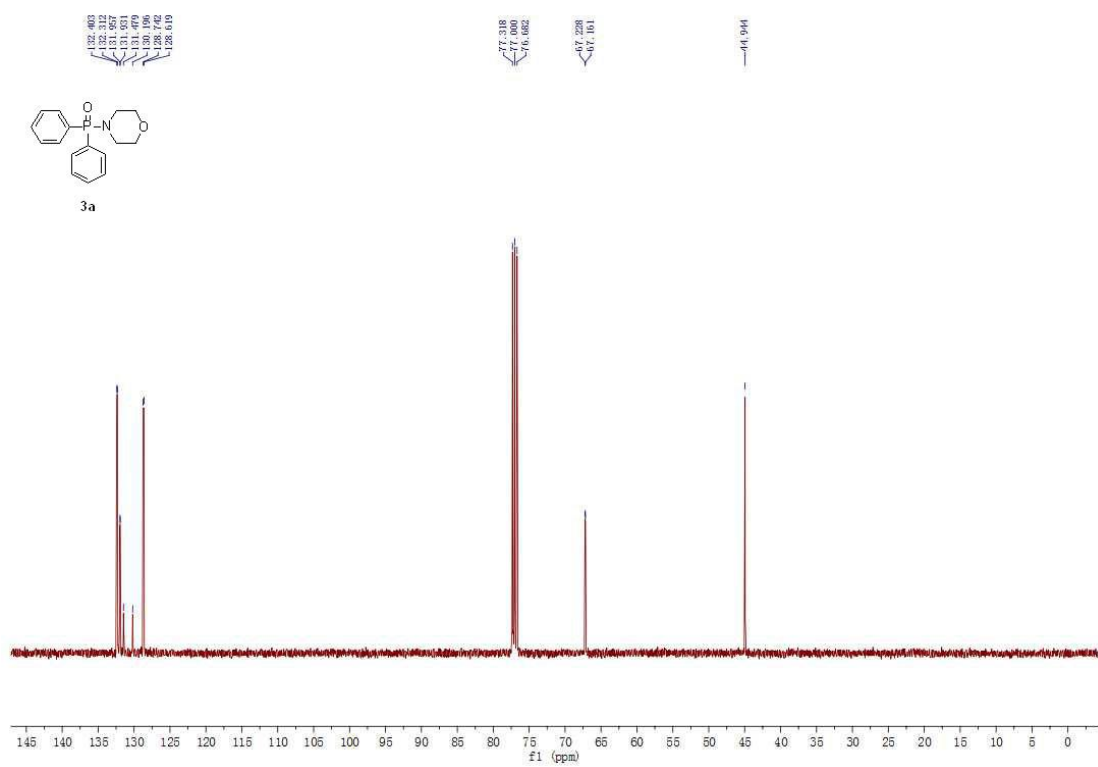

### $^{31}\text{P}$ NMR of **3a**

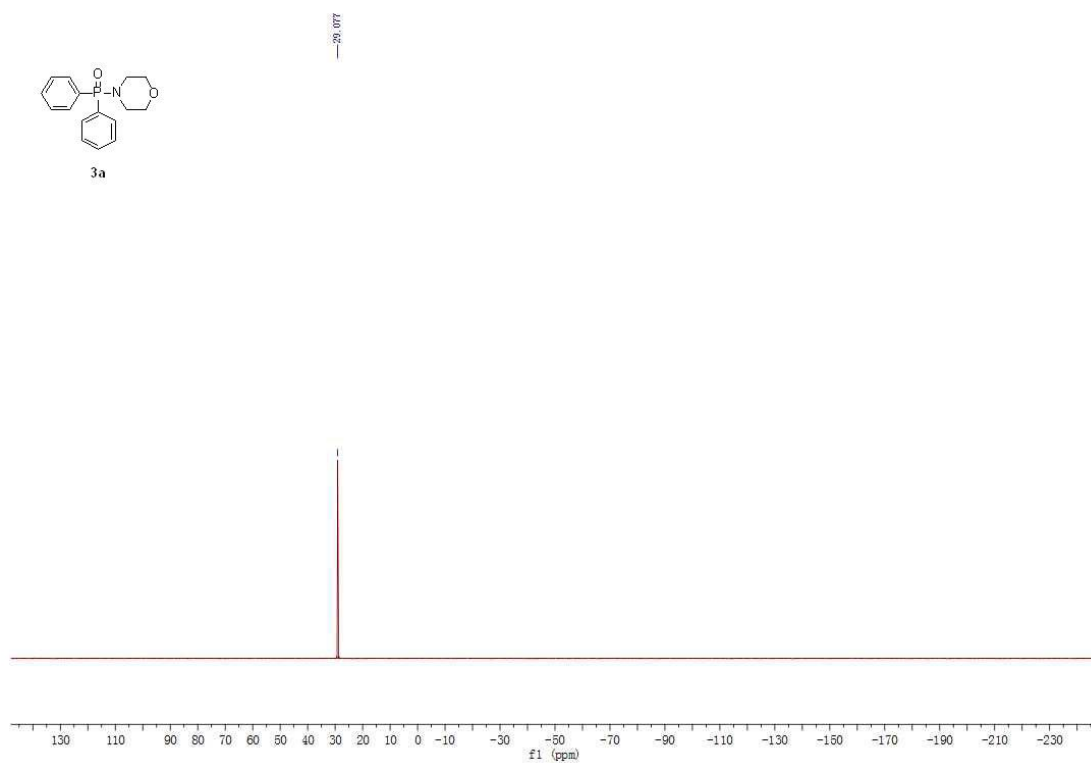

### $^1\text{H}$ NMR of **3b**

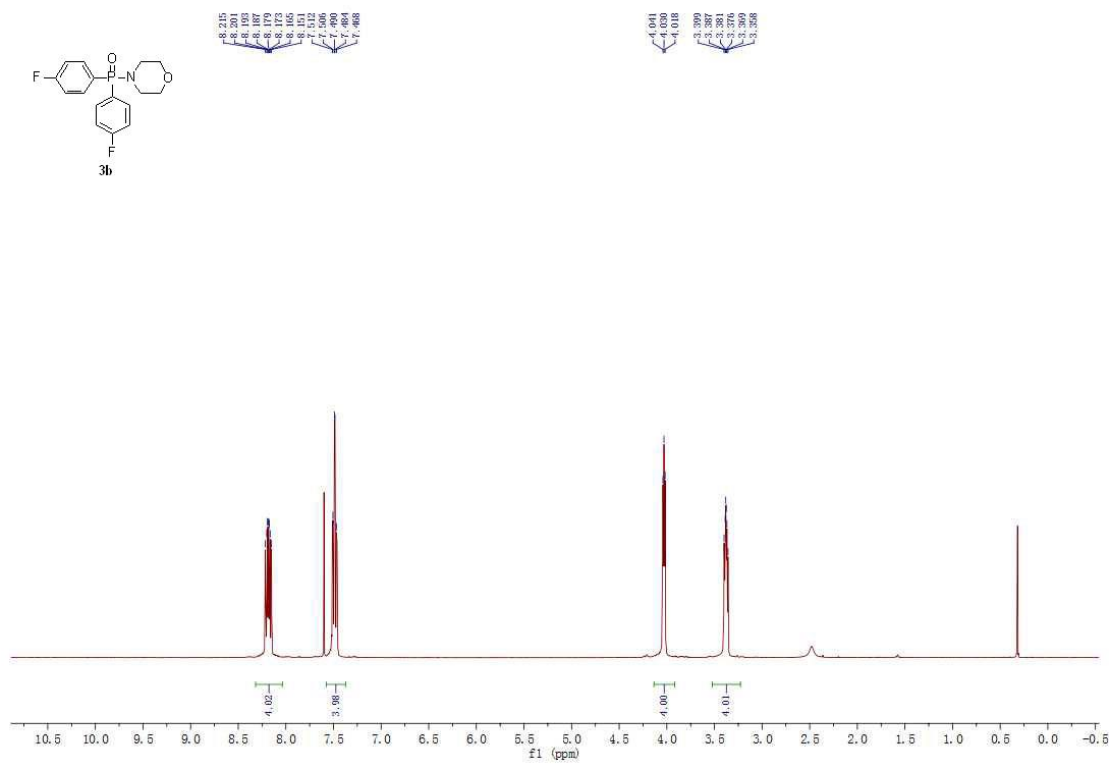

# <sup>13</sup>C NMR of **3b**

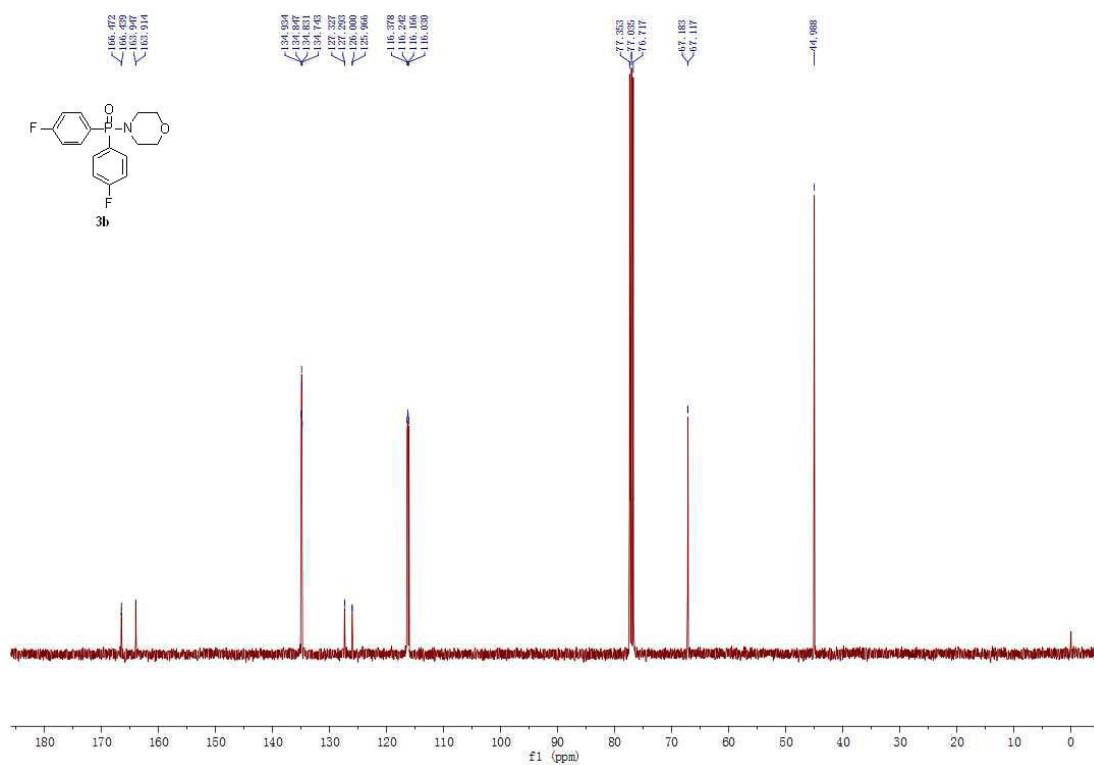

# <sup>19</sup>F NMR of **3b**

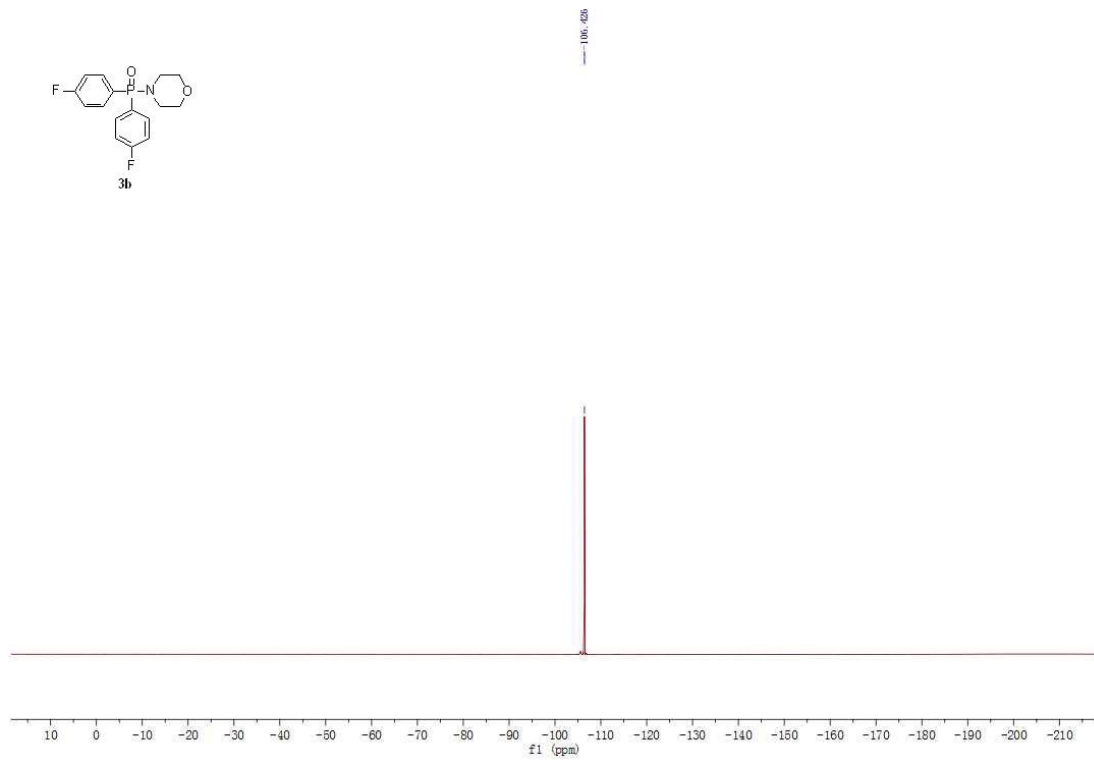



# $^{13}\text{C}$ NMR of **3c**

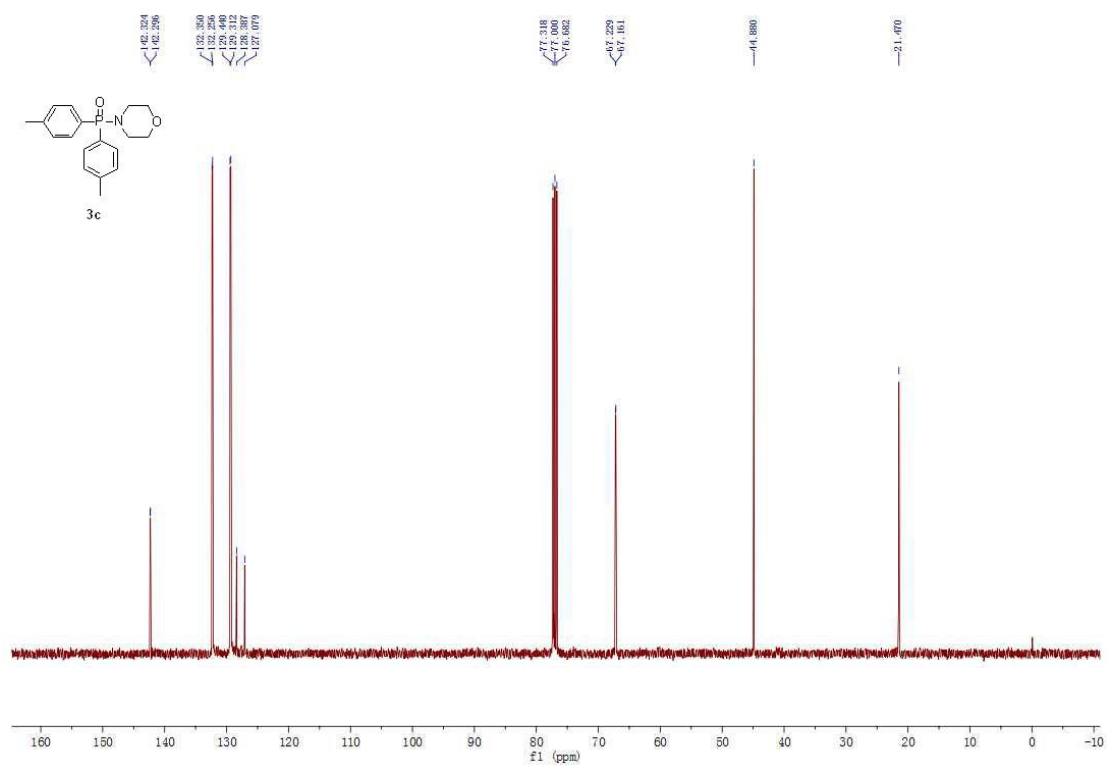

# $^{31}\text{P}$ NMR of **3c**

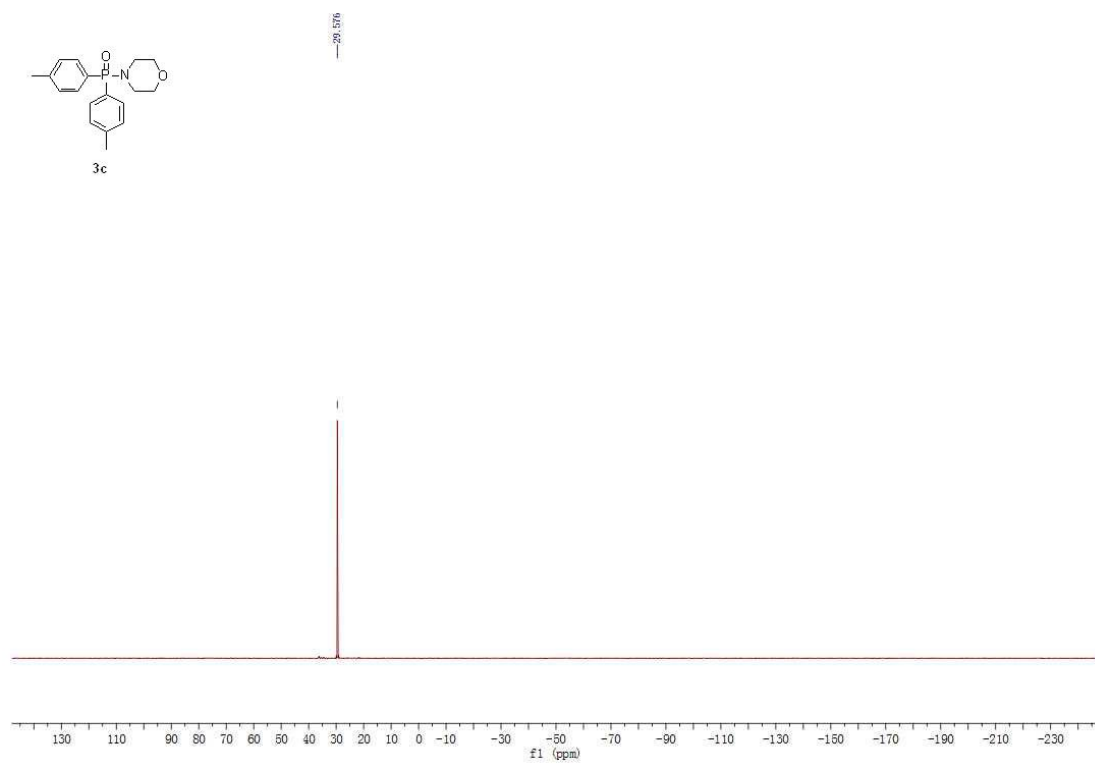

# <sup>1</sup>H NMR of **3d**

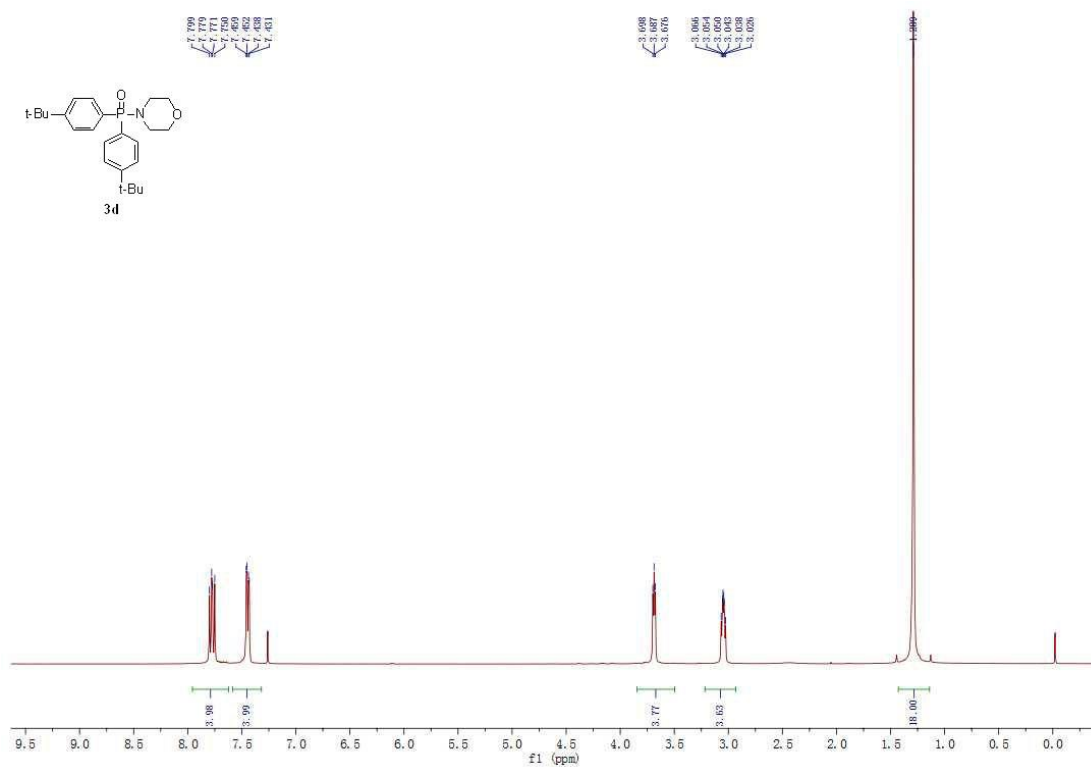

# <sup>13</sup>C NMR of **3d**

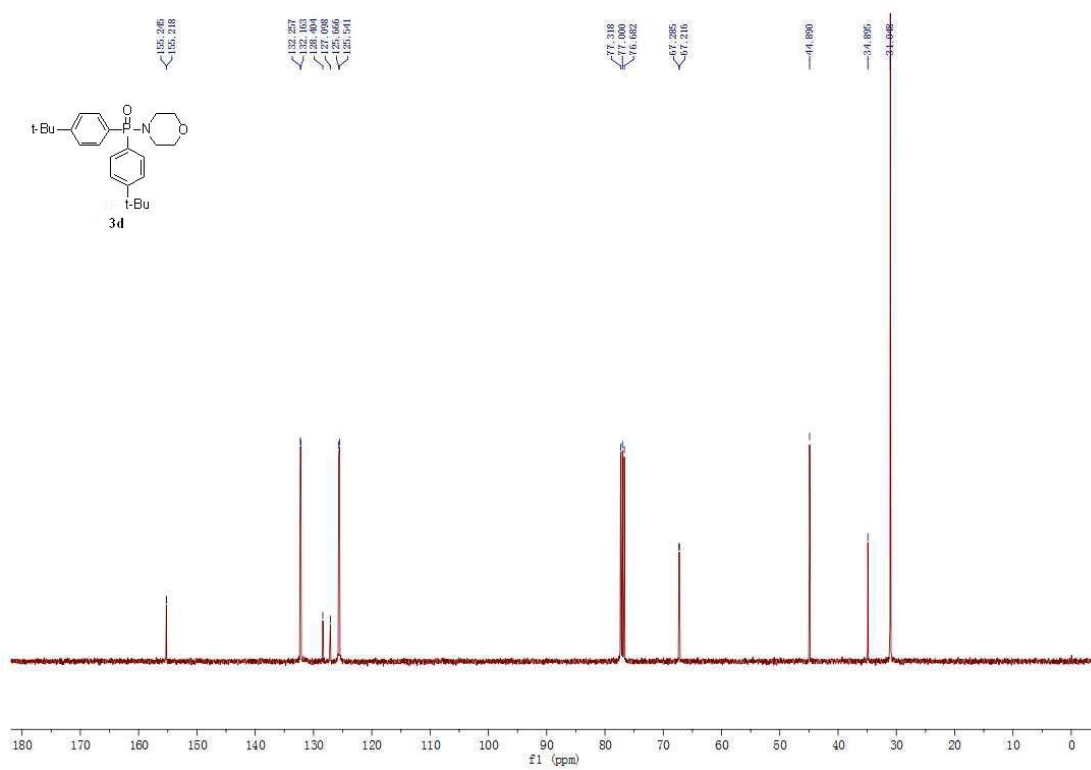



### $^{31}\text{P}$ NMR of **3d**

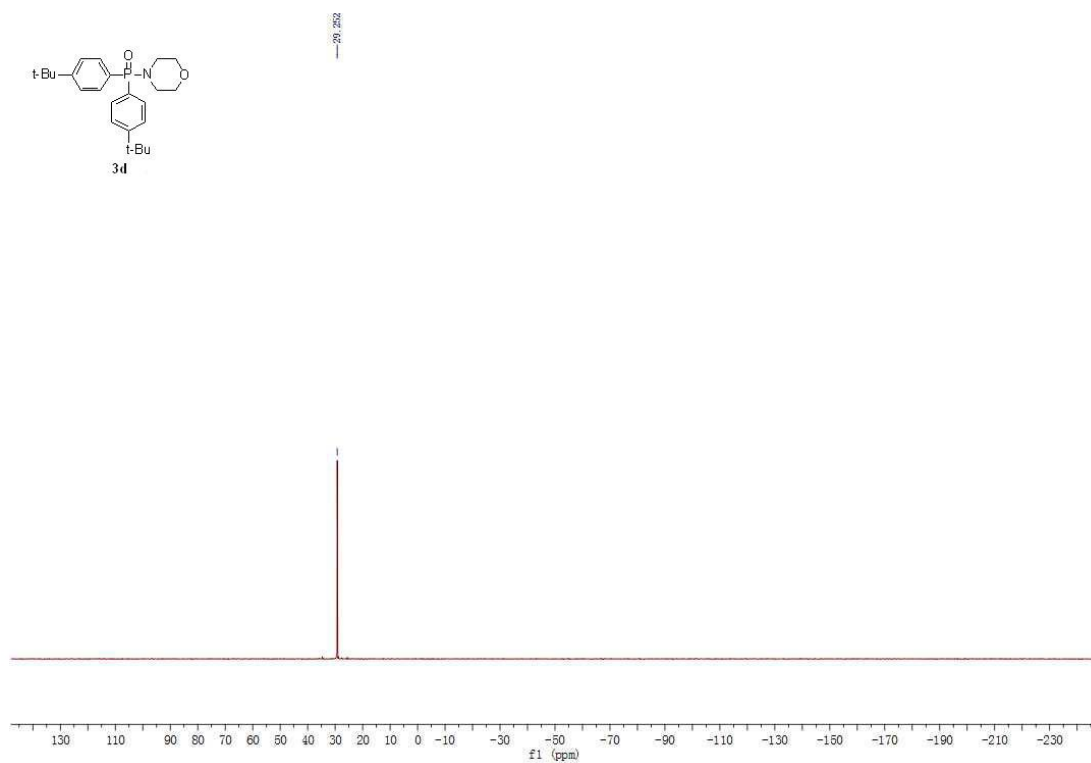

### $^1\text{H}$ NMR of **3e**

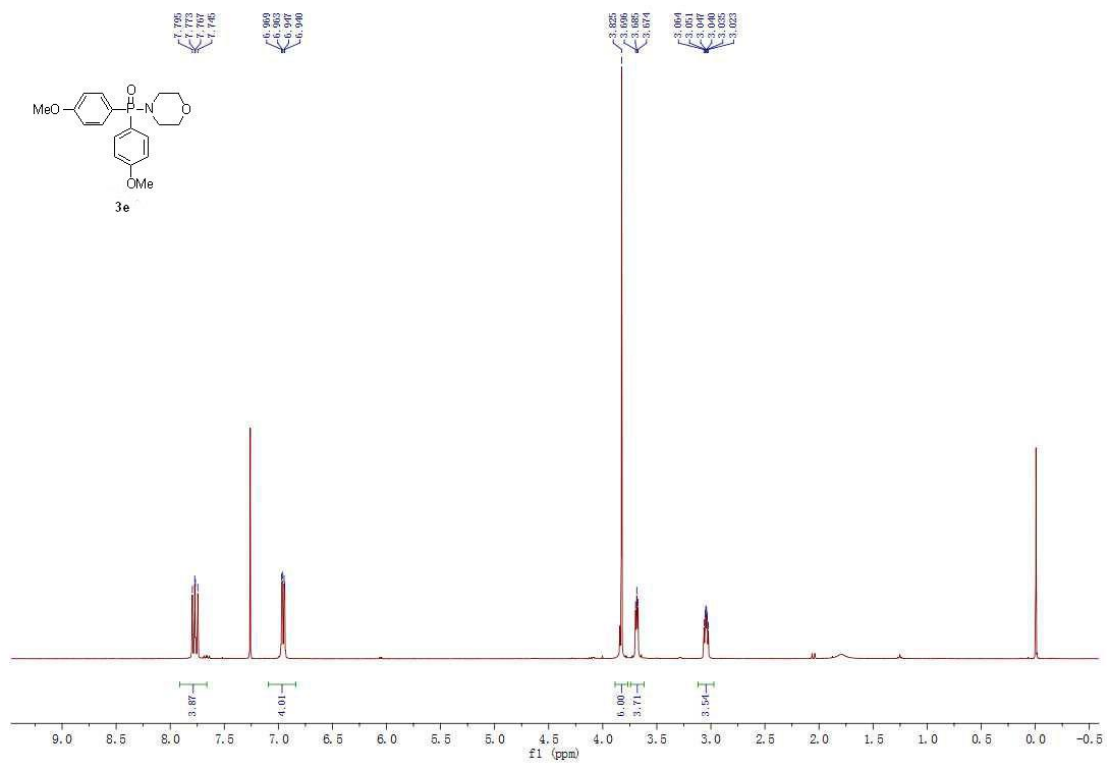

<sup>13</sup>C NMR of **3e**

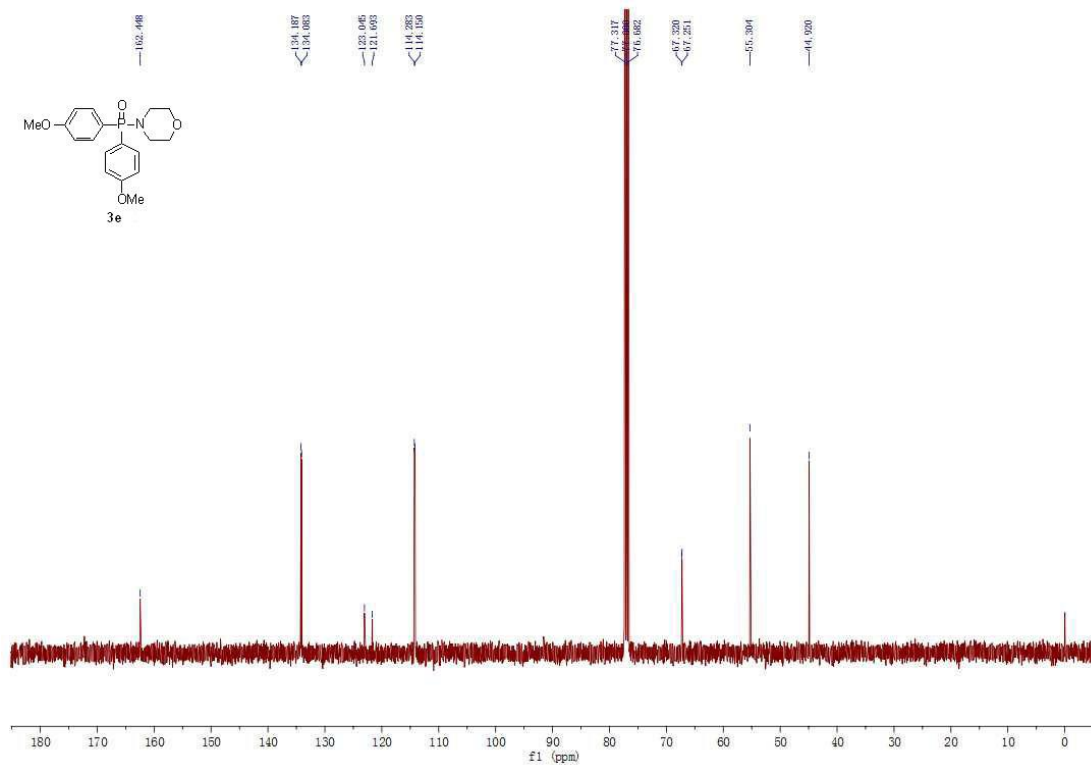

<sup>31</sup>P NMR of **3e**

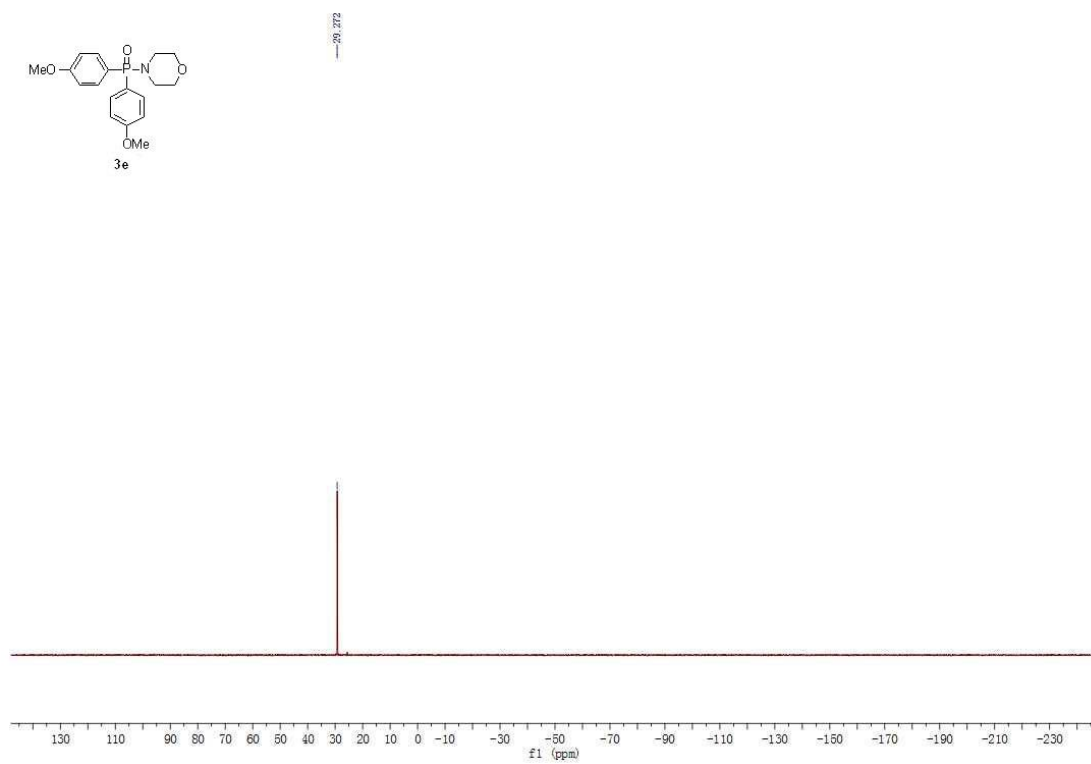

# <sup>1</sup>H NMR of **3f**

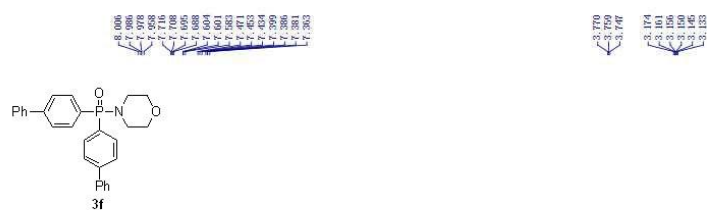

# <sup>13</sup>C NMR of **3f**

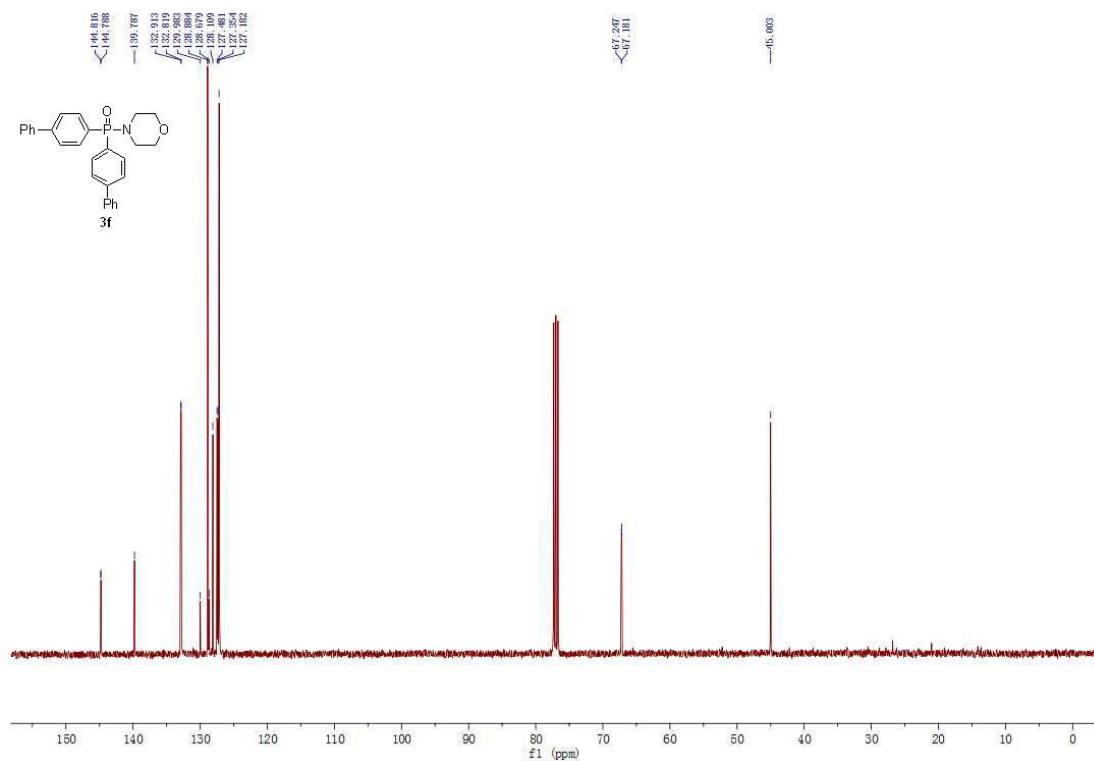

# $^{31}\text{P}$ NMR of **3f**

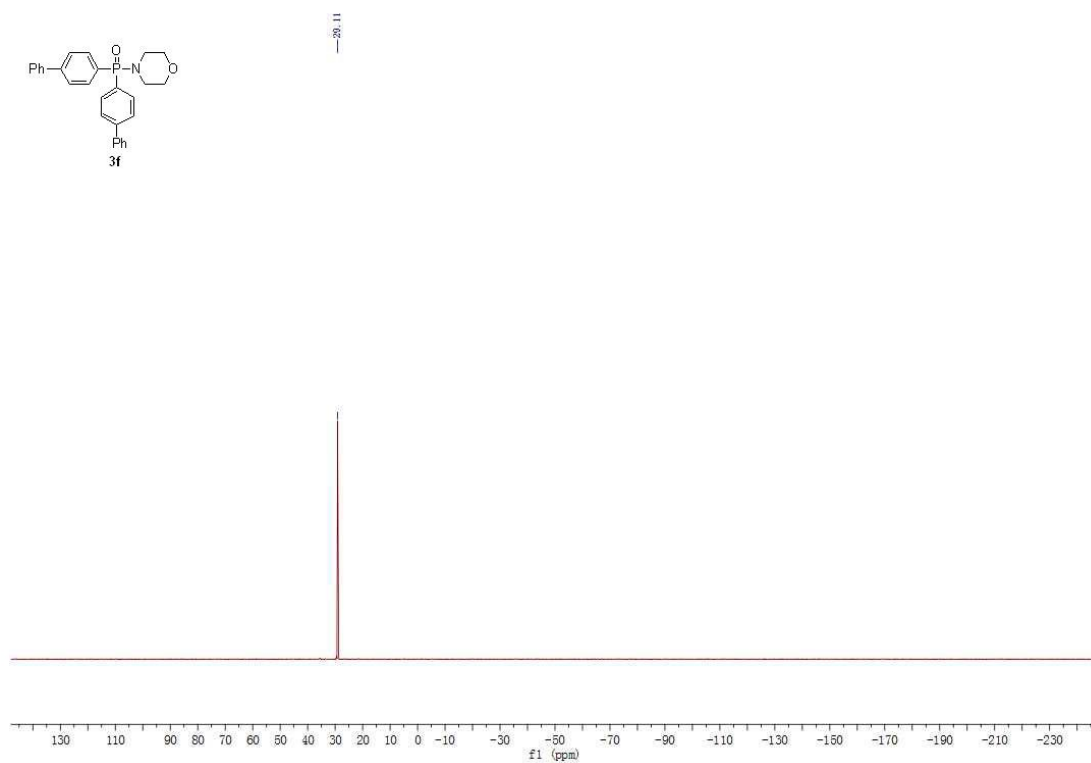

# $^1\text{H}$ NMR of **3g**

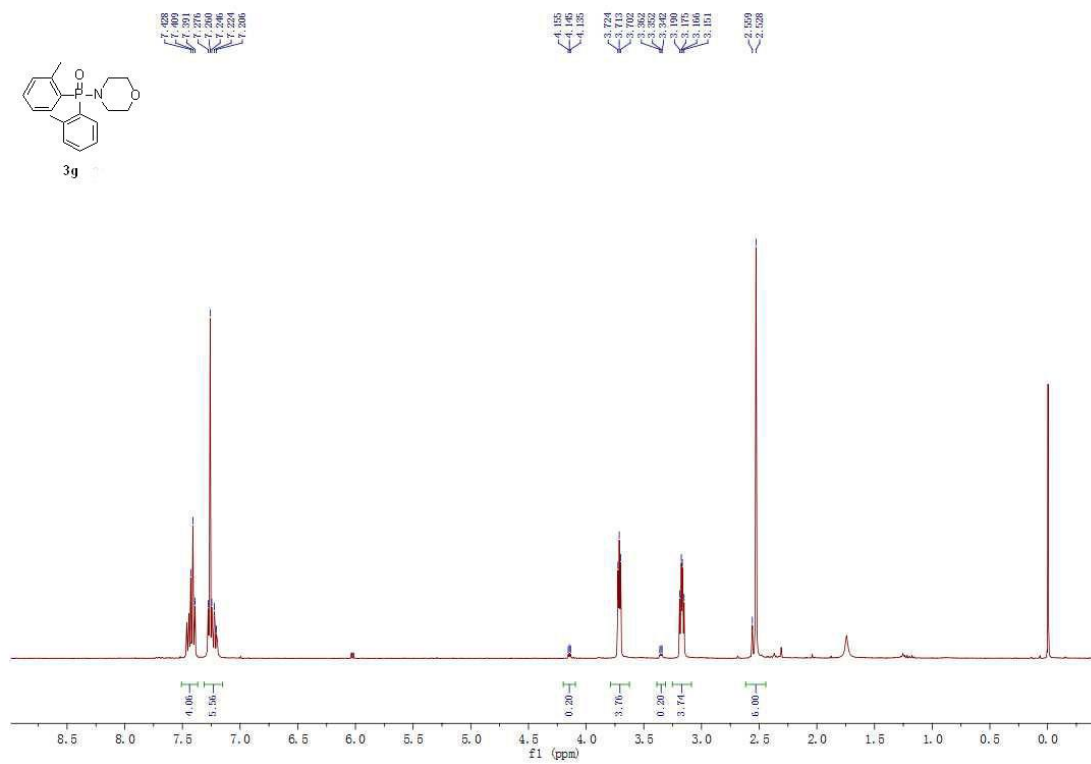

# $^{13}\text{C}$ NMR of **3g**

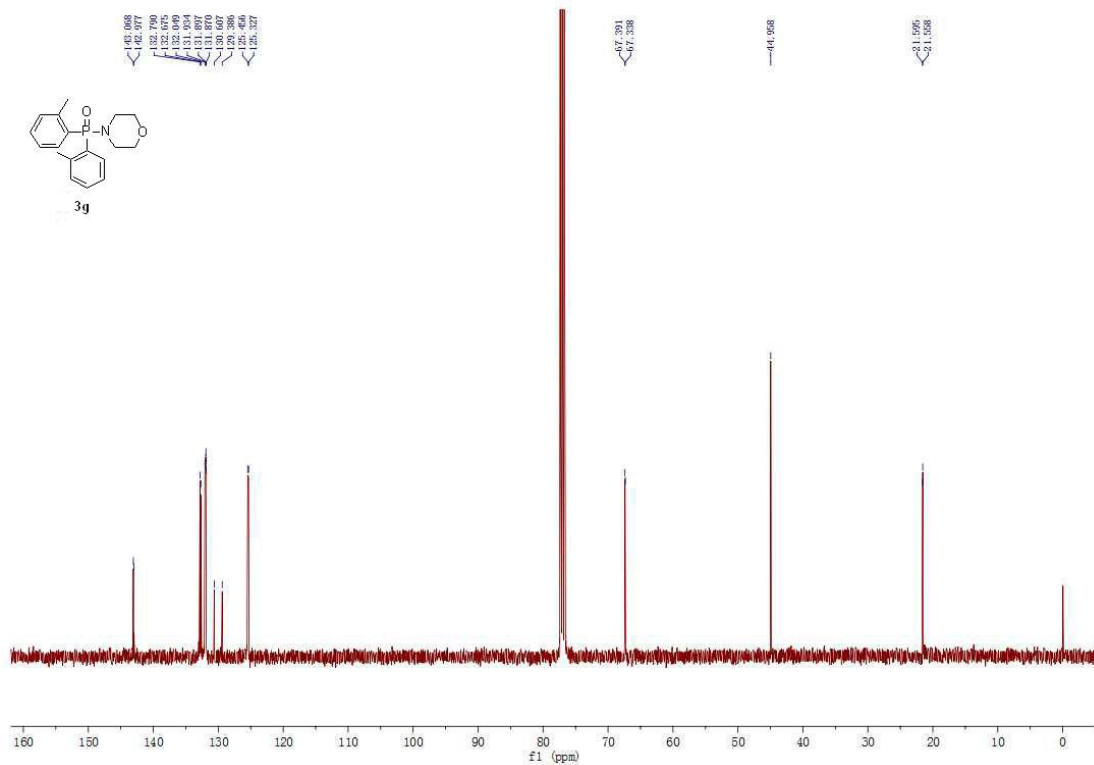

# $^{31}\text{P}$ NMR of **3g**

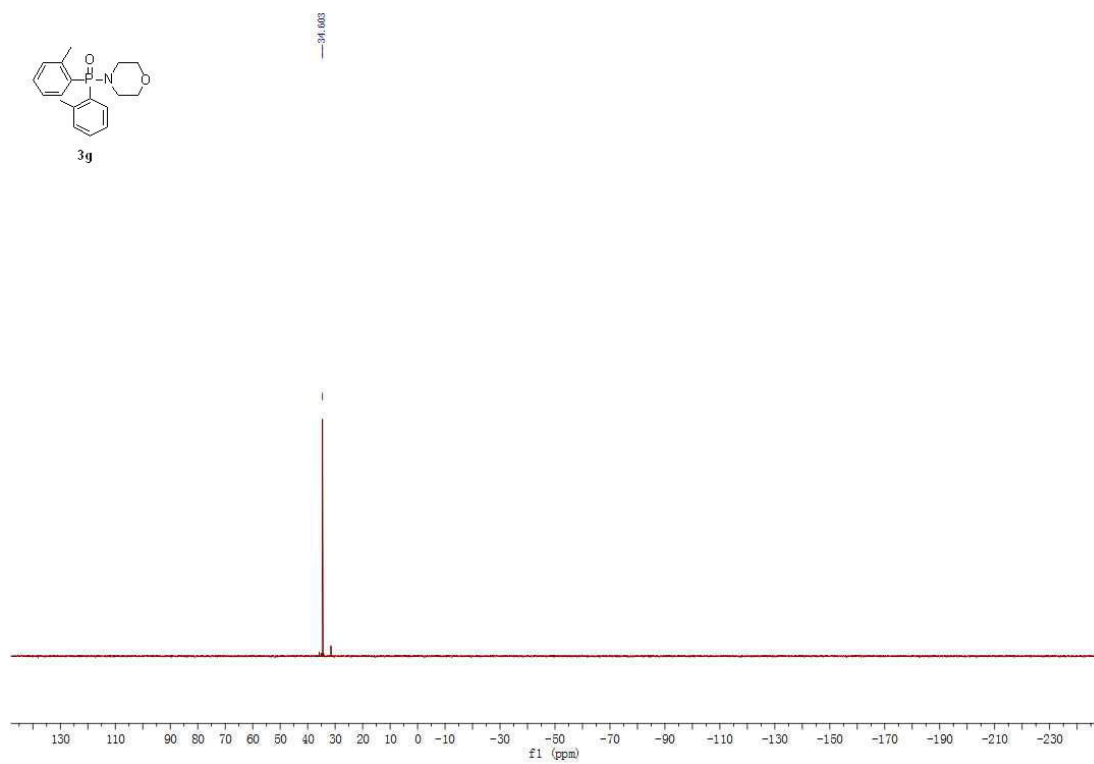

### $^1\text{H}$ NMR of **3h**

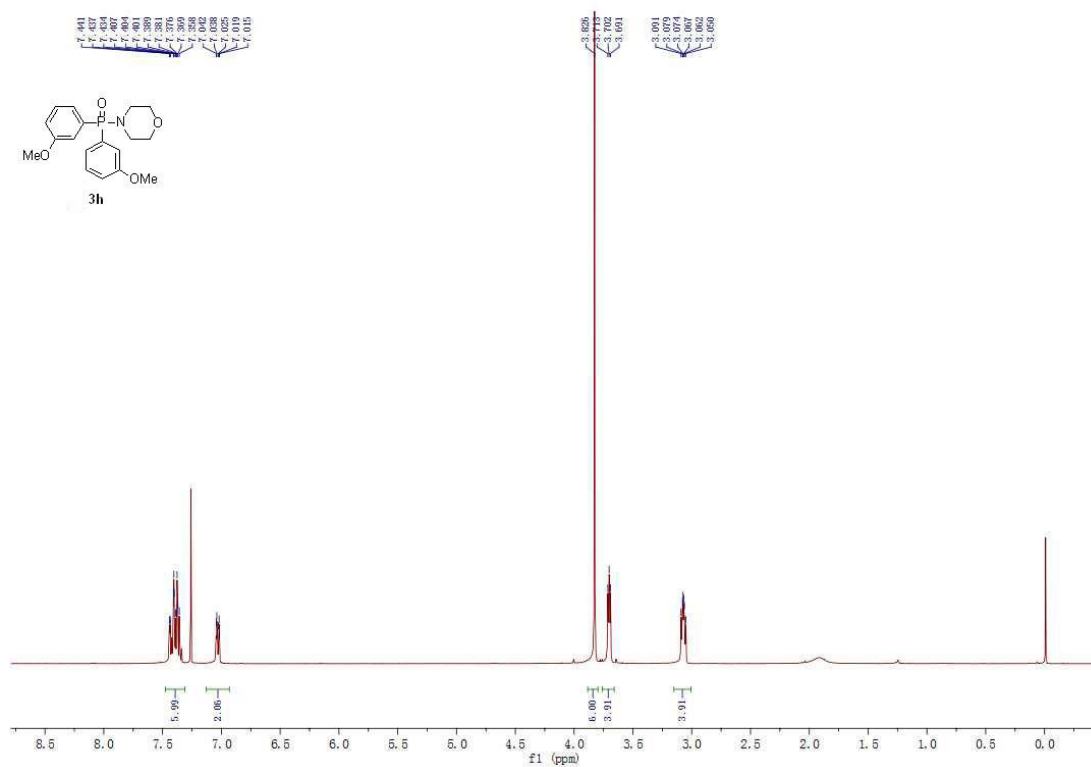

### $^{13}\text{C}$ NMR of **3h**

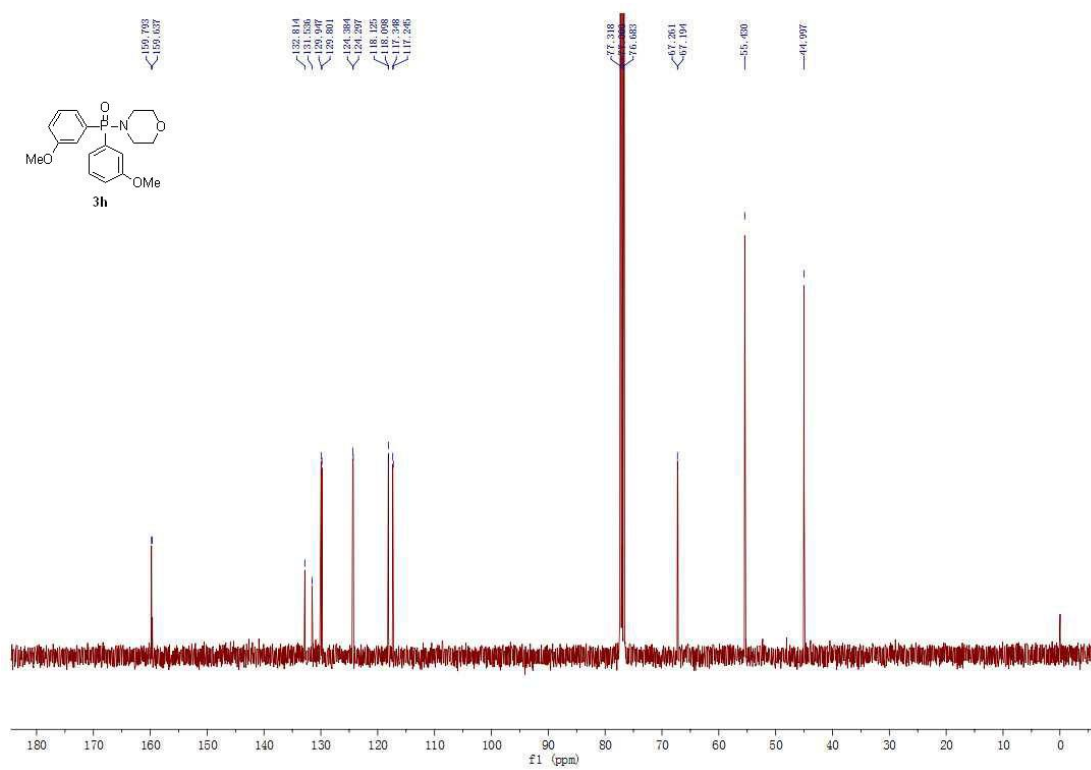

# <sup>31</sup>P NMR of **3h**

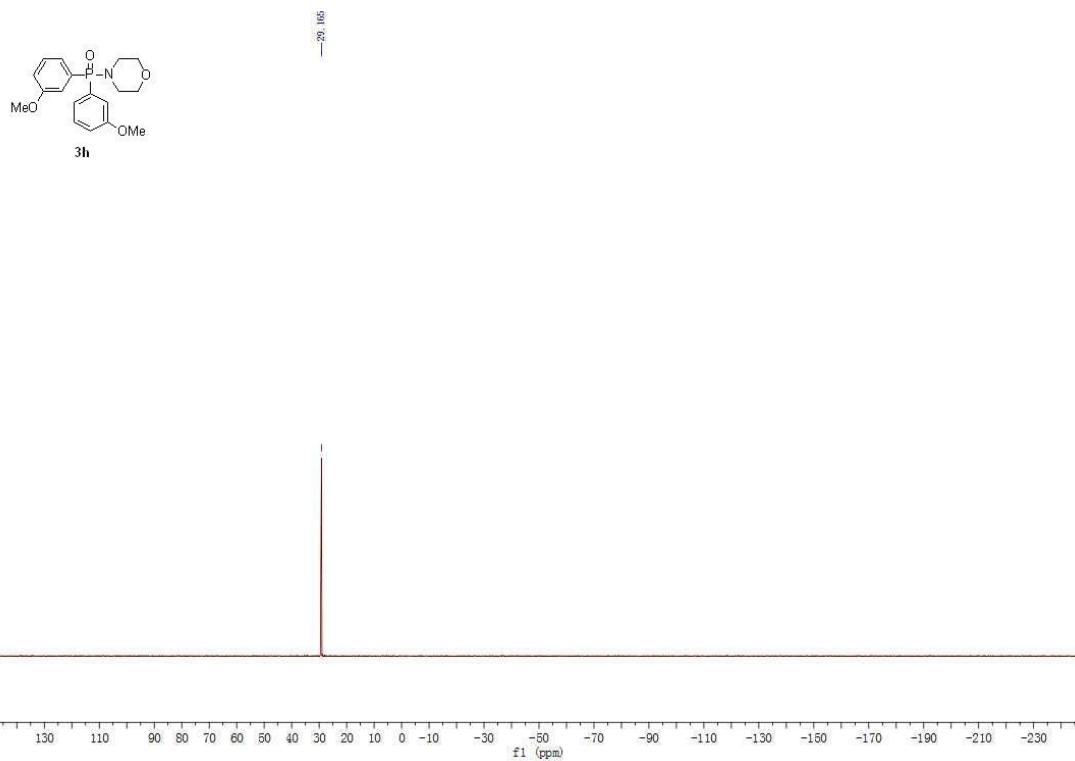

# <sup>1</sup>H NMR of **3i**

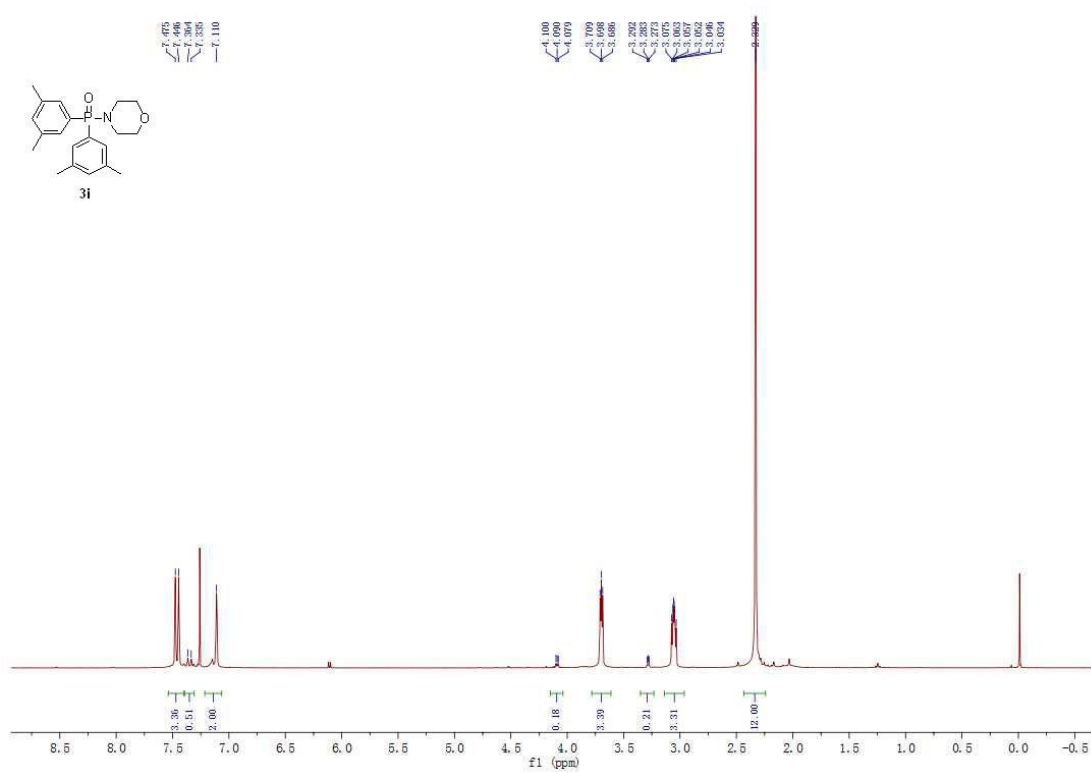

# <sup>13</sup>C NMR of **3i**

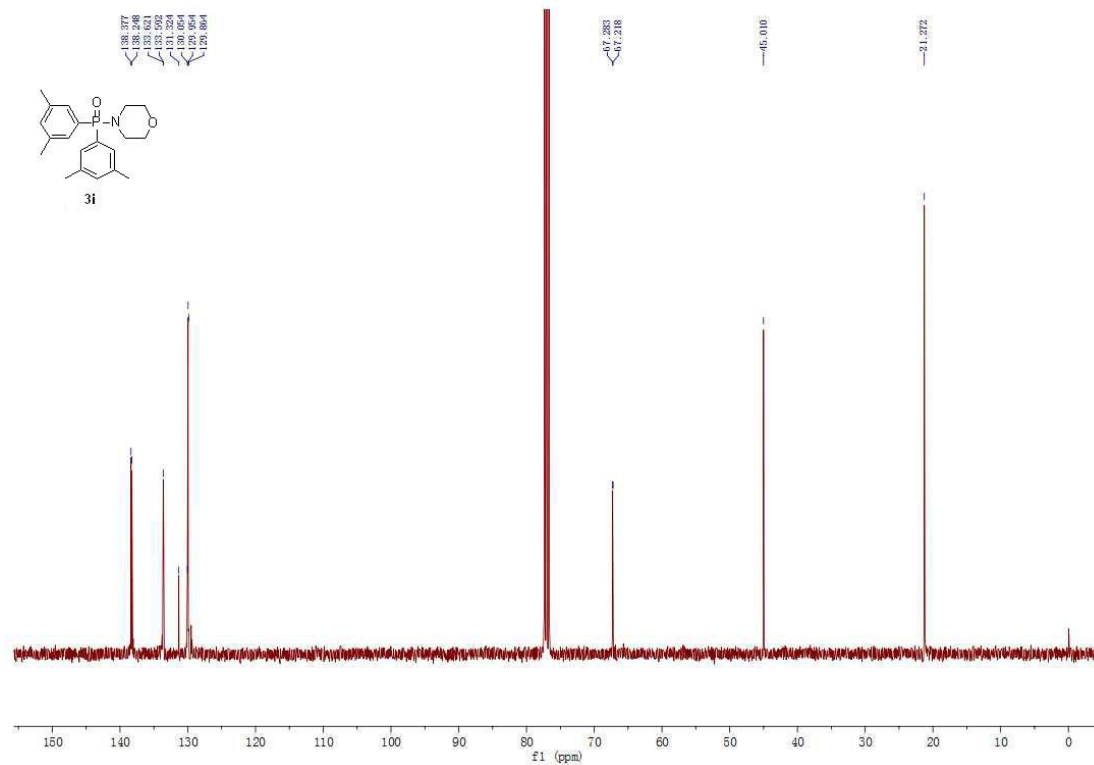

# <sup>31</sup>P NMR of **3i**

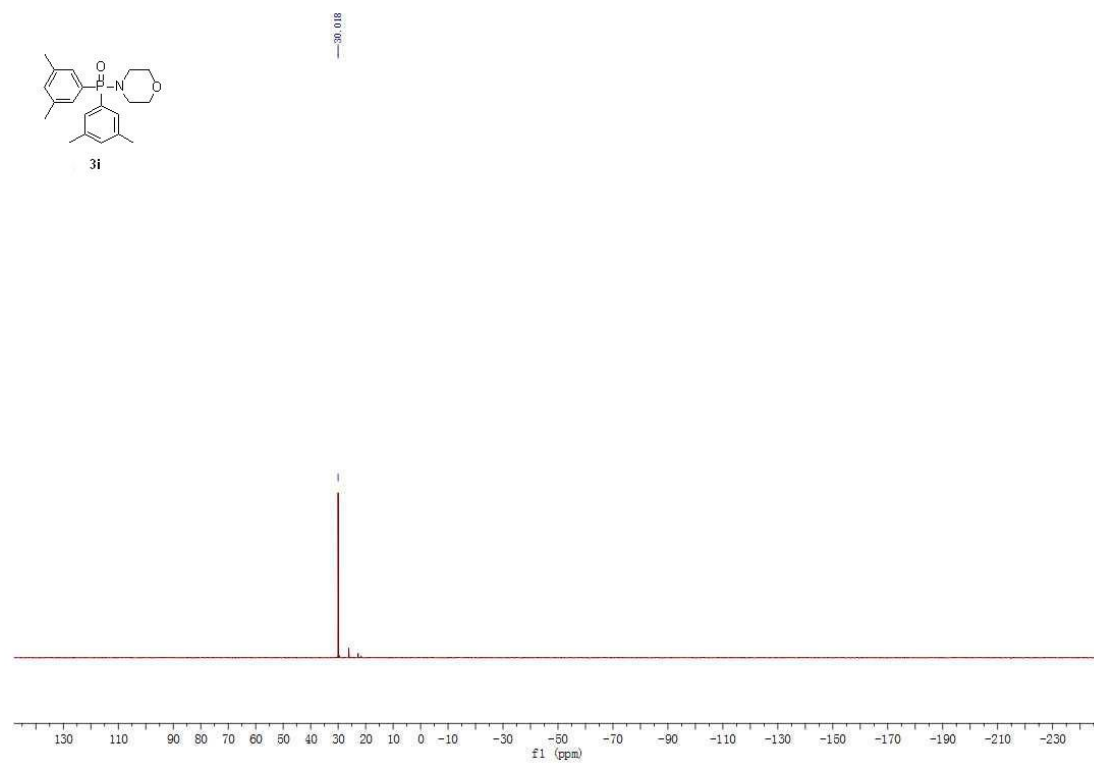



# <sup>1</sup>H NMR of 3j

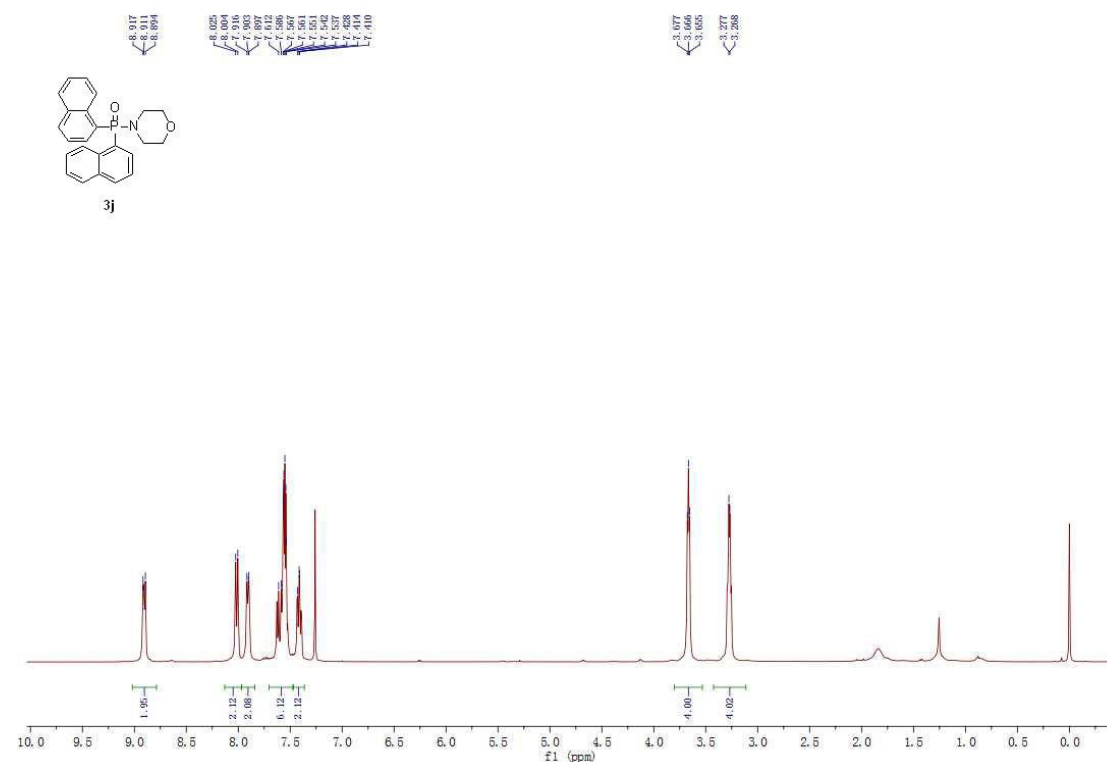

# <sup>13</sup>C NMR of 3j

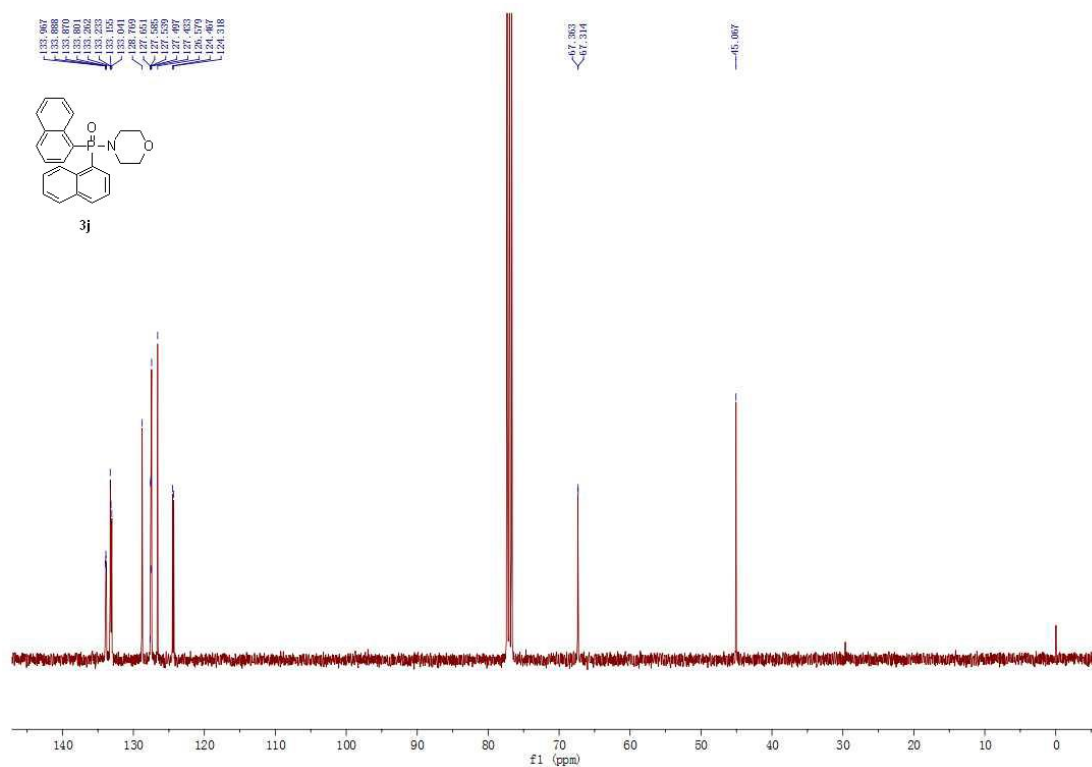

# <sup>31</sup>P NMR of **3j**

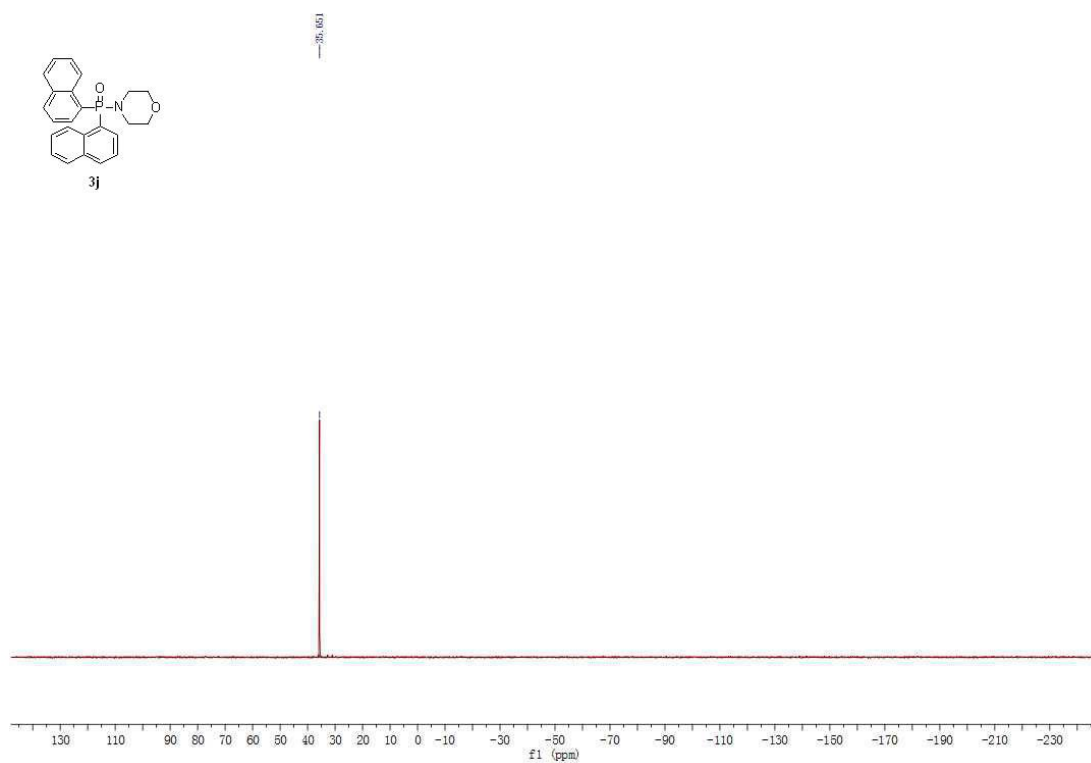

# <sup>1</sup>H NMR of **3k**

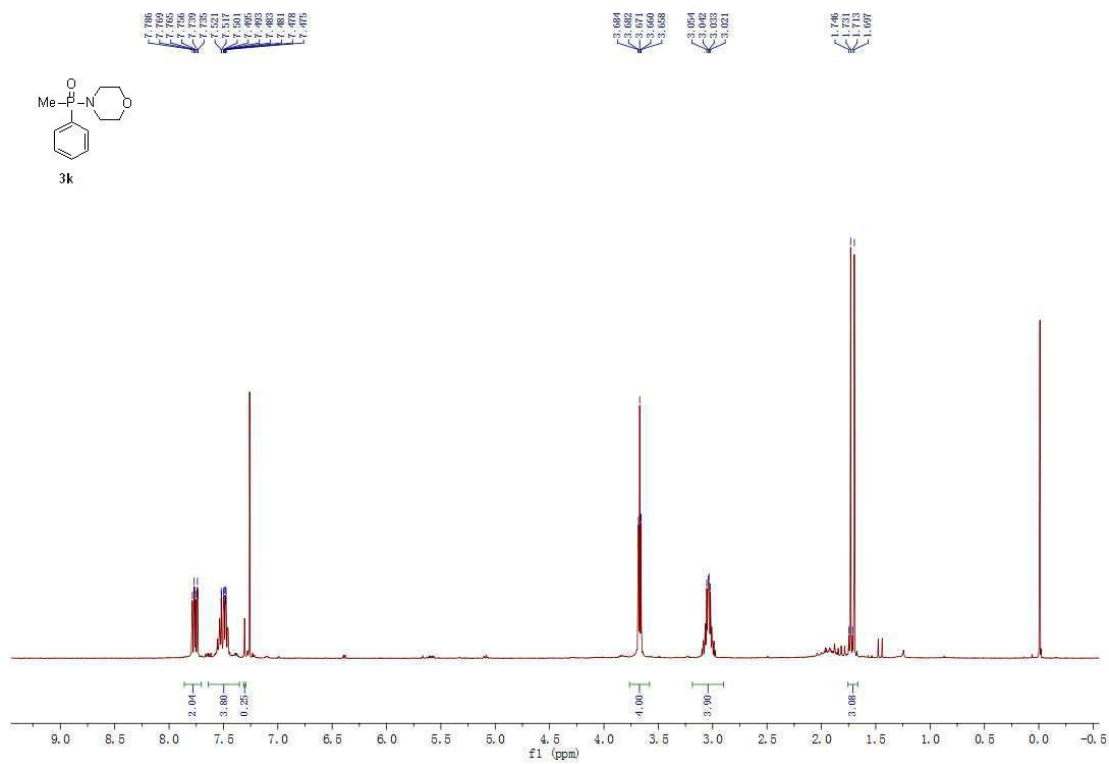

<sup>13</sup>C NMR of **3k**

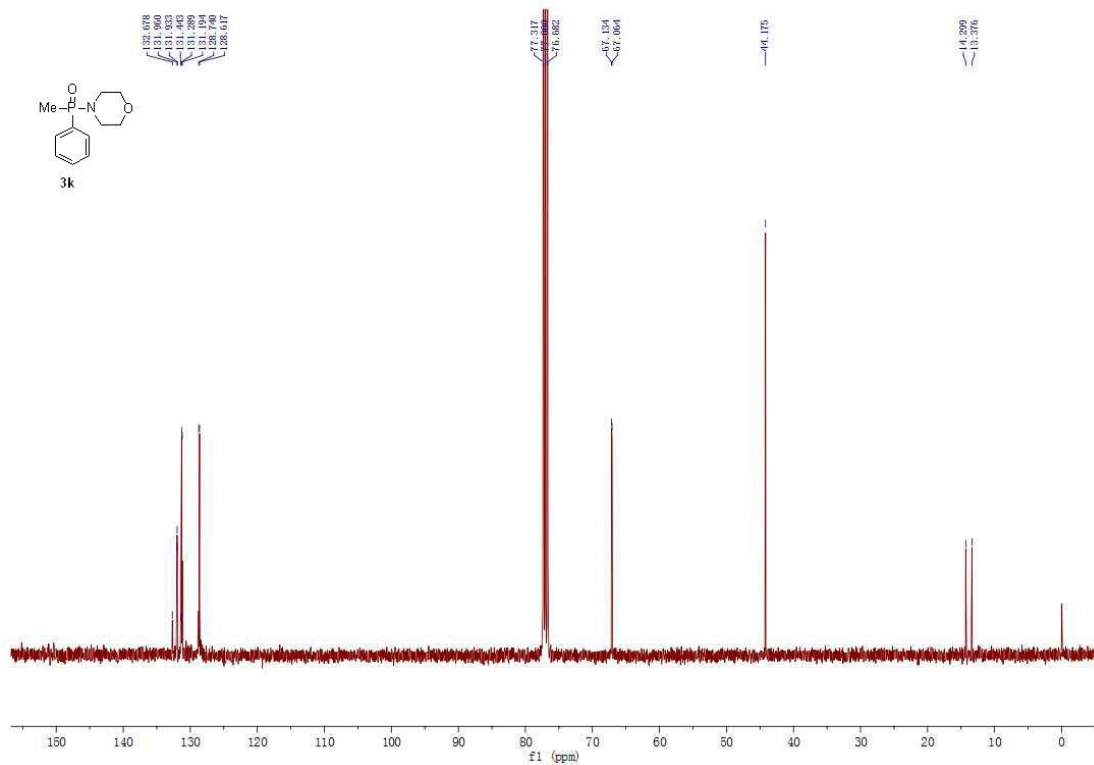

<sup>31</sup>P NMR of **3k**

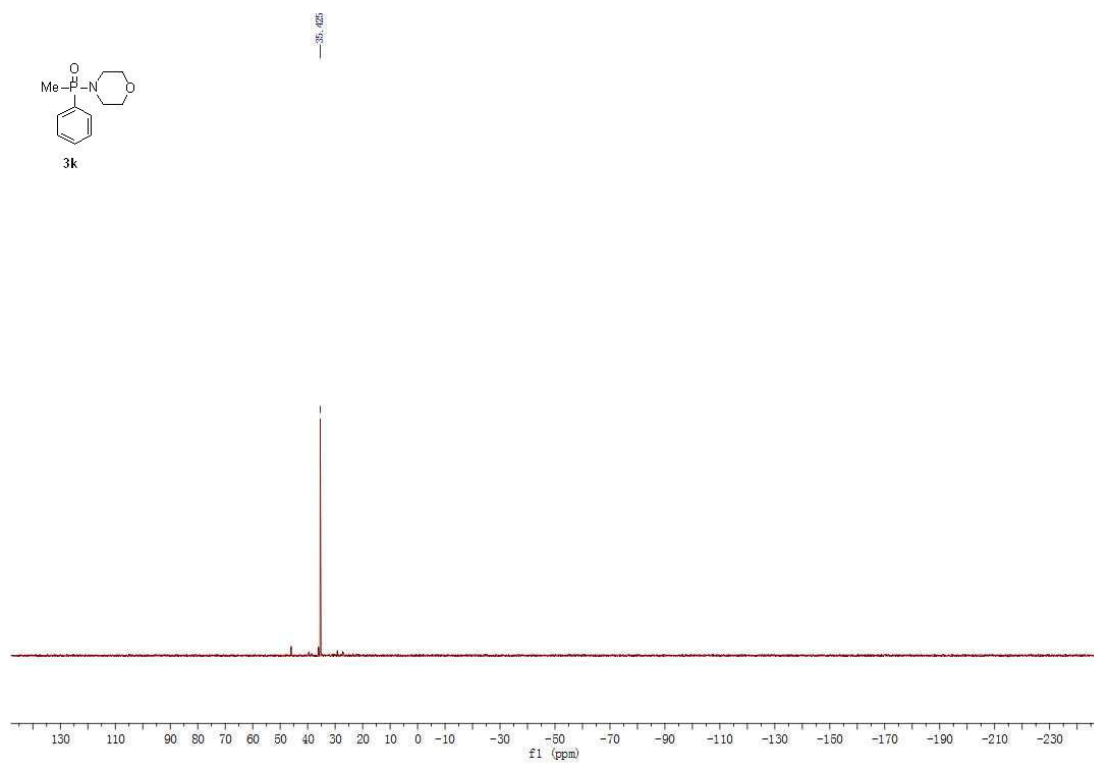

<sup>1</sup>H NMR of **3l**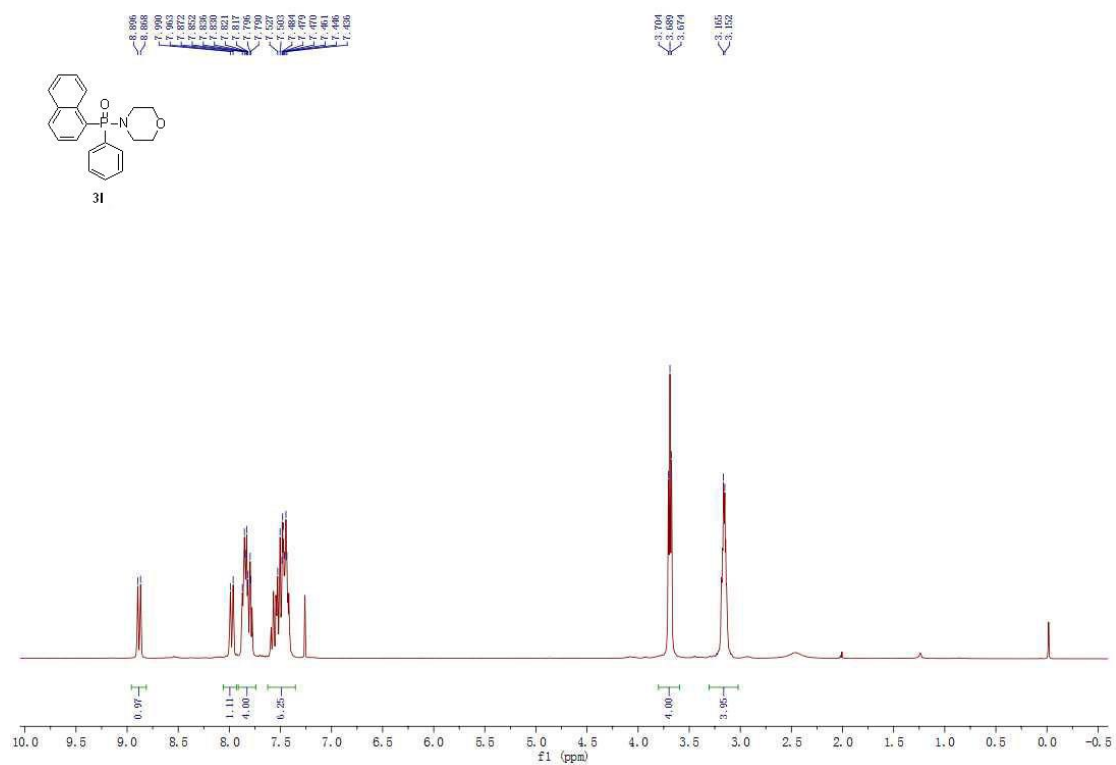<sup>13</sup>C NMR of **31**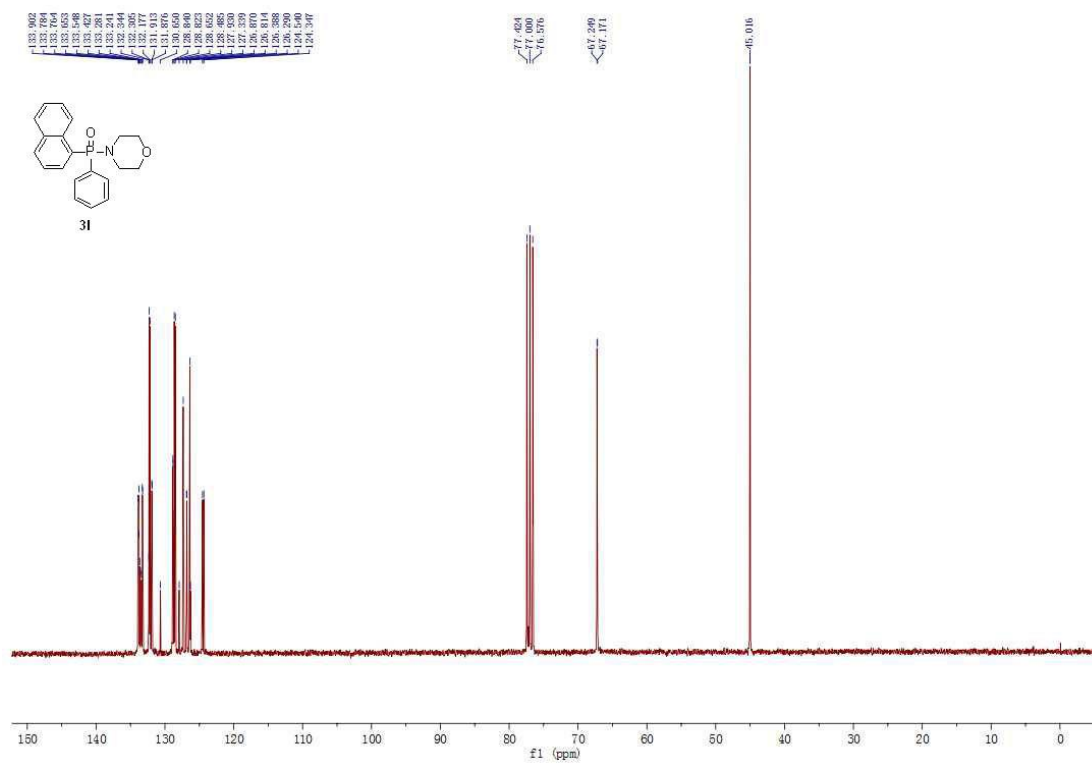

# <sup>31</sup>P NMR of **3l**

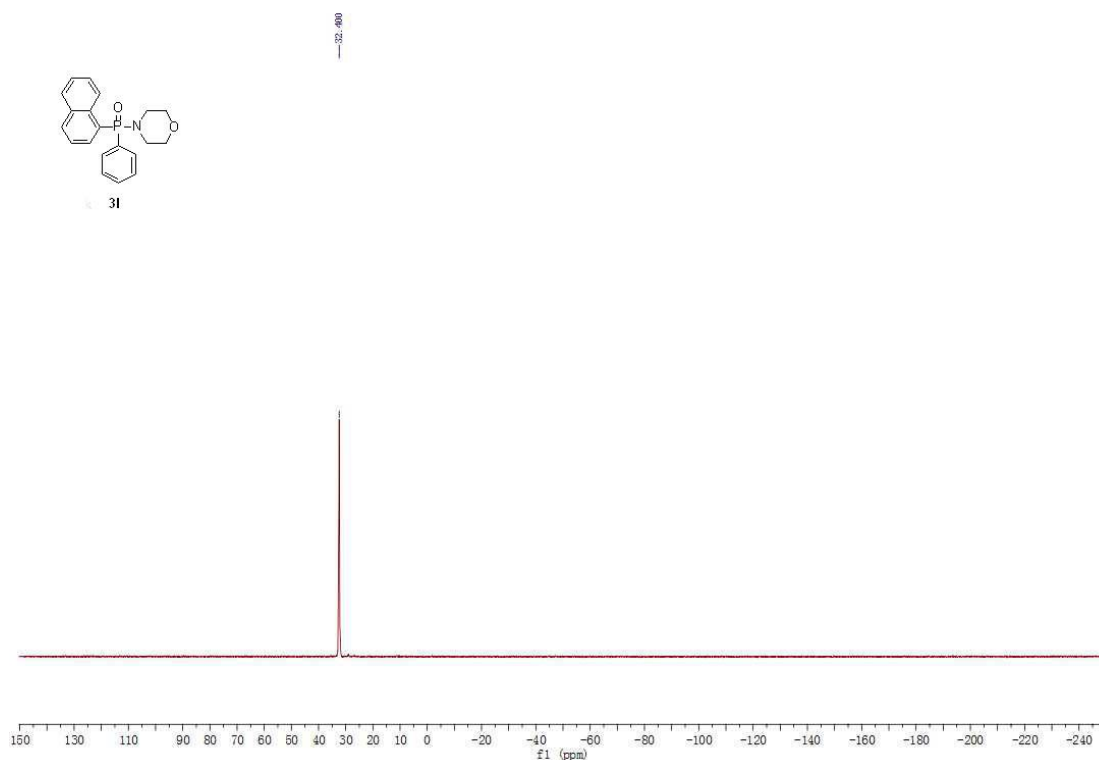

# <sup>1</sup>H NMR of **3m**

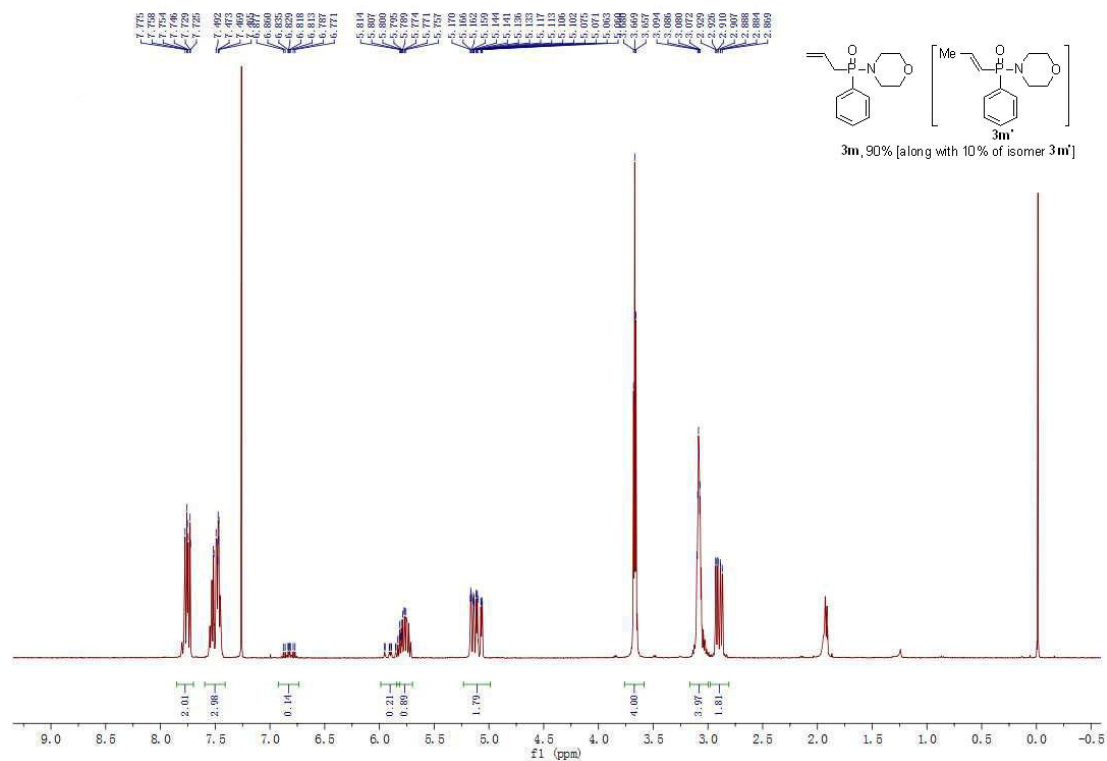

<sup>13</sup>C NMR of **3m**

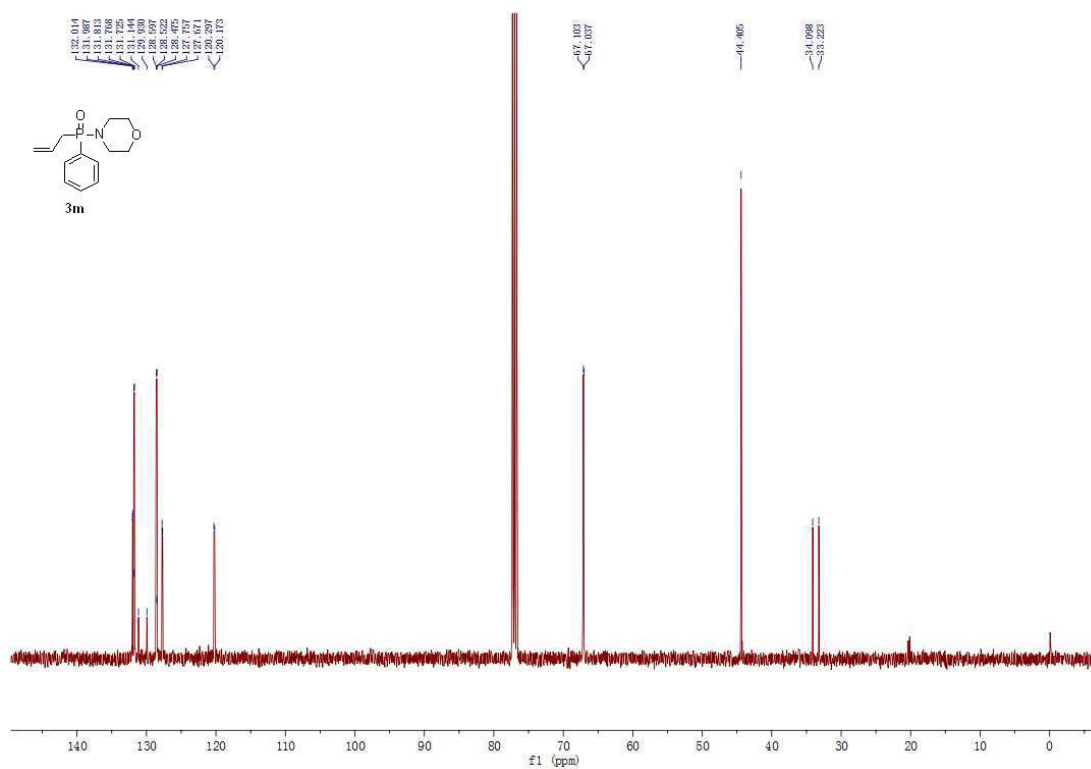

<sup>31</sup>P NMR of **3m**

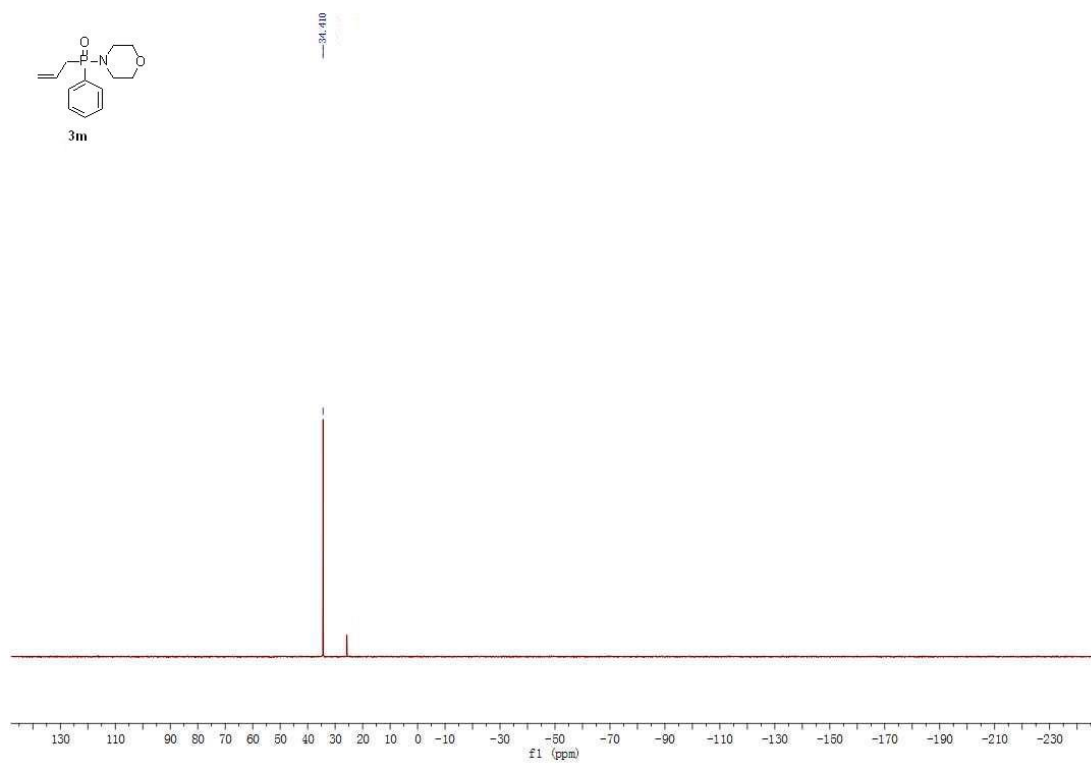

# <sup>1</sup>H NMR of 3n

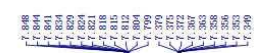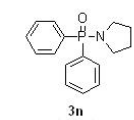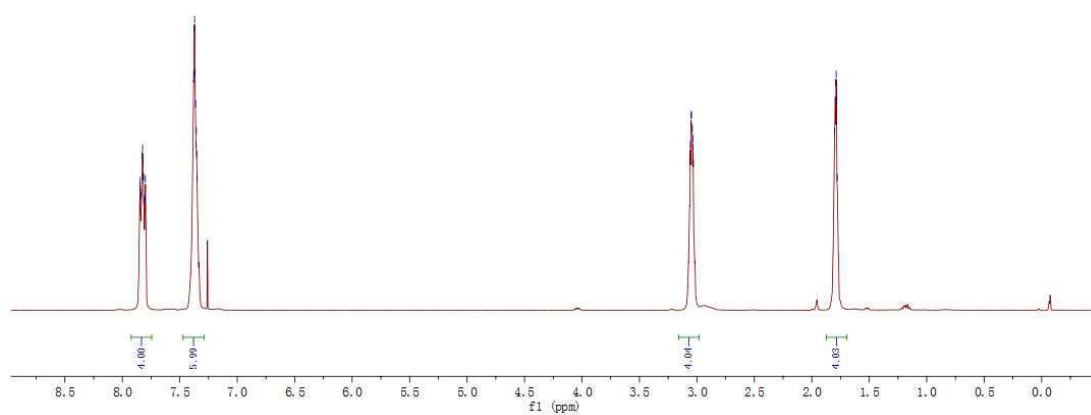

# <sup>13</sup>C NMR of 3n

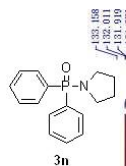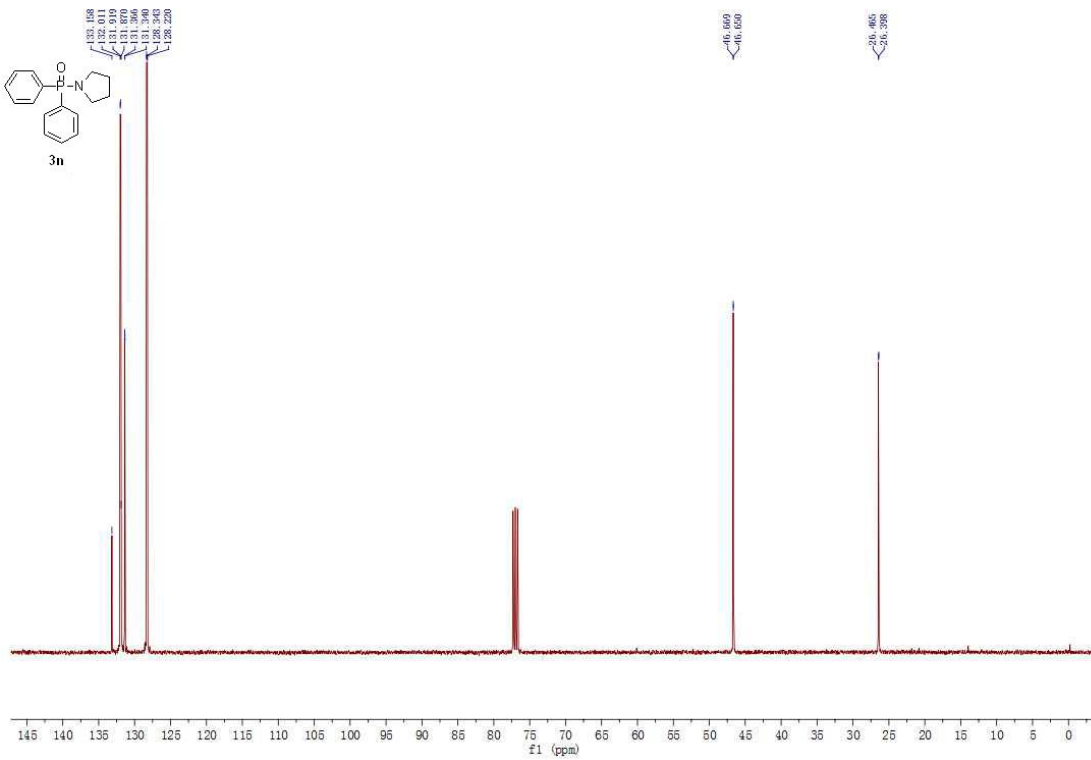

$^{31}\text{P}$  NMR of **3n**

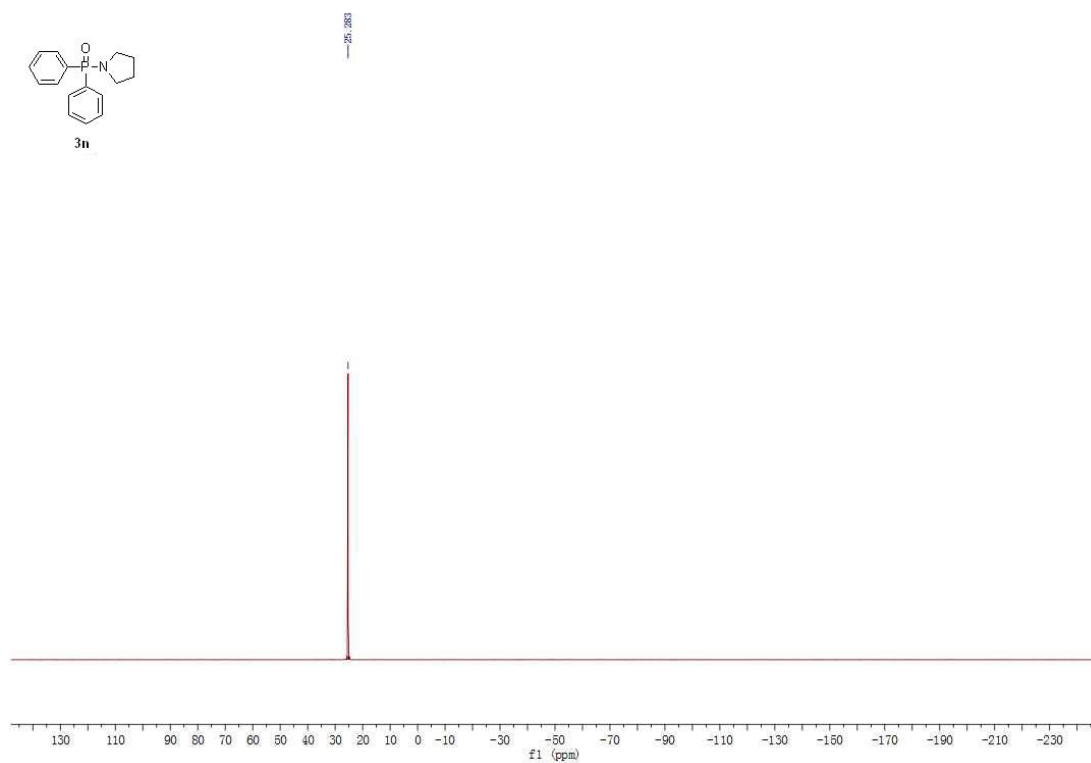

$^1\text{H}$  NMR of **3o**

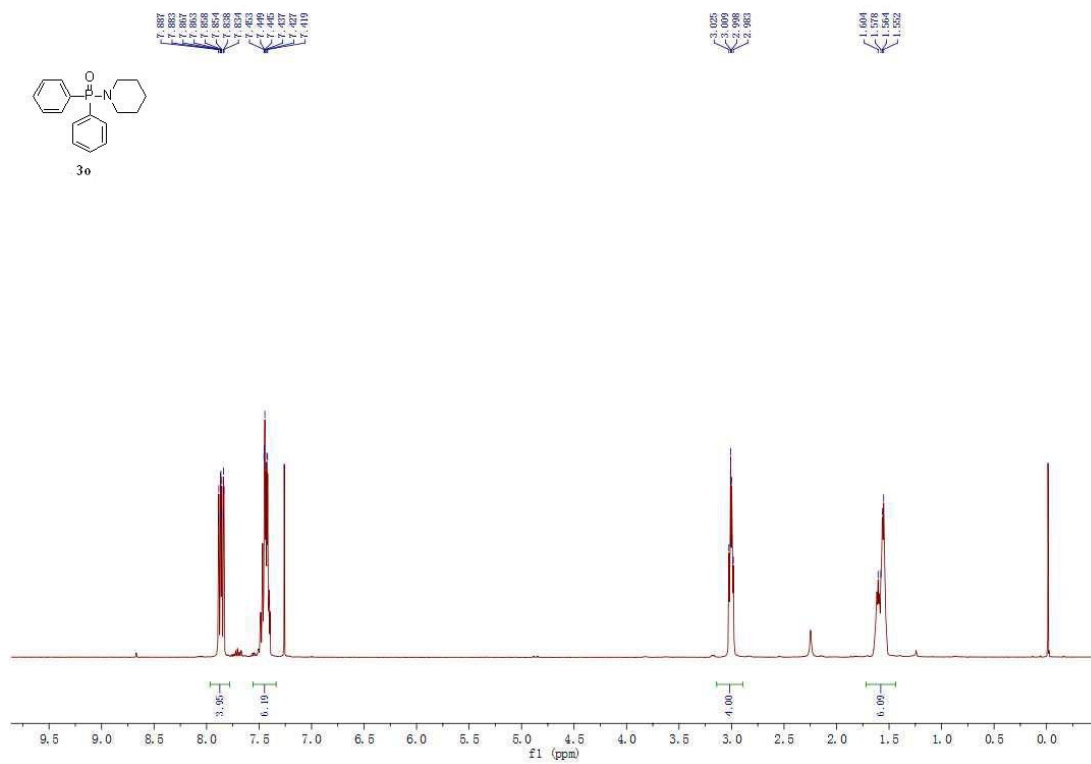



# <sup>13</sup>C NMR of **3o**

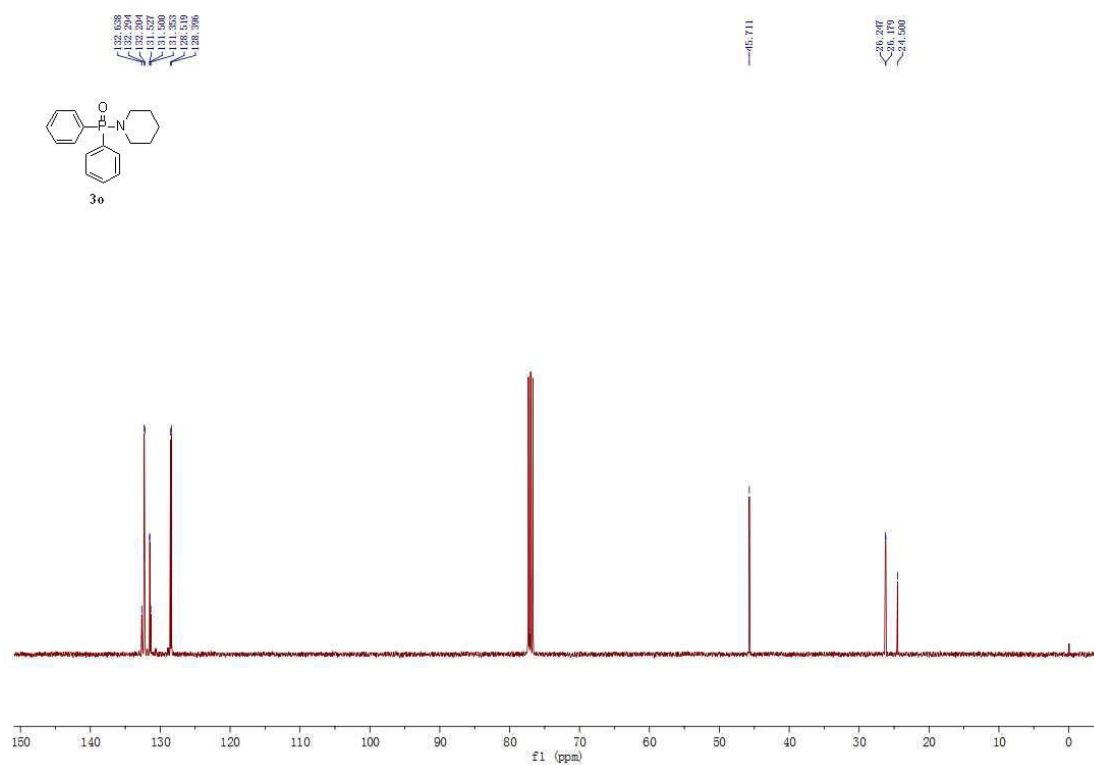

# <sup>31</sup>P NMR of **3o**

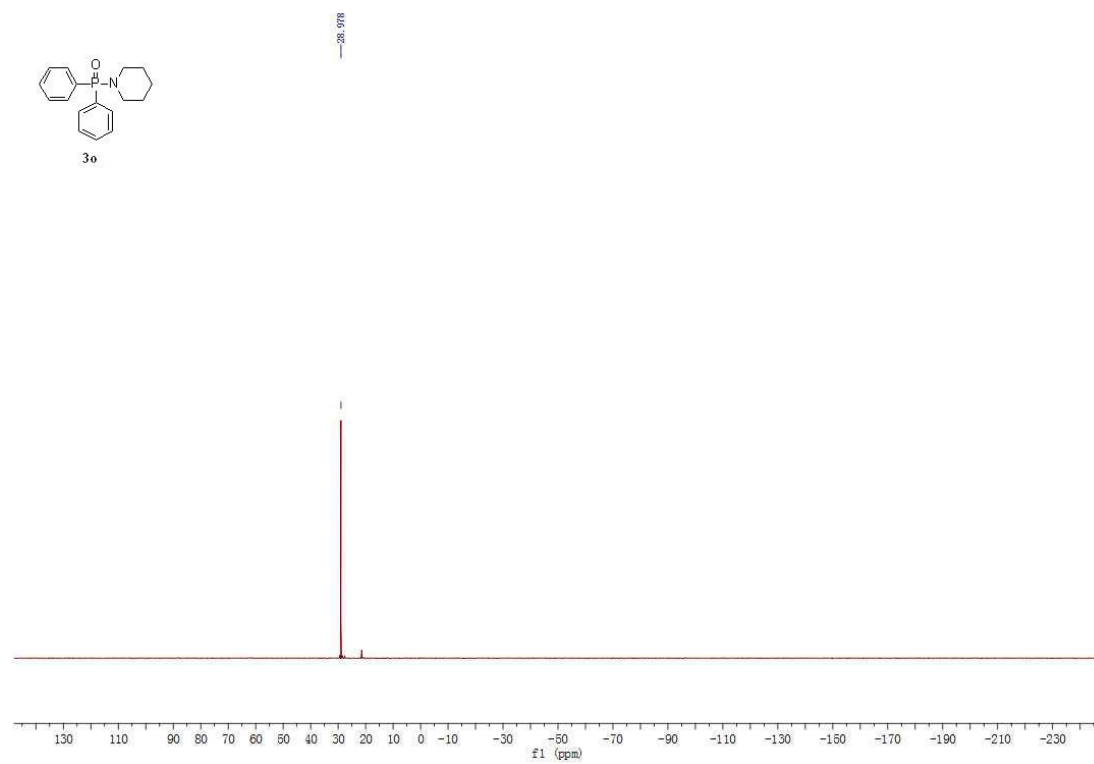

### $^1\text{H}$ NMR of **3p**

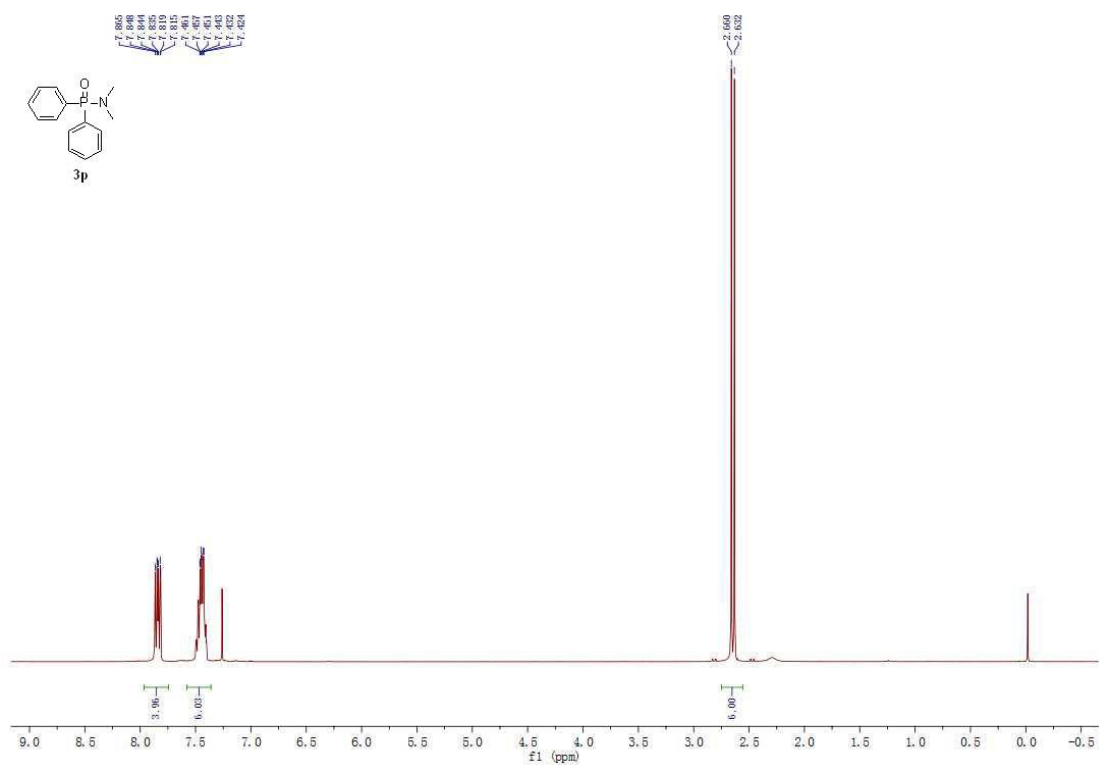

### $^{13}\text{C}$ NMR of **3p**

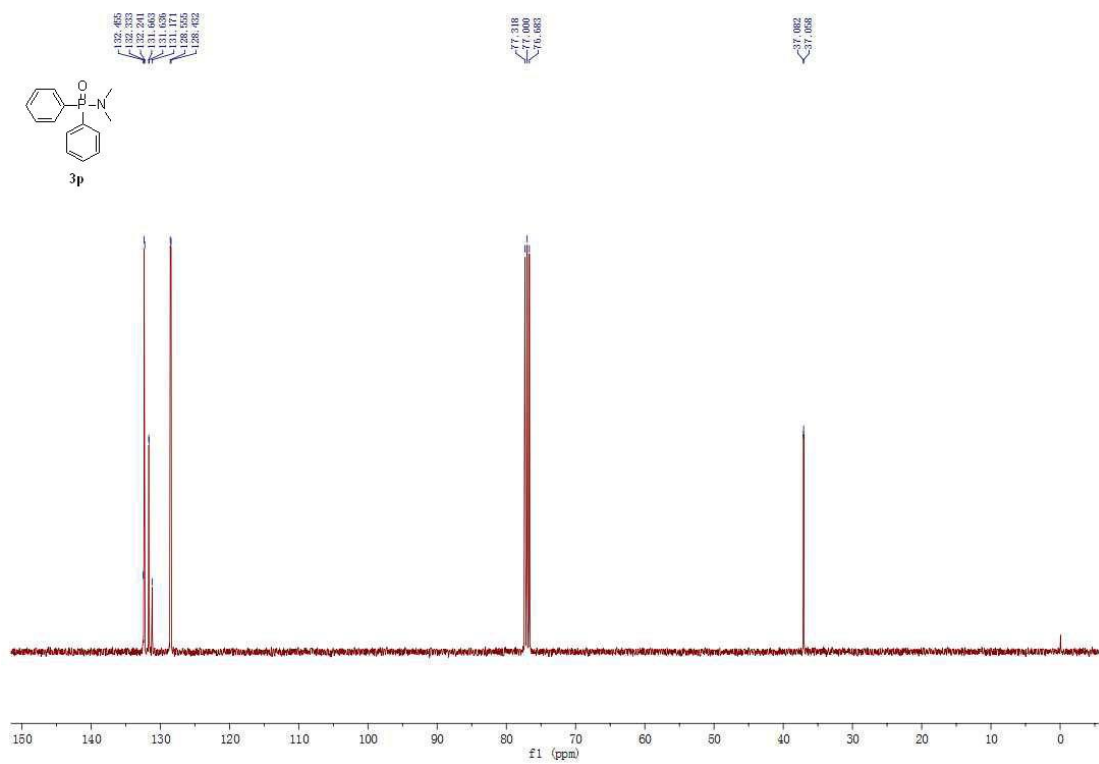

<sup>31</sup>P NMR of **3p**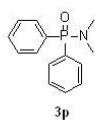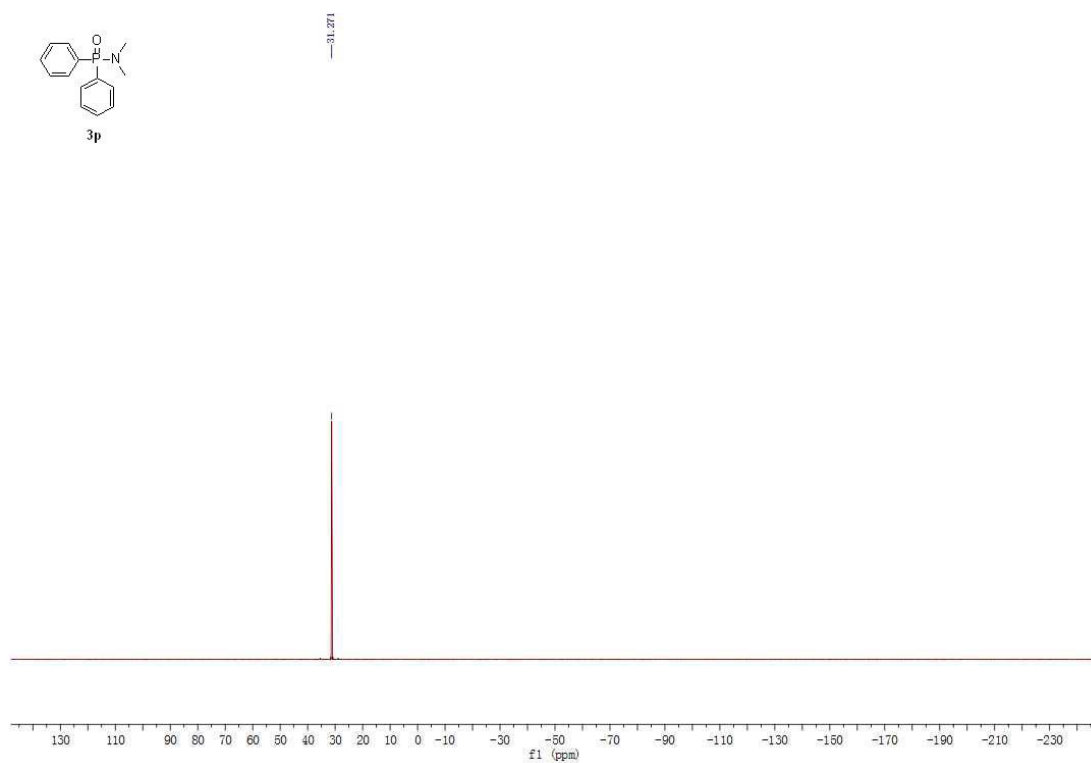<sup>1</sup>H NMR of **3q**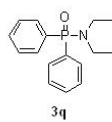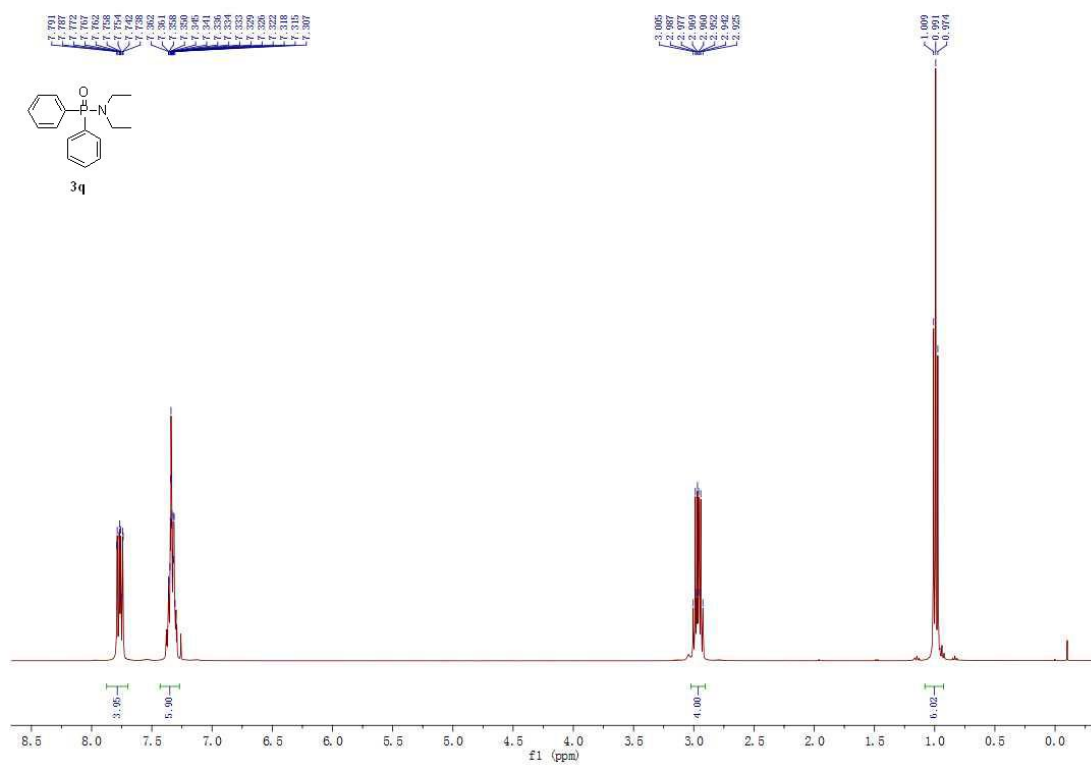

$^{13}\text{C}$  NMR of **3q**

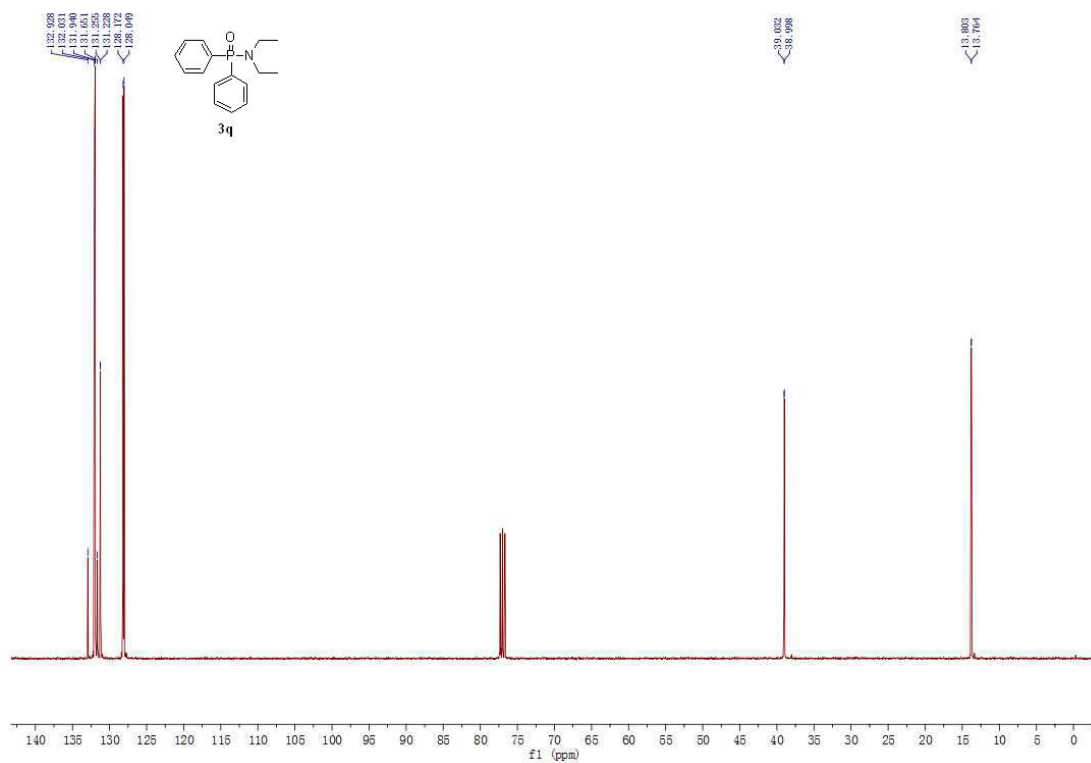

$^{31}\text{P}$  NMR of **3q**

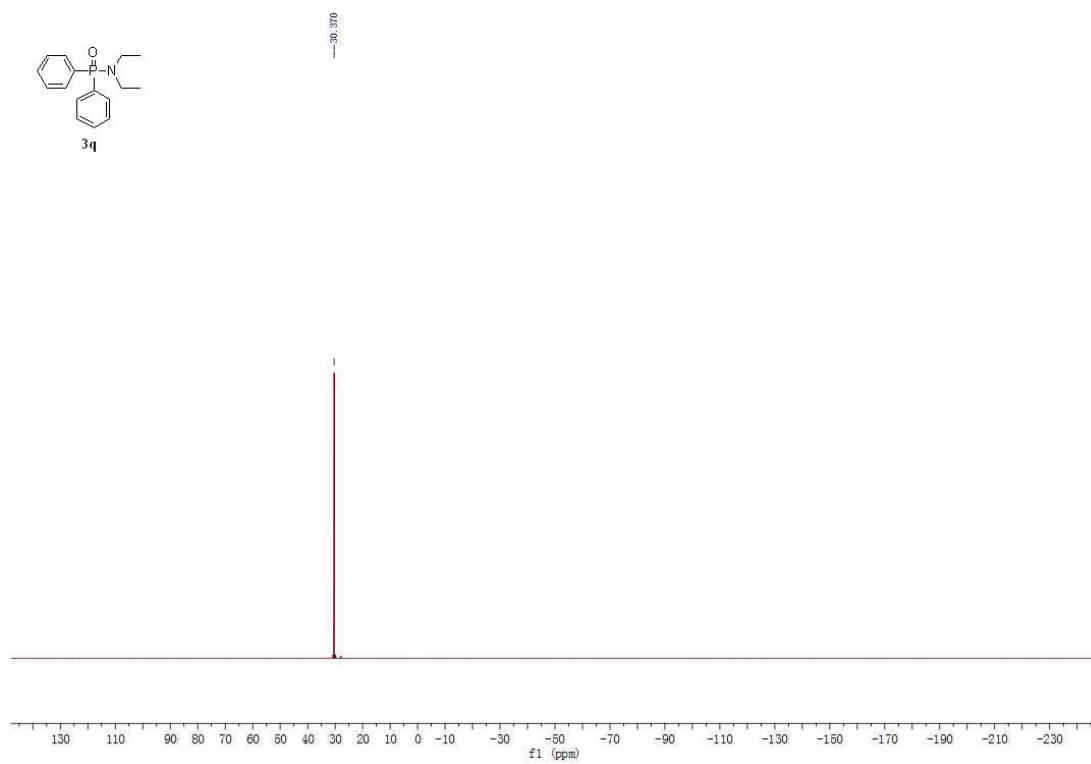

# <sup>1</sup>H NMR of 3s

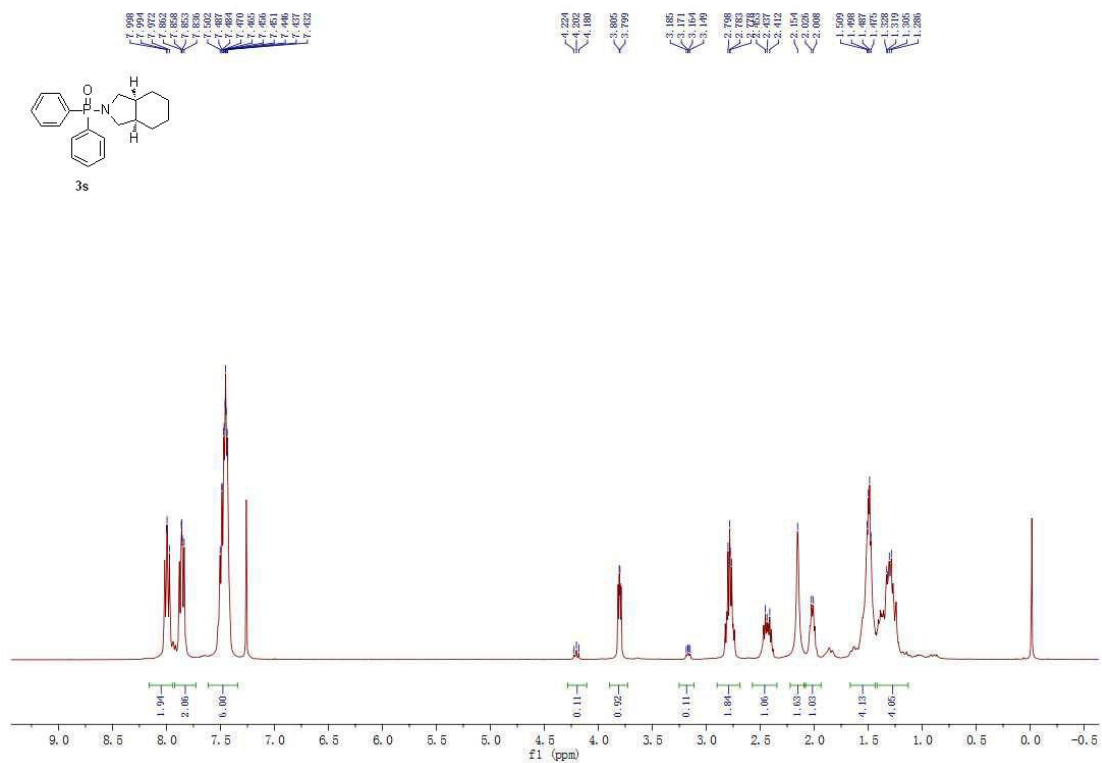

# <sup>13</sup>C NMR of 3s

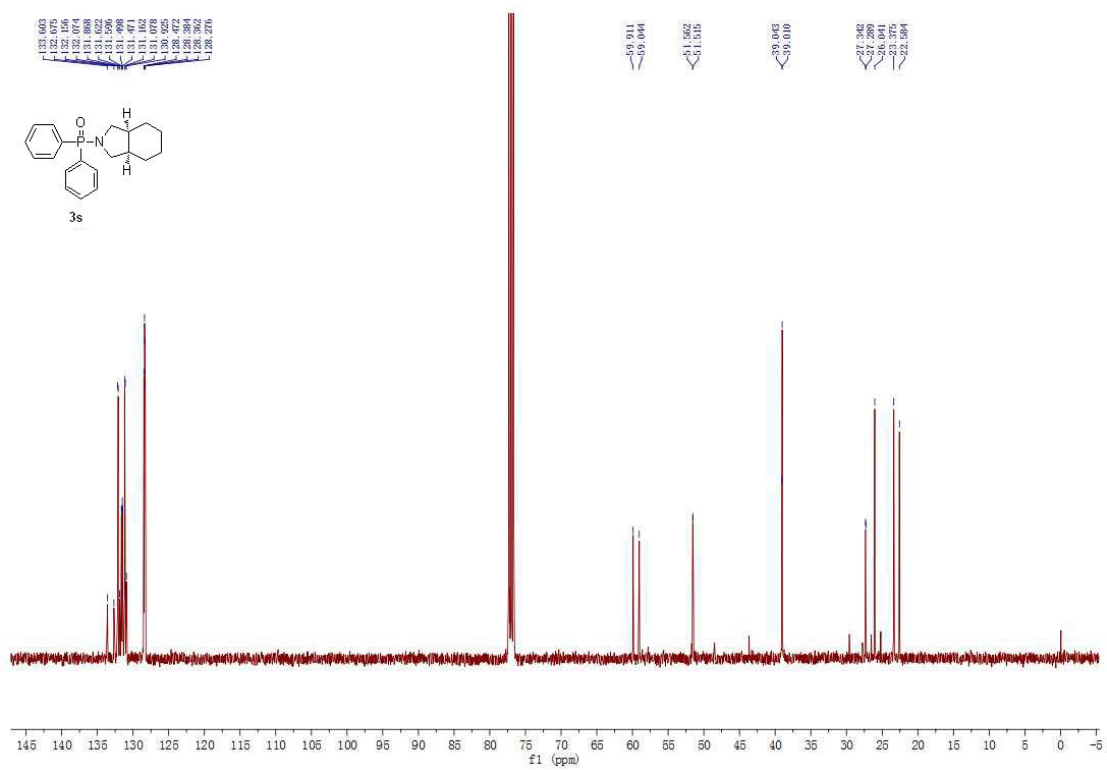

$^{31}\text{P}$  NMR of **3s**

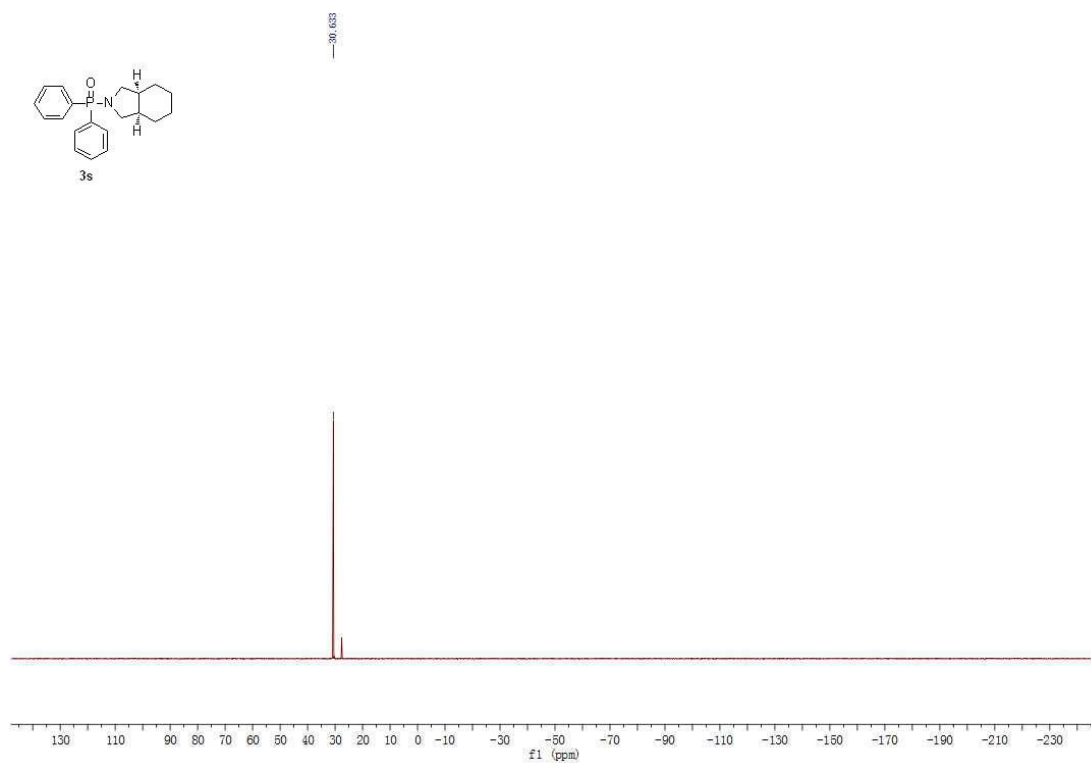

$^1\text{H}$  NMR of **3t**

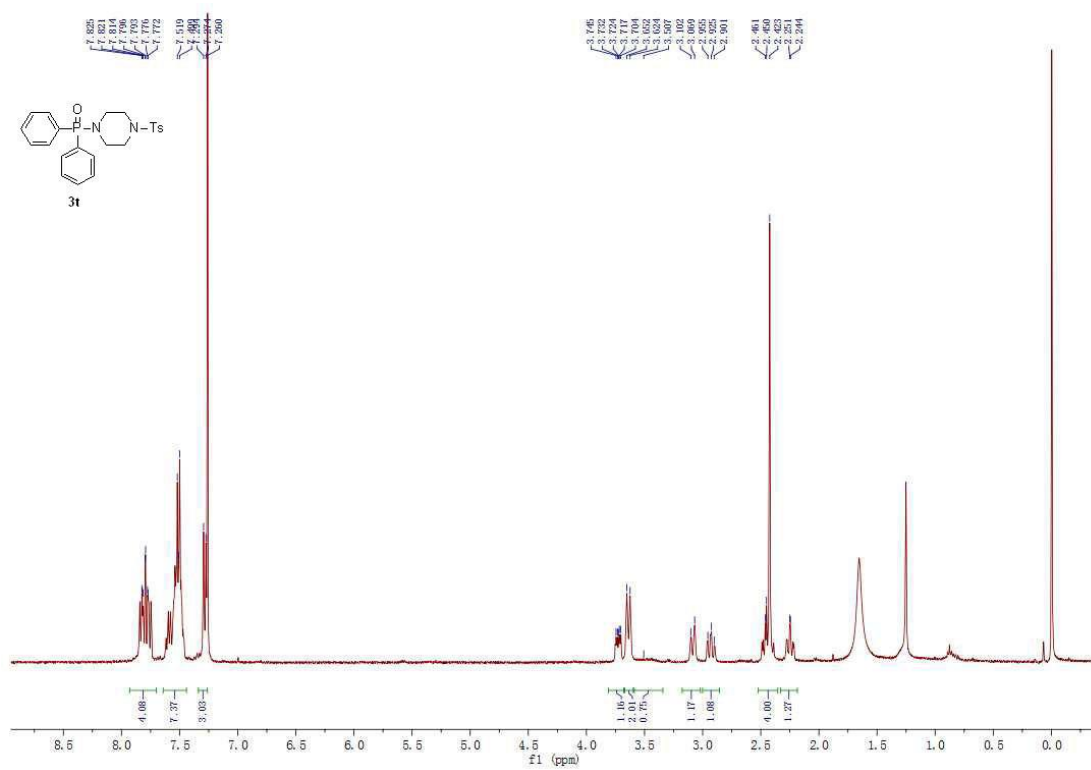

<sup>13</sup>C NMR of **3t**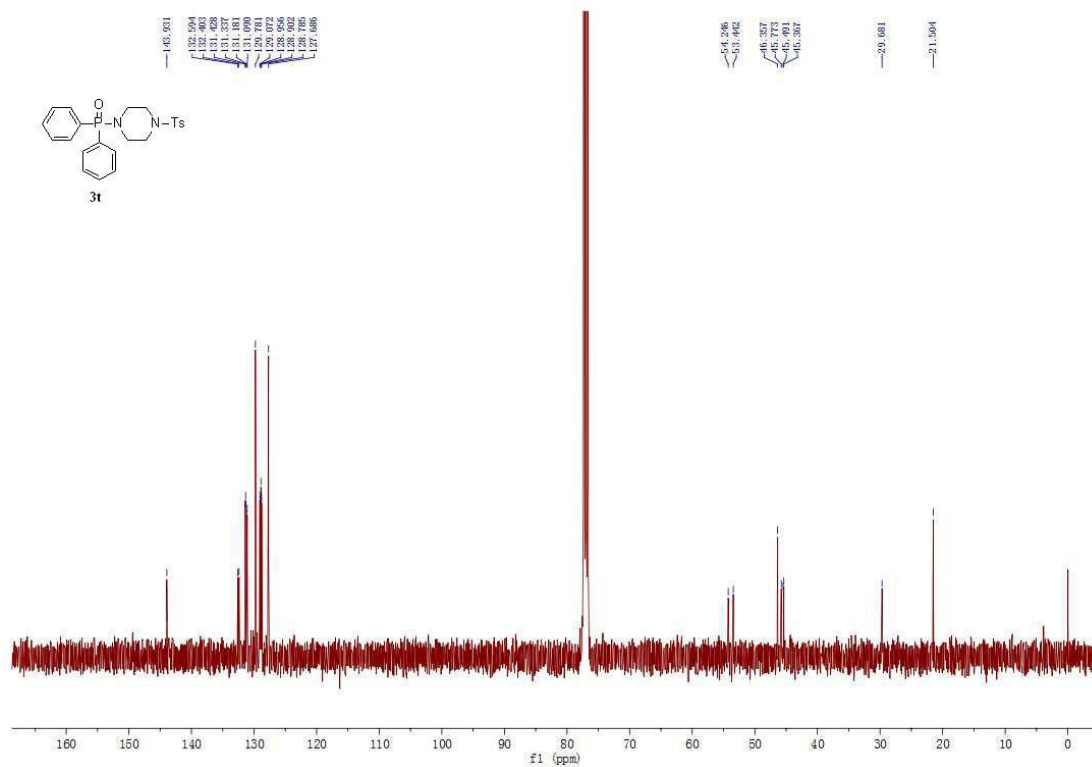<sup>31</sup>P NMR of **3t**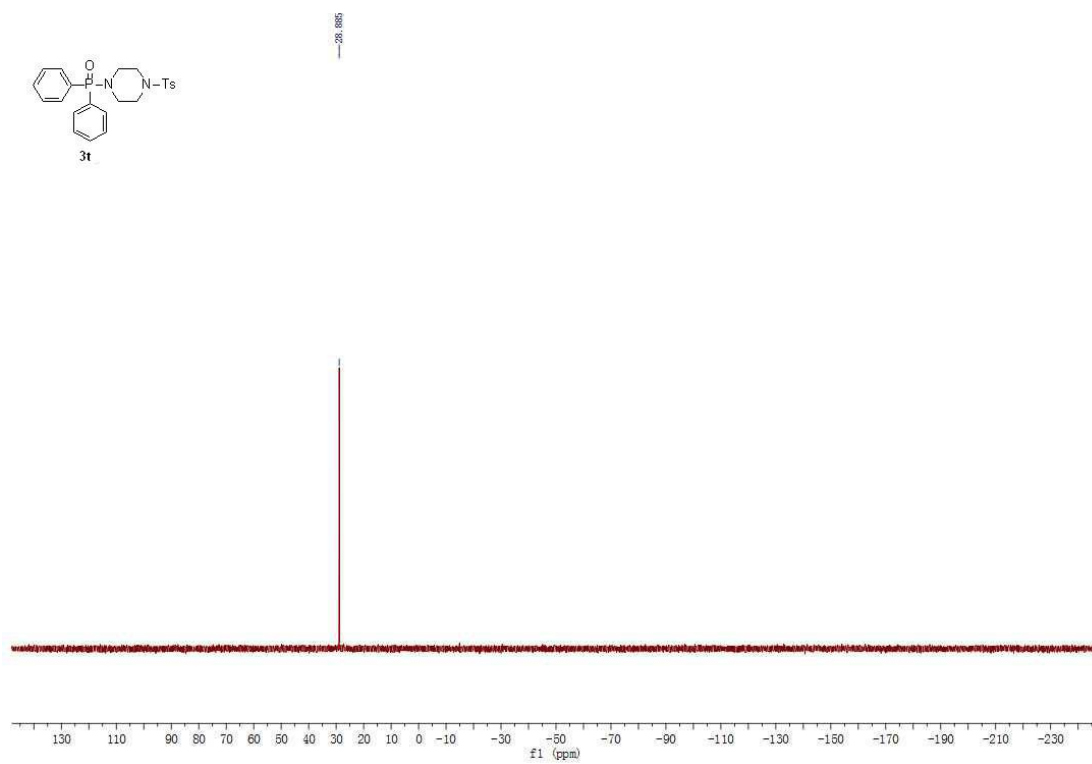

# <sup>1</sup>H NMR of **3u**

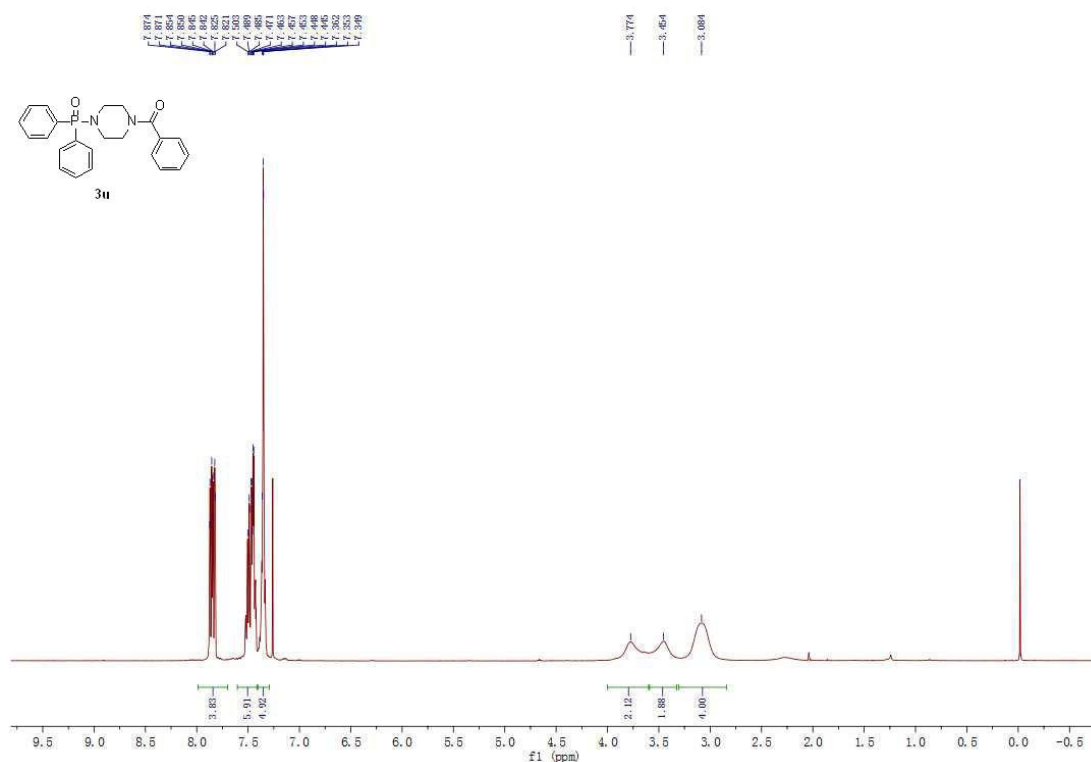

# <sup>13</sup>C NMR of **3u**

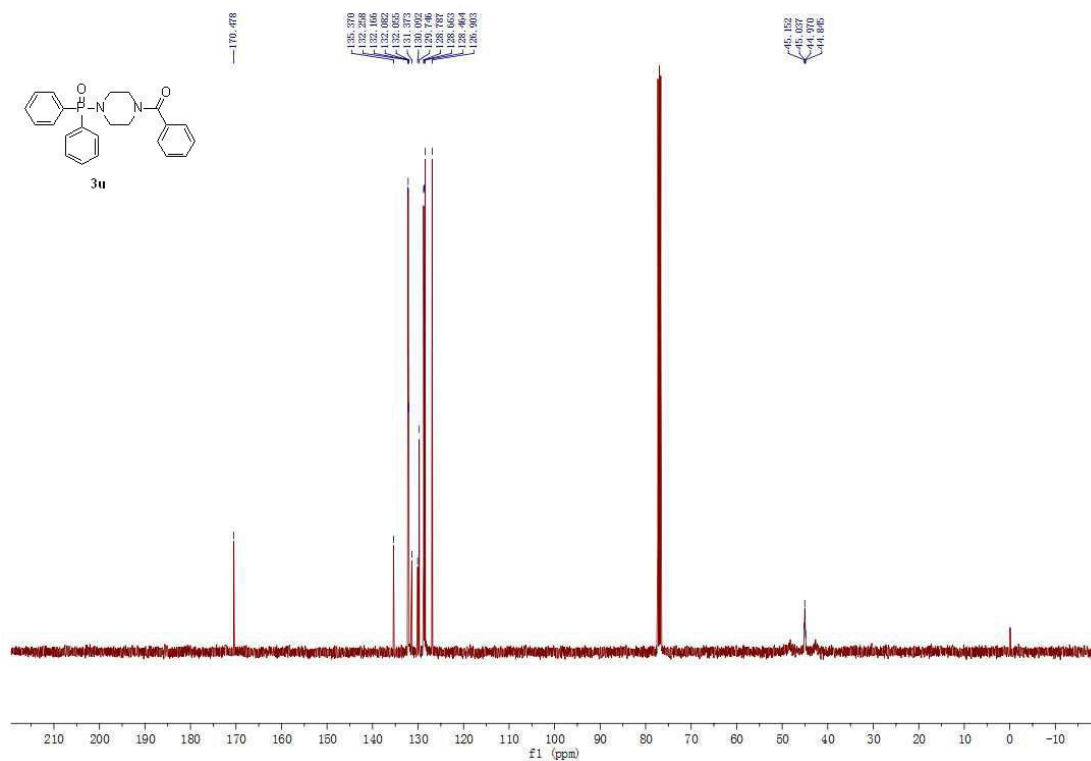



$^{31}\text{P}$  NMR of **3u**

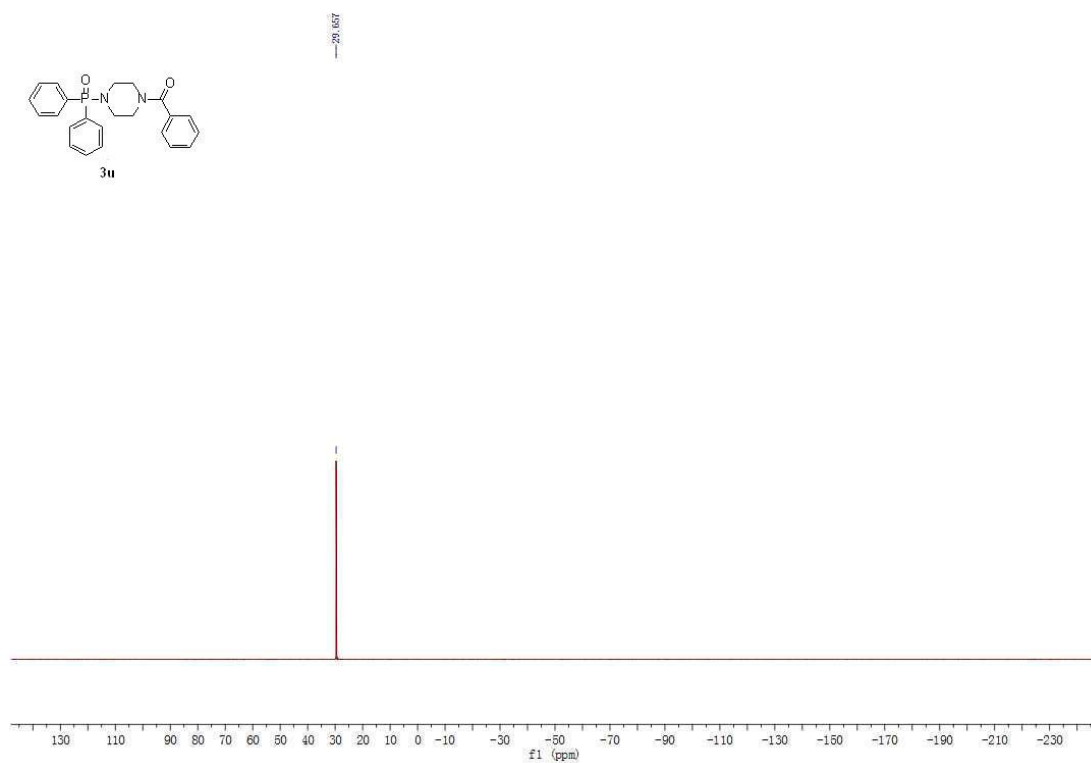

$^1\text{H}$  NMR of **3v**

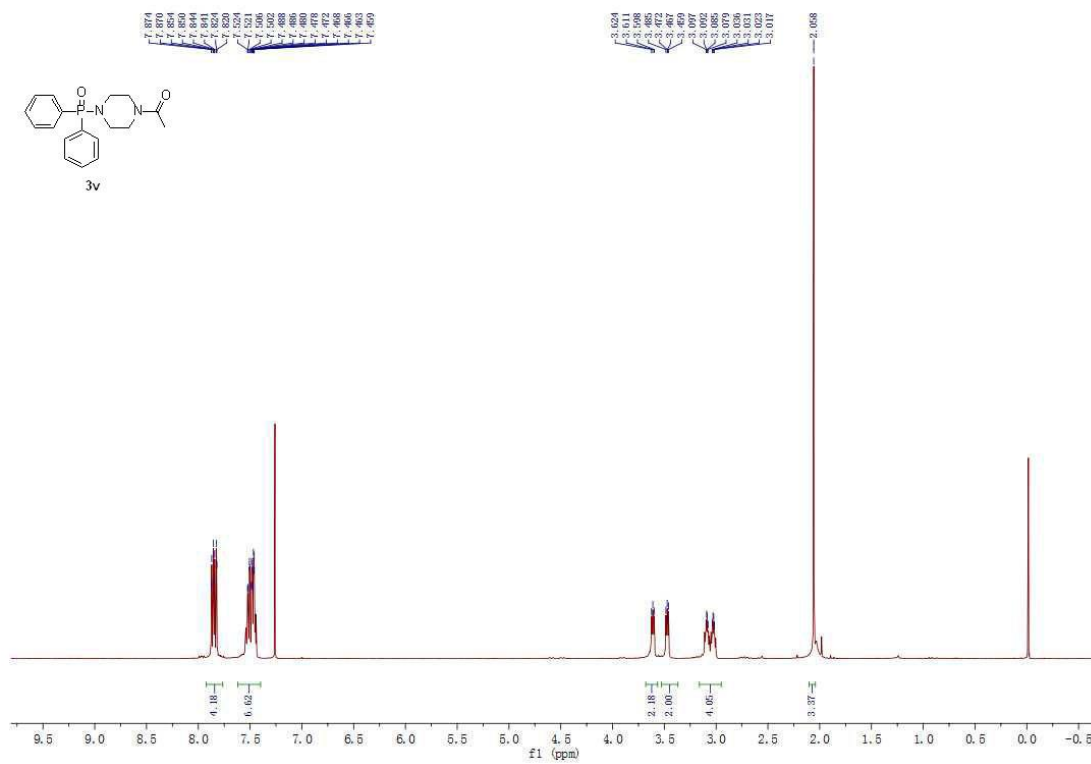

$^{13}\text{C}$  NMR of **3v**

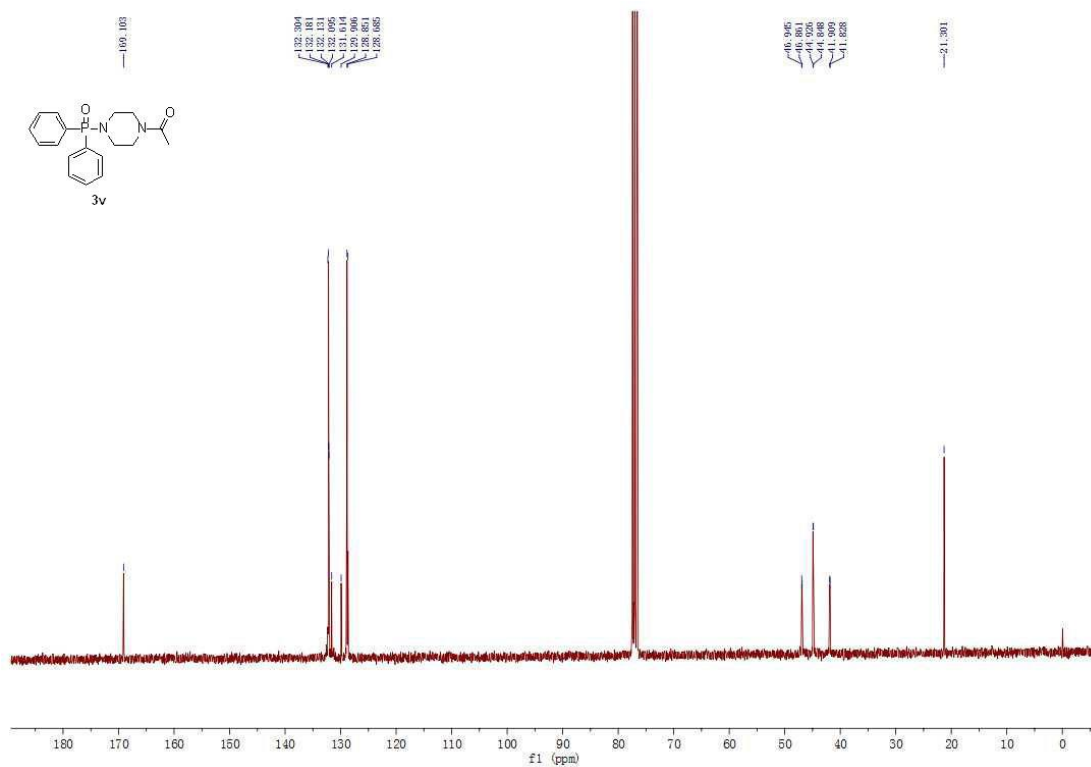

$^{31}\text{P}$  NMR of **3v**

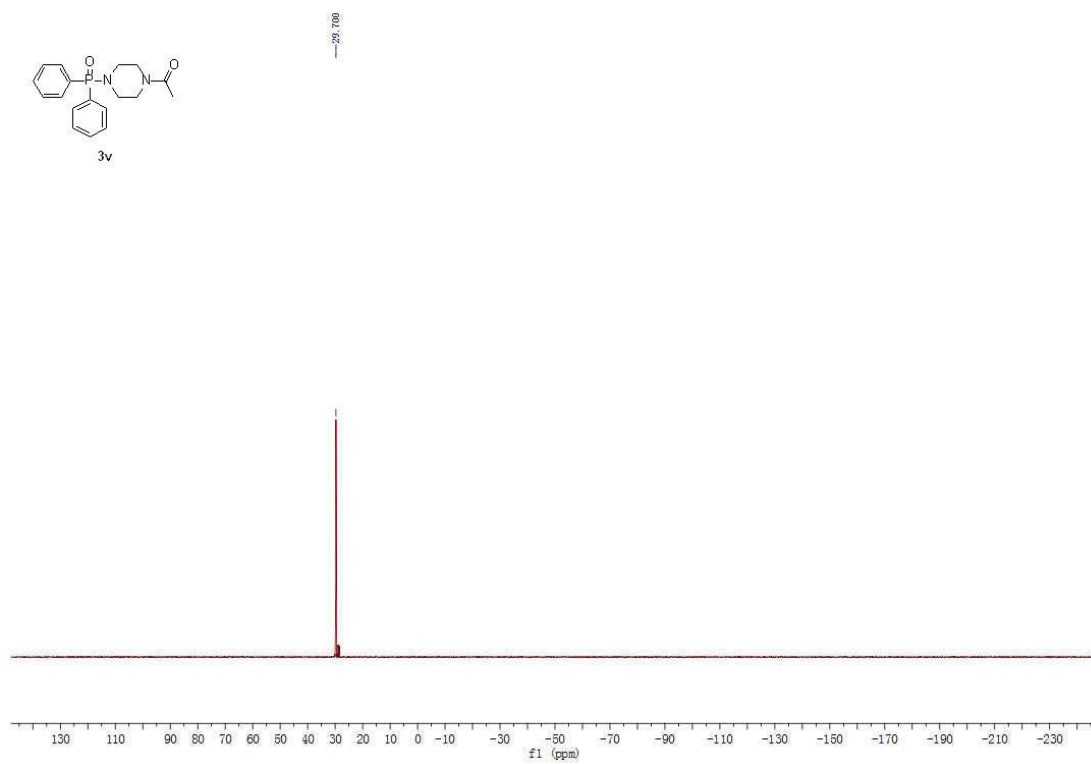

# <sup>1</sup>H NMR of **3w**

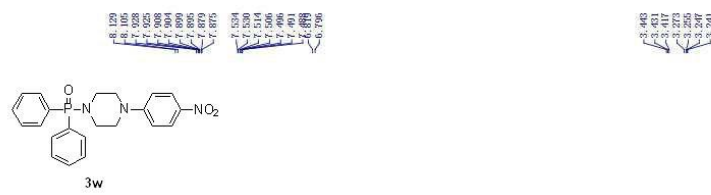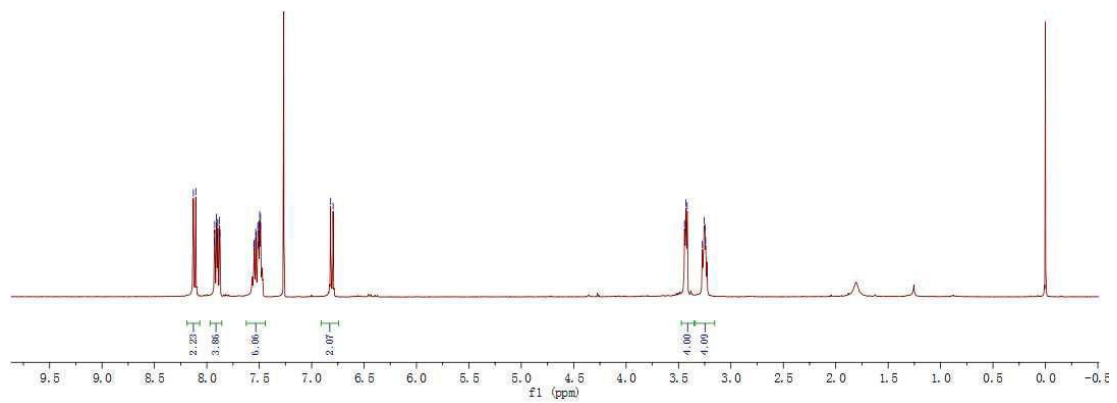

# <sup>13</sup>C NMR of **3w**

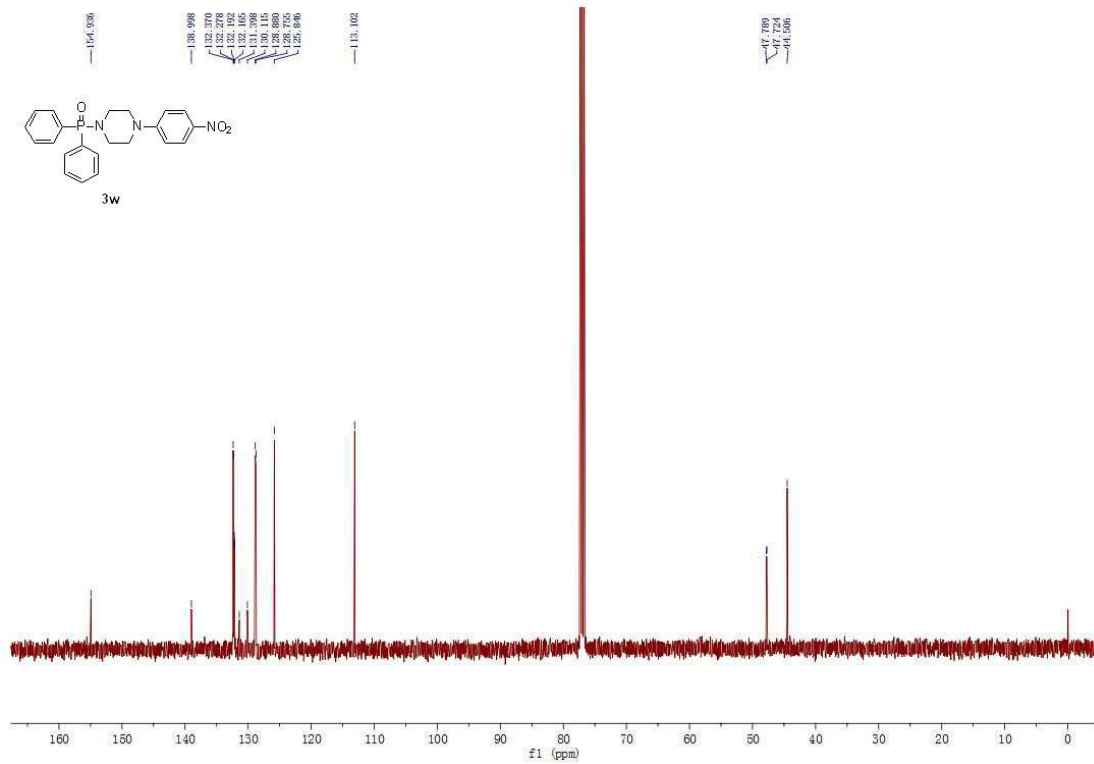

$^{31}\text{P}$  NMR of **3w**

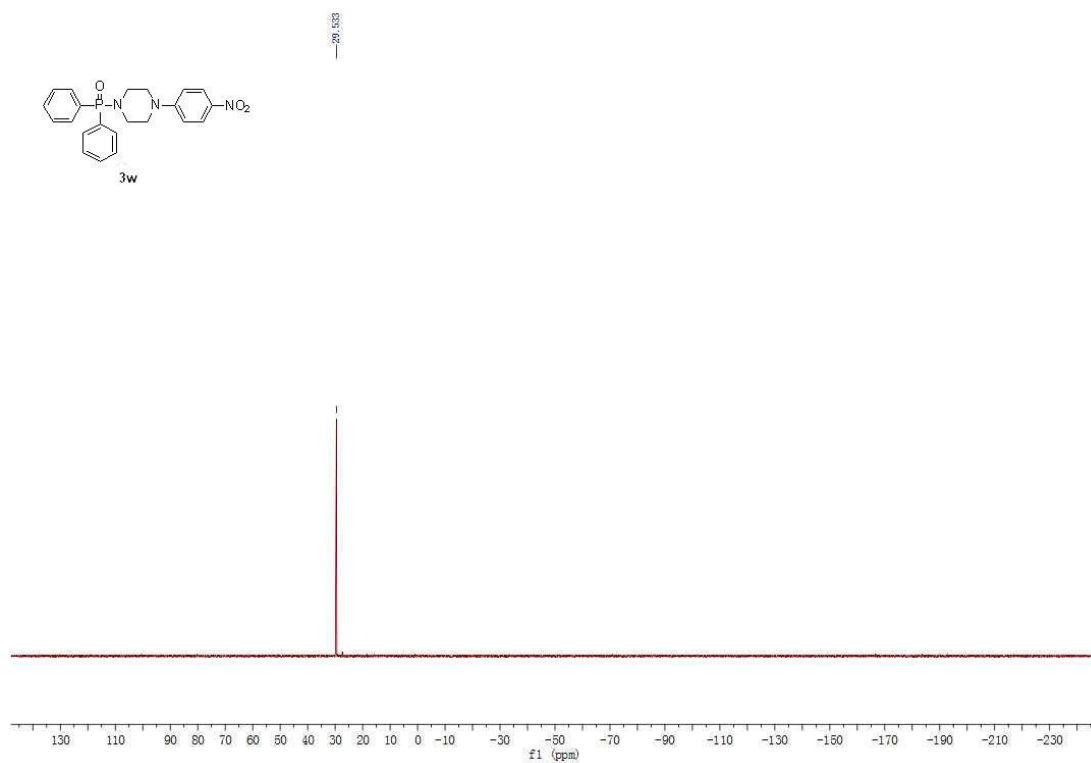

$^1\text{H}$  NMR of **3x**

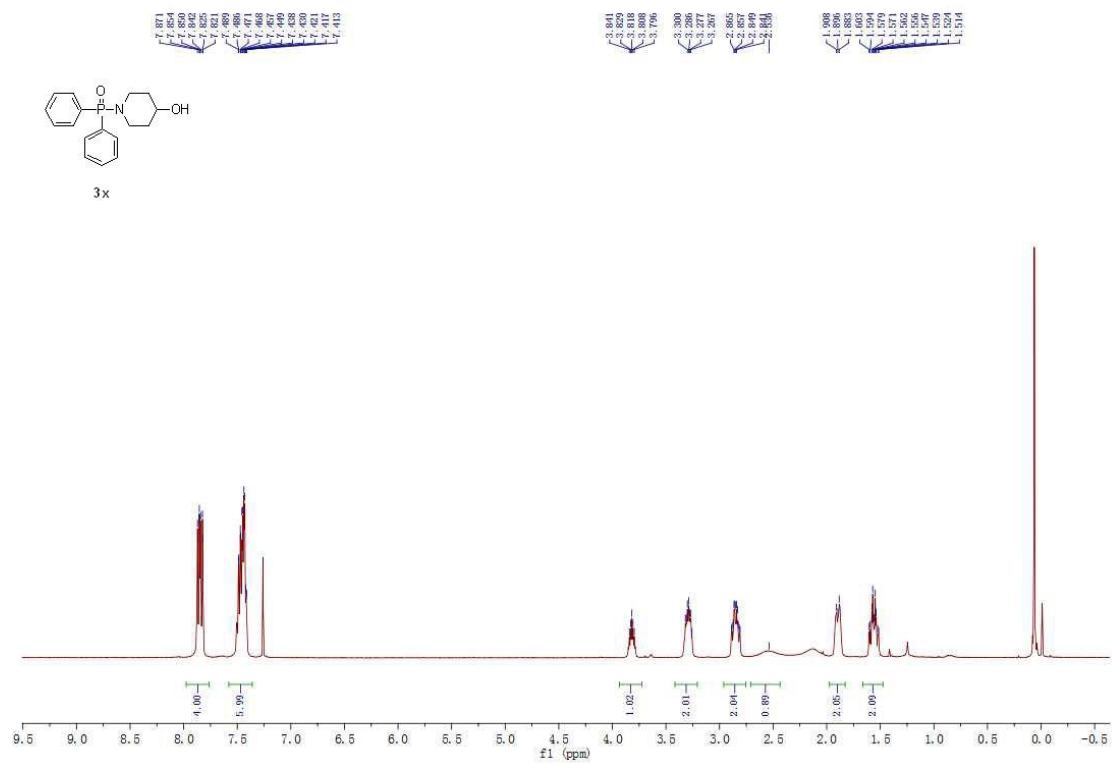

# $^{13}\text{C}$ NMR of **3x**

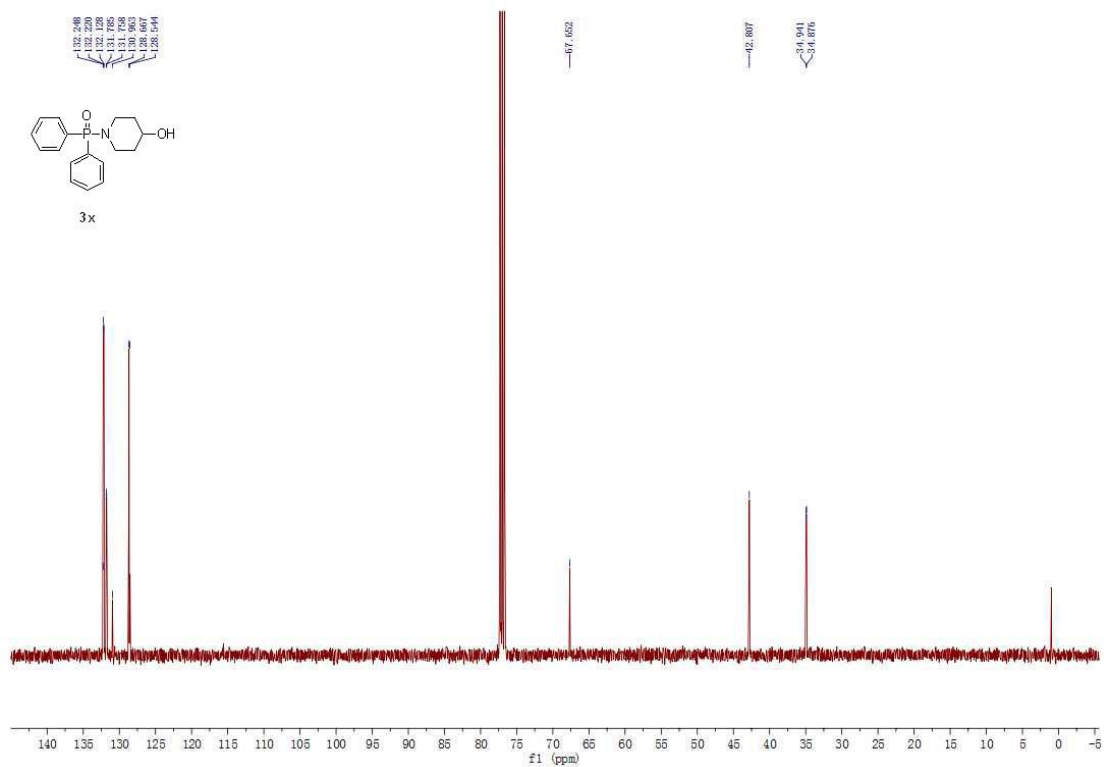

# $^{31}\text{P}$ NMR of **3x**

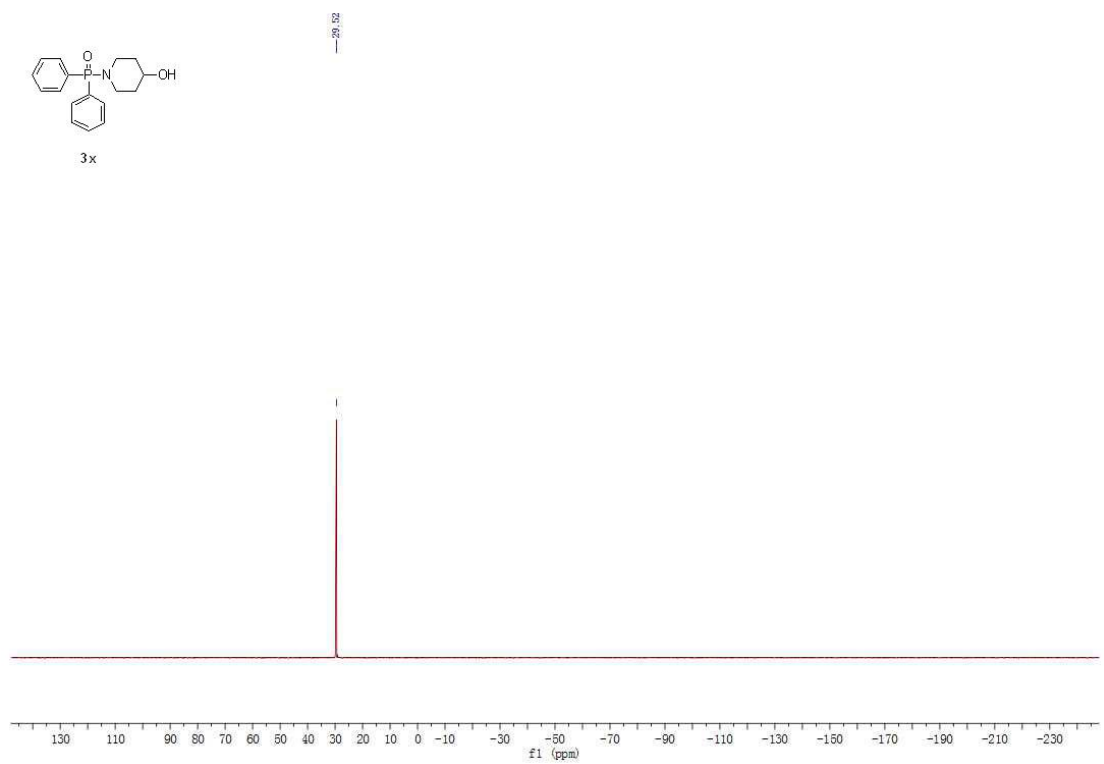

# <sup>1</sup>H NMR of **3y**

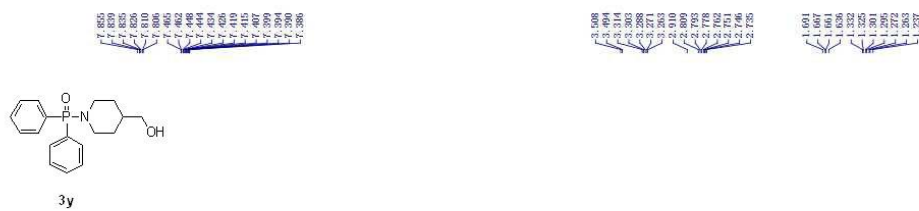

# <sup>13</sup>C NMR of **3y**

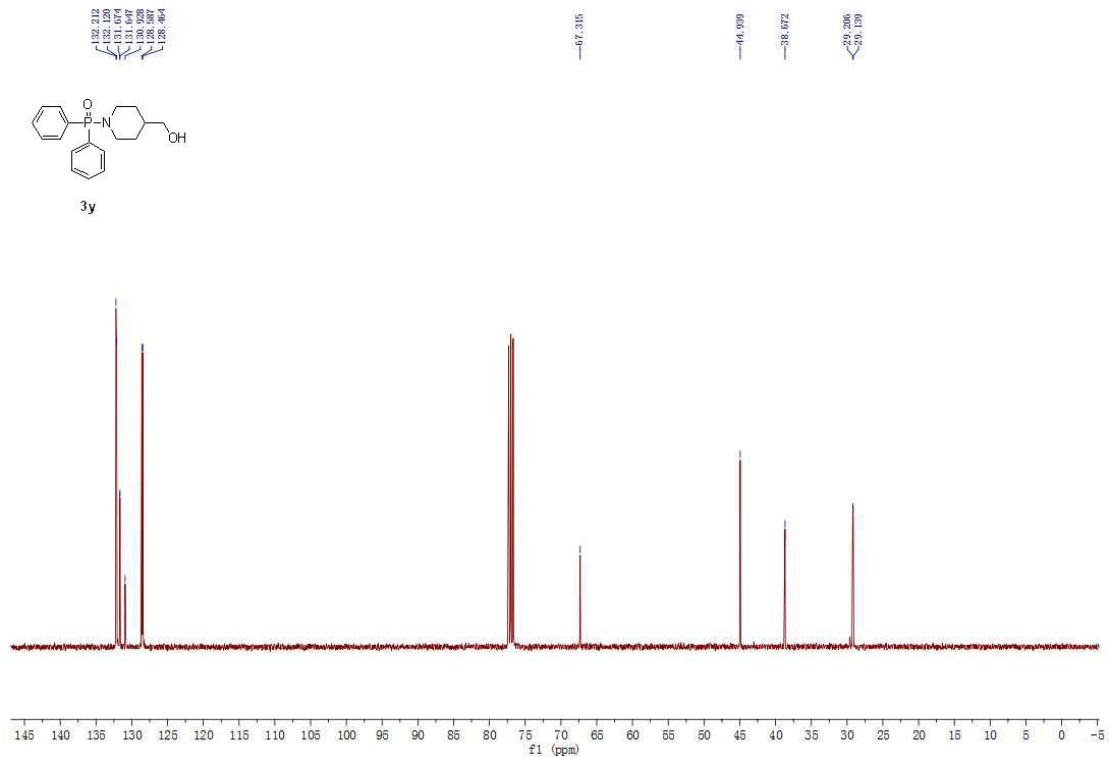

# <sup>31</sup>P NMR of **3y**

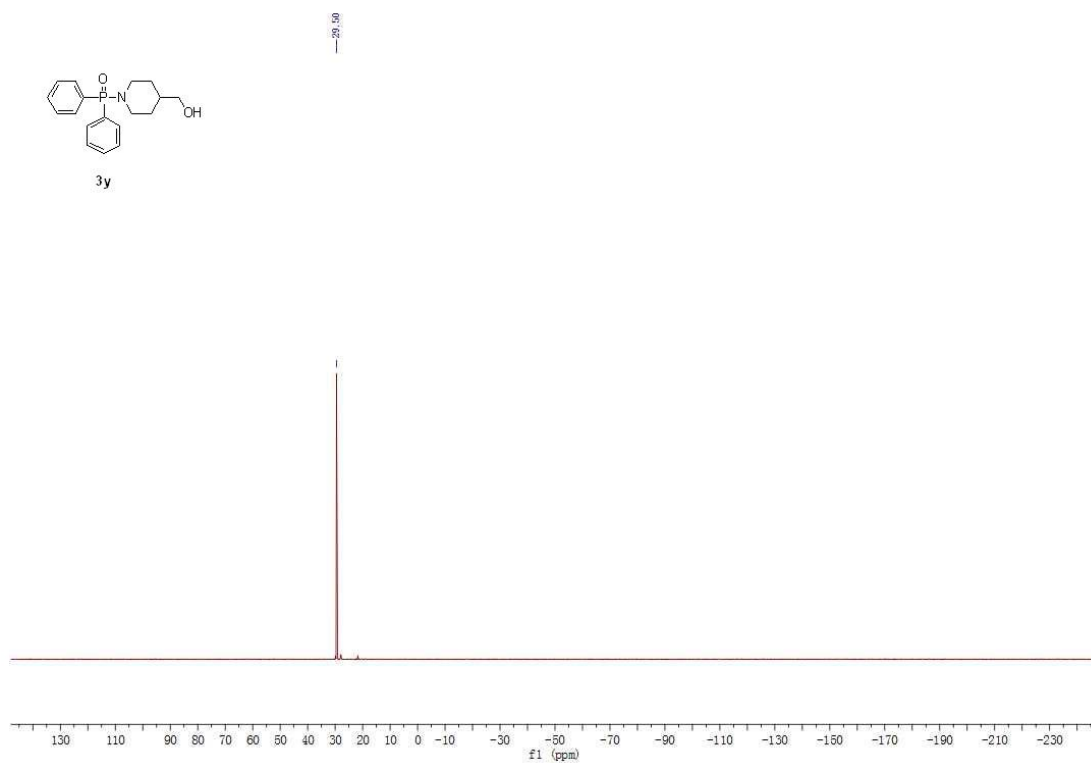

# <sup>1</sup>H NMR of **3z**

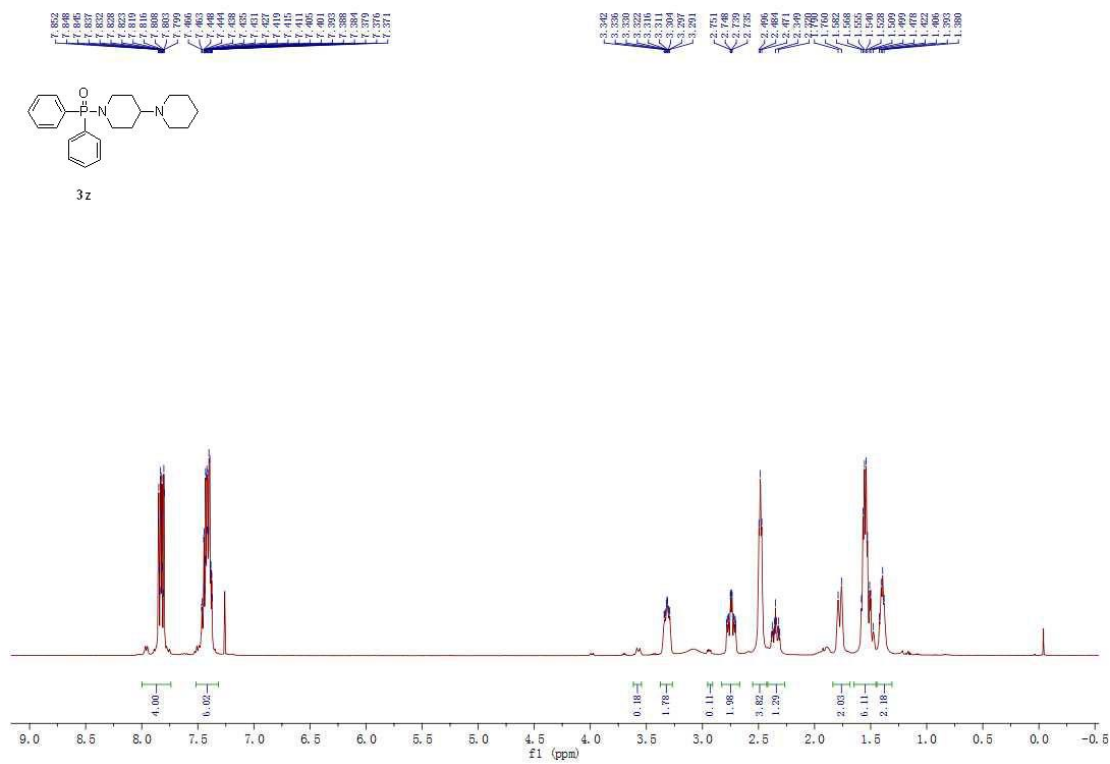

# <sup>13</sup>C NMR of **3z**

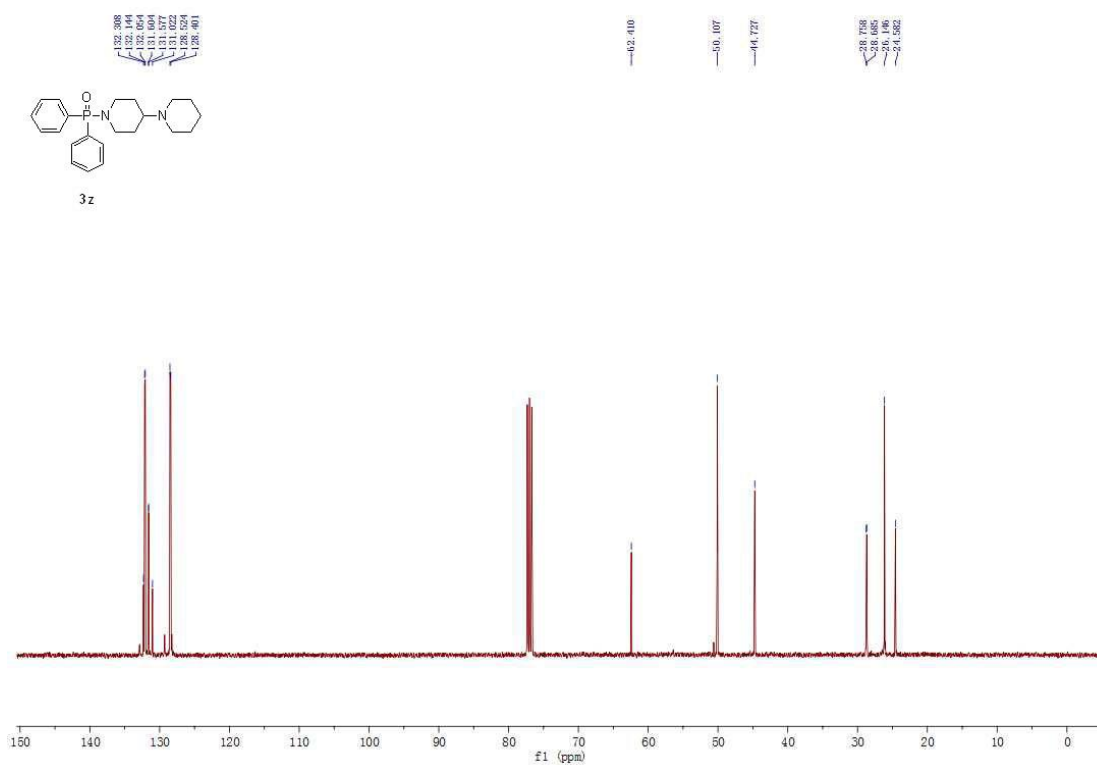

# <sup>31</sup>P NMR of **3z**

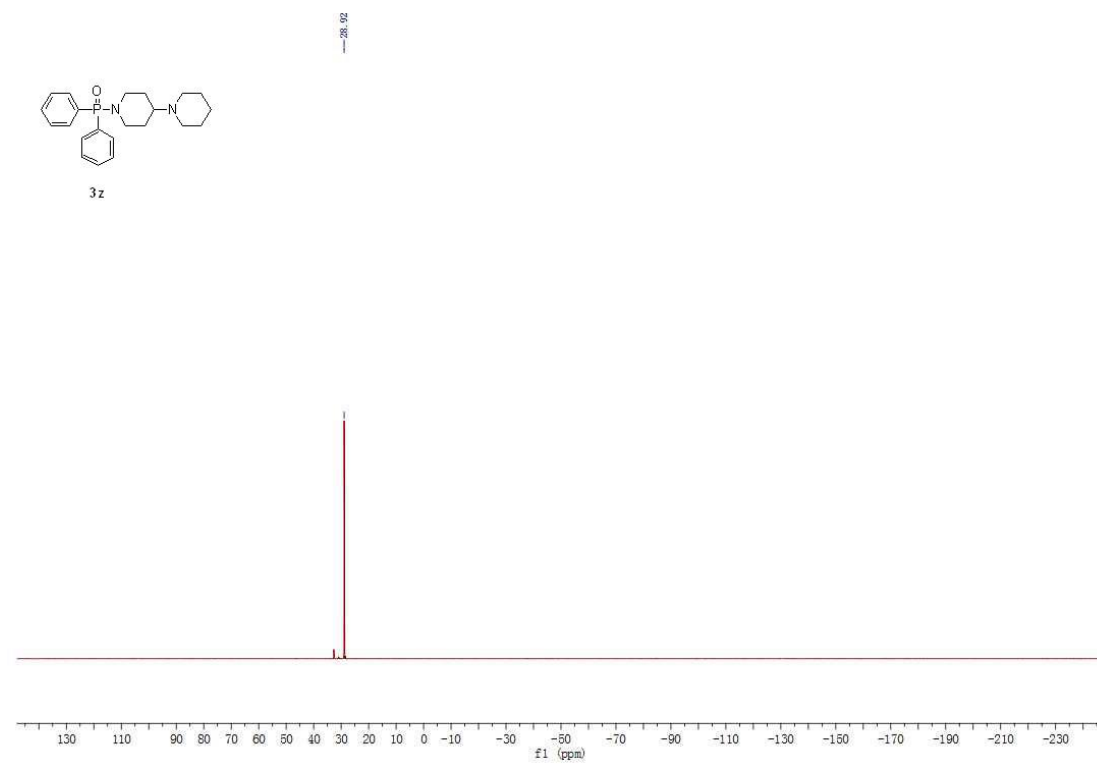



**3A**

CC1CCN(C1)C(=O)C2=CC=CC=C2C3=CC=CC=C3

<sup>1</sup>H NMR spectrum (CDCl<sub>3</sub>) of compound **3A**. The spectrum displays aromatic signals between 7.0 and 8.0 ppm, a methylene signal at 3.4 ppm, and a methine signal at 1.8 ppm. Integration values are provided below the baseline.

**Chemical structure of 3A:** CN1CCc2ccccc2P(=O)(c3ccccc3)c4ccccc14

**<sup>13</sup>C NMR peaks (ppm):**

- 132.228, 131.873, 131.841, 131.827, 131.825, 131.822, 131.818, 131.691, 131.662, 131.577, 131.564, 131.550, 131.310, 131.242, 128.633, 128.619, 128.605, 128.597, 128.412
- 132.228, 131.873, 131.841, 131.827, 131.825, 131.822, 131.818, 131.787, 131.718, 131.662, 131.577, 131.564, 131.310, 131.242, 131.157
- 128.633, 128.619, 128.597, 128.412
- 55.994, 51.527, 50.737, 47.534, 41.964, 41.864
- 34.895, 33.493, 33.478, 31.678, 31.553, 31.506, 25.859, 25.774, 22.496, 18.696

# <sup>31</sup>P NMR of 3A

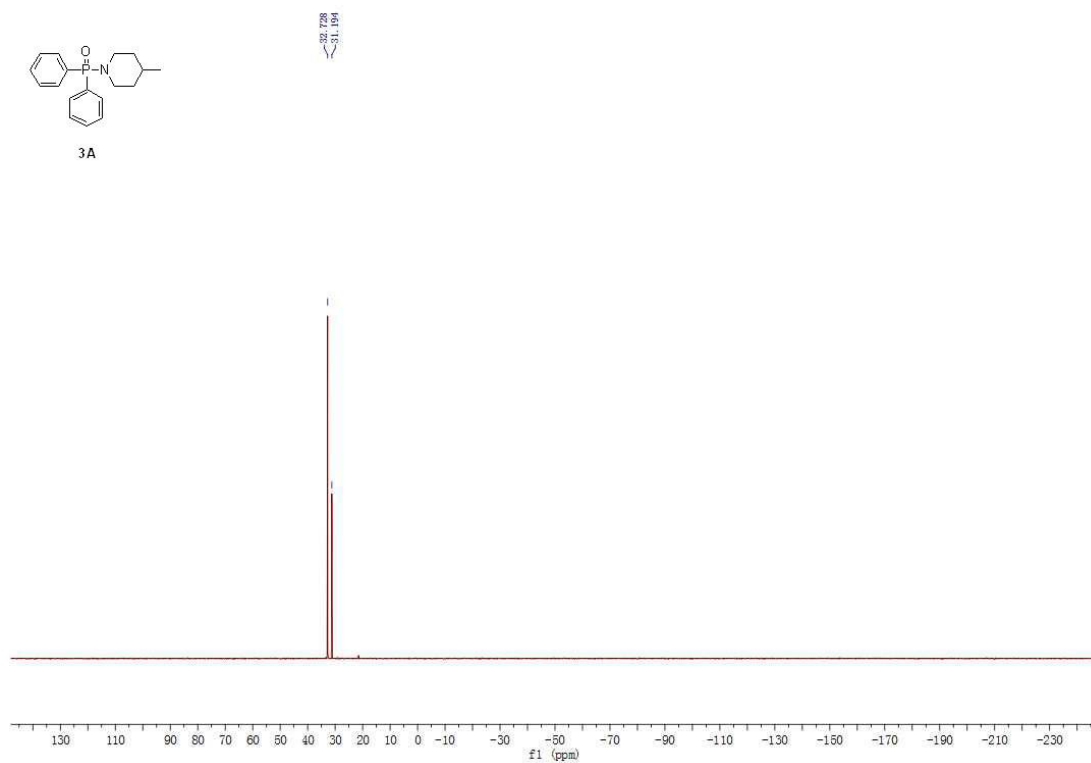

# <sup>1</sup>H NMR of 3A (*d*<sub>6</sub>-DMSO)

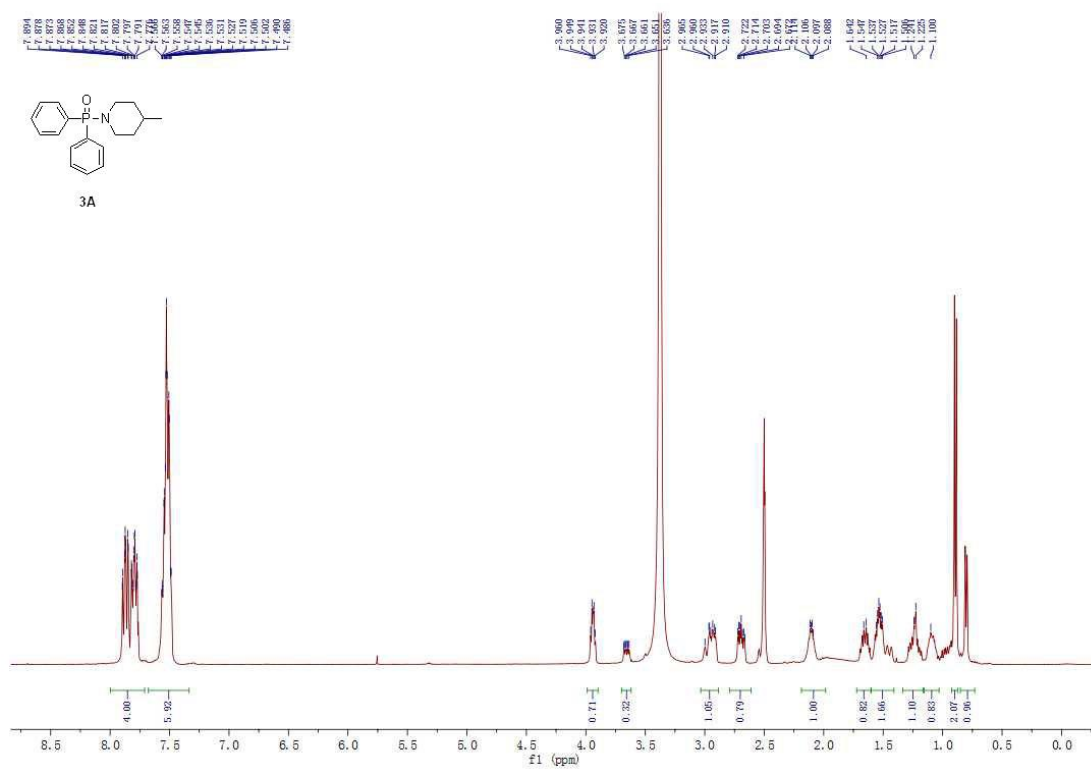

$^1\text{H}$  NMR of **3A** ( $d_6$ -DMSO at  $100^\circ\text{C}$ )

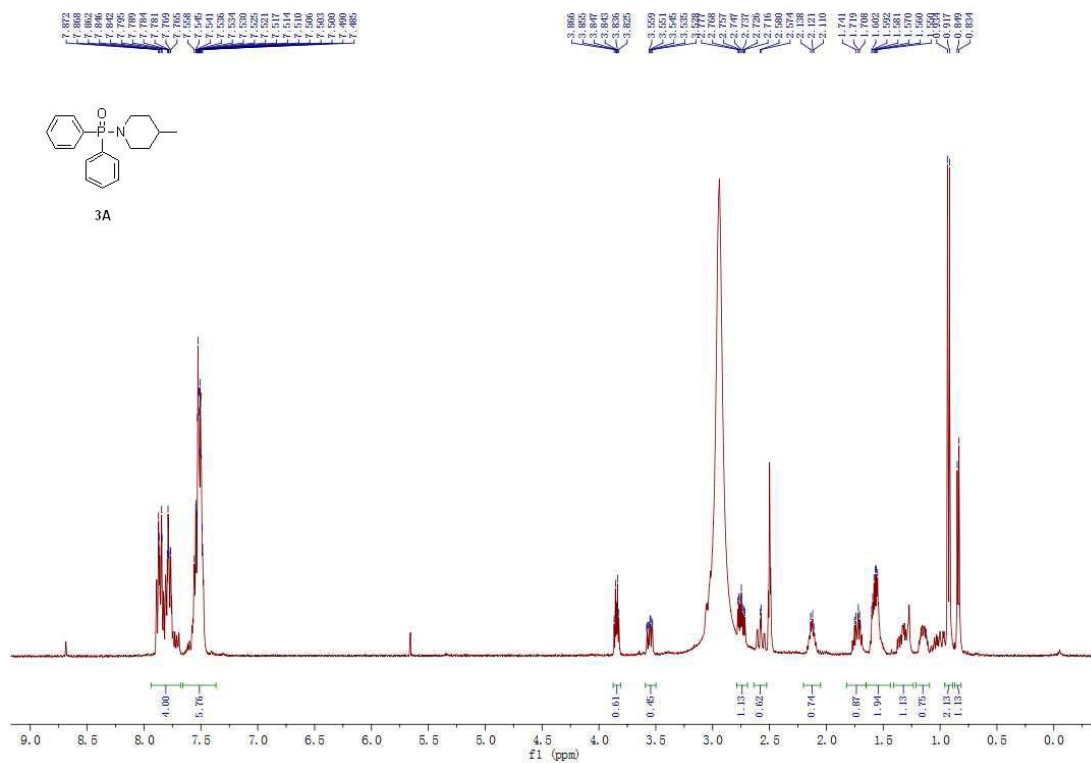

$^1\text{H}$  NMR of **3B**

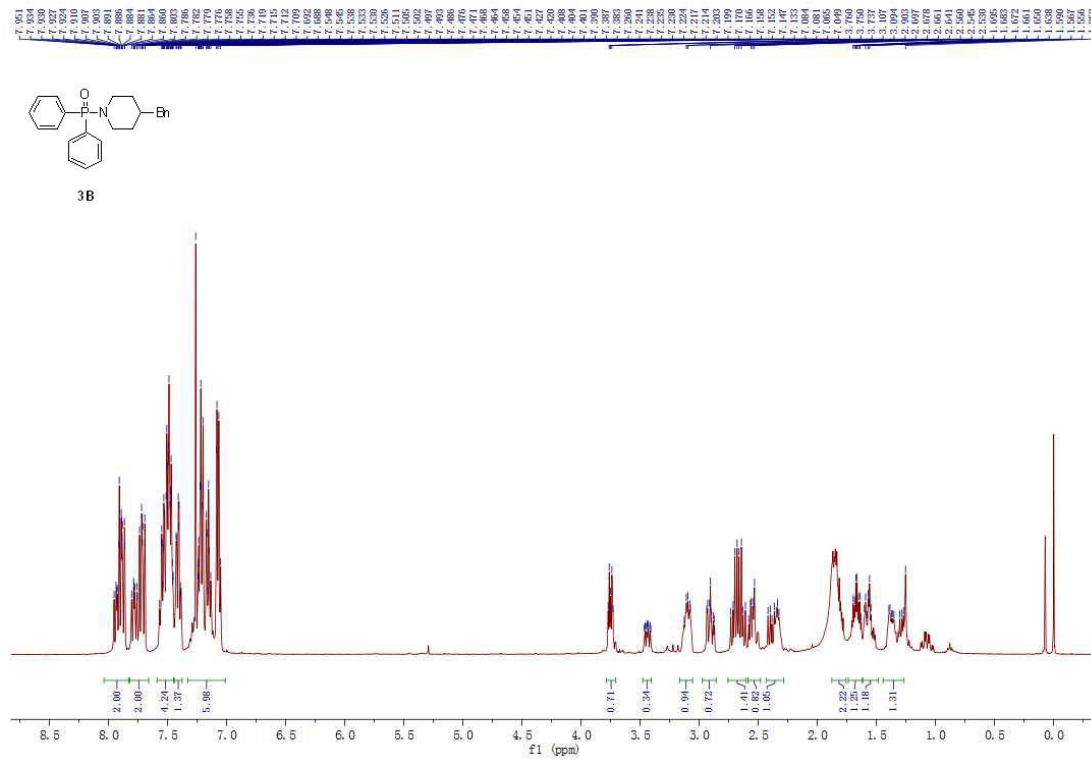

<sup>13</sup>C NMR of **3B**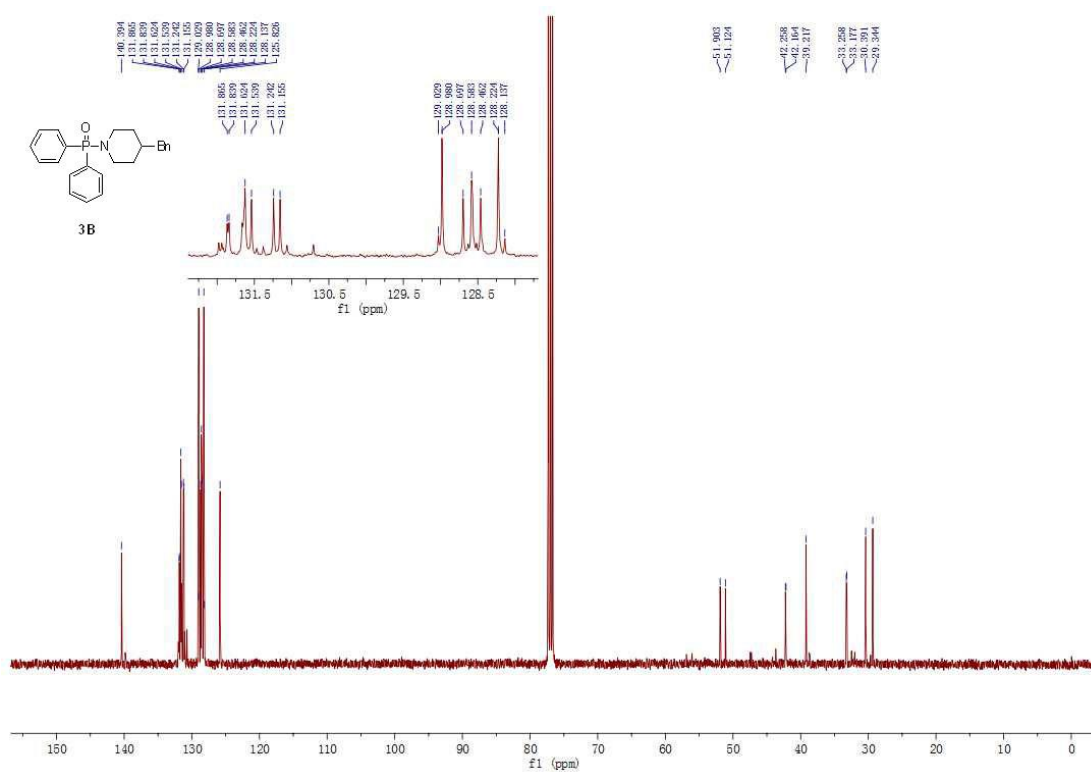<sup>31</sup>P NMR of **3B**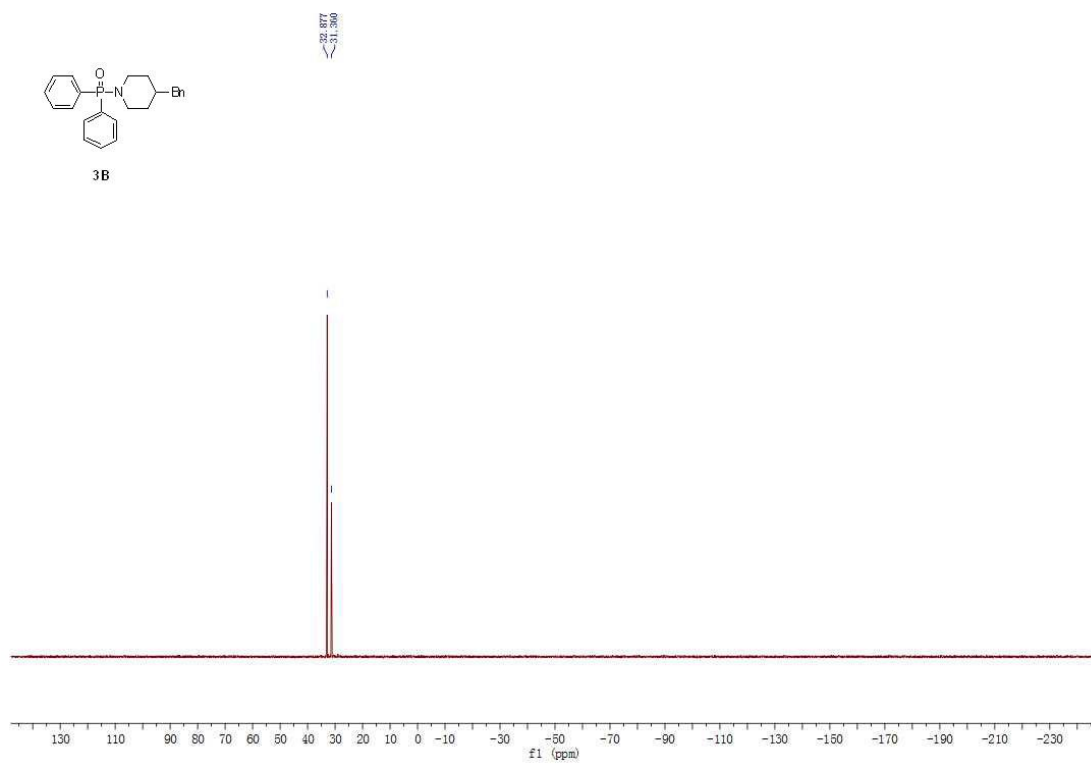

Supplement: Supplementary file 1 [file 3736369]
